# Supplementary material for: Transcriptomics Reveals Host-Dependent Differences of Polysaccharides Biosynthesis in Cynomorium songaricum
Source: MDPI journal article supplement (doi:10.3390/molecules27010044), 2021-12-22
Supplement: s1 [file s1]

## Supplementary Materials

**Table S1.** Summary of sequencing data for *Cynomorium songaricum* transcriptome.

|                                            | CR     | CS    |
|--------------------------------------------|--------|-------|
| <b>Unfiltered data</b>                     |        |       |
| Data of reads number (million)             | 51.31  | 46.89 |
| Reads length                               | 150    | 150   |
| GC (%)                                     | 47.61  | 47.78 |
| Data of reads number×read length (million) | 7,696  | 7,033 |
| Q20 (%)                                    | 96.77  | 96.67 |
| Q30 (%)                                    | 91.47  | 91.29 |
| <b>Filtered data<sup>1</sup></b>           |        |       |
| Data of reads number (million)             | 51.24  | 46.80 |
| Data of reads number×read length (million) | 7,686  | 7,020 |
| Q20 (%)                                    | 96.82  | 96.72 |
| Q30 (%)                                    | 91.54  | 91.36 |
| <b>Mapped data<sup>2</sup></b>             |        |       |
| Data of unique mapped reads (million)      | 42.46  | 39.45 |
| Data of multiple mapped reads (million)    | 1.61   | 1.39  |
| Mapping ratio (%)                          | 89.90  | 90.31 |
| <b>Compiled data</b>                       |        |       |
| Total number of unigenes                   | 95,126 |       |
| Total Length (bp) (million)                | 68.96  |       |
| N50 (bp)                                   | 1,086  |       |
| Max length (bp)                            | 15,090 |       |
| Min length (bp)                            | 201    |       |
| Average Length (bp)                        | 724    |       |
| GC content (%)                             | 42.03  |       |

<sup>1</sup> Reads with a quality score < 30 and length < 60 bp were excluded;

<sup>2</sup> Mapping ratio = (Unique mapped reads + Multiple mapped reads) / Filtered reads.

**Table S2.** Primary metabolism genes differentially expressed in CR and CS.

| Gene name                      | Protein name                                                           | log <sub>2</sub> Ratio<br>(CR/CS) |
|--------------------------------|------------------------------------------------------------------------|-----------------------------------|
| <b>Carbohydrate metabolism</b> |                                                                        |                                   |
| <i>N/A</i>                     | Glycosyl hydrolase 5 family protein                                    | 2.66                              |
| <i>A6</i>                      | Probable glucan endo-1,3-beta-glucosidase A6                           | 1.51                              |
| <i>AGAL2</i>                   | Alpha-galactosidase 2                                                  | -1.96                             |
| <i>Aldoa</i>                   | Fructose-bisphosphate aldolase A                                       | -10.68                            |
| <i>ALG10</i>                   | Dol-P-Glc:Glc(2)Man(9)GlcNAc(2)-PP-Dol alpha-1,2-glucosyltransferase   | -1.23                             |
| <i>At1g27200</i>               | Glycosyltransferase family 92 protein At1g27200                        | -5.03                             |
| <i>At1g32860</i>               | Glucan endo-1,3-beta-glucosidase 11                                    | 3.20                              |
| <i>At1g48100</i>               | Polygalacturonase At1g48100                                            | 2.40                              |
| <i>At1g64760</i>               | Glucan endo-1,3-beta-glucosidase 8                                     | 1.83                              |
| <i>At2g43610</i>               | Endochitinase At2g43610                                                | 2.72                              |
| <i>At2g43620</i>               | Endochitinase At2g43620                                                | 3.38                              |
| <i>At2g43860</i>               | Polygalacturonase                                                      | -2.32                             |
| <i>At2g01630</i>               | Glucan endo-1,3-beta-glucosidase 3                                     | 2.19                              |
| <i>At2g27500</i>               | Glucan endo-1,3-beta-glucosidase 14                                    | 1.20                              |
| <i>At2g31390</i>               | Probable fructokinase-1                                                | 2.94                              |
| <i>At3g08590</i>               | Probable 2,3-bisphosphoglycerate-independent phosphoglycerate mutase 2 | 2.42                              |
| <i>At3g05260</i>               | Glucose and ribitol dehydrogenase homolog 2                            | -1.04                             |
| <i>At4g26390</i>               | Probable pyruvate kinase, cytosolic isozyme                            | 3.58                              |
| <i>At4g29360</i>               | Glucan endo-1,3-beta-glucosidase 12                                    | 1.63                              |
| <i>AXY4</i>                    | ALTERED XYLOGLUCAN 4                                                   | 2.26                              |
| <i>AXY4L</i>                   | Protein ALTERED XYLOGLUCAN 4-like                                      | -1.17                             |
| <i>BACOVA_02659</i>            | Beta-glucosidase BoGH3B                                                | 1.61                              |
| <i>BG</i>                      | Basic 7S globulin                                                      | 3.26                              |
| <i>BGAL12</i>                  | Beta-galactosidase                                                     | -1.00                             |
| <i>BGAL5</i>                   | Beta-galactosidase 5                                                   | -1.32                             |
| <i>BGAL7</i>                   | Beta-galactosidase 7                                                   | -3.29                             |
| <i>BGLU23</i>                  | Beta-glucosidase 23                                                    | -2.57                             |
| <i>BGLU25</i>                  | Probable inactive beta-glucosidase 25                                  | 3.12                              |
| <i>BGLU44</i>                  | Beta-glucosidase 44                                                    | -1.08                             |
| <i>BGLU6</i>                   | Beta-glucosidase 6                                                     | -1.53                             |
| <i>BXL4</i>                    | Beta-D-xylosidase 4                                                    | 1.78                              |
| <i>BXL5</i>                    | Probable beta-D-xylosidase 5                                           | -2.84                             |
| <i>CAISE5</i>                  | Glucose and ribitol dehydrogenase                                      | 5.35                              |
| <i>CALS10</i>                  | Callose synthase 10                                                    | 3.86                              |
| <i>CALS9</i>                   | Callose synthase 9                                                     | 8.81                              |
| <i>Cbr2</i>                    | Carbonyl reductase [NADPH] 2                                           | -8.62                             |
| <i>CEMIP</i>                   | Cell migration-inducing and hyaluronan-binding protein                 | -10.45                            |
| <i>Cemip</i>                   | Cell migration-inducing and hyaluronan-binding protein                 | -10.21                            |
| <i>ChiC</i>                    | Class V chitinase                                                      | -1.26                             |
| <i>CHIT3</i>                   | Hevamine-A                                                             | 3.75                              |
| <i>CWINV1</i>                  | Beta-fructofuranosidase, insoluble isoenzyme CWINV1                    | 1.40                              |
| <i>CYFBP</i>                   | Fructose-1,6-bisphosphatase, cytosolic                                 | 2.29                              |
| <i>CYT1</i>                    | Mannose-1-phosphate guanylyltransferase 1                              | 3.29                              |
| <i>DSP4</i>                    | Phosphoglucan phosphatase DSP4, amyloplastic                           | -1.95                             |

|                                     |                                                               |        |
|-------------------------------------|---------------------------------------------------------------|--------|
| <i>ENO</i>                          | Enolase                                                       | 2.10   |
| <i>ENO1</i>                         | Alpha-enolase                                                 | -8.14  |
| <i>ENO1</i>                         | Alpha-enolase                                                 | -9.56  |
| <i>eno1</i>                         | Alpha-enolase                                                 | 9.54   |
| <i>ENO2</i>                         | Bifunctional enolase 2/transcriptional activator              | 3.04   |
| <i>EP3</i>                          | Endochitinase EP3                                             | -4.70  |
| <i>FBA3</i>                         | Fructose-bisphosphate aldolase 3, chloroplastic               | 1.73   |
| <i>FBA5</i>                         | Fructose-bisphosphate aldolase 5, cytosolic                   | 4.09   |
| <i>FBA6</i>                         | Fructose-bisphosphate aldolase 6, cytosolic                   | 4.07   |
| <i>FBA8</i>                         | Fructose-bisphosphate aldolase 8, cytosolic                   | 3.08   |
| <i>GAE1</i>                         | UDP-glucuronate 4-epimerase 1                                 | 4.21   |
| <i>GAE6</i>                         | UDP-glucuronate 4-epimerase 6                                 | 4.73   |
| <i>GALM</i>                         | Aldose 1-epimerase                                            | 1.34   |
| <i>GapA</i>                         | Glyceraldehyde-3-phosphate dehydrogenase A, chloroplastic     | 8.83   |
| <i>GAPA1</i>                        | Glyceraldehyde-3-phosphate dehydrogenase GAPA1, chloroplastic | 5.47   |
| <i>GAPA2</i>                        | Glyceraldehyde-3-phosphate dehydrogenase GAPA2, chloroplastic | 4.37   |
| <i>GAPB</i>                         | Glyceraldehyde-3-phosphate dehydrogenase GAPB, chloroplastic  | 7.25   |
| <i>GAPC</i>                         | Glyceraldehyde-3-phosphate dehydrogenase, cytosolic           | 3.25   |
| <i>GAPC1</i>                        | Glyceraldehyde-3-phosphate dehydrogenase GAPC1, cytosolic     | 3.21   |
| <i>GAPC2</i>                        | Glyceraldehyde-3-phosphate dehydrogenase GAPC2, cytosolic     | 3.42   |
| <i>GAPDH</i>                        | Glyceraldehyde-3-phosphate dehydrogenase                      | -10.12 |
| <i>GAPDH</i>                        | Glyceraldehyde-3-phosphate dehydrogenase                      | -9.94  |
| <i>gapdh-2</i>                      | Glyceraldehyde-3-phosphate dehydrogenase 2                    | 10.76  |
| <i>GATL1</i>                        | Probable galacturonosyltransferase-like 1                     | 1.73   |
| <i>GLC1</i>                         | Glucan endo-1,3-beta-glucosidase                              | -3.24  |
| <i>GMD1</i>                         | GDP-mannose 4,6 dehydratase 1                                 | 2.98   |
| <i>GN1</i>                          | Lichenase                                                     | -1.75  |
| <i>GOLS2</i>                        | Galactinol synthase 2                                         | -1.23  |
| <i>GPD3</i>                         | Glyceraldehyde-3-phosphate dehydrogenase 3                    | 2.24   |
| <i>GSVIVT</i><br><i>00026920001</i> | Probable polygalacturonase                                    | 1.15   |
| <i>Gyg1</i>                         | Glycogenin-1                                                  | -1.24  |
| <i>INVA</i>                         | Acid beta-fructofuranosidase                                  | 2.29   |
| <i>INVF</i>                         | Probable alkaline/neutral invertase F                         | 1.35   |
| <i>IRX7</i>                         | Probable glucuronoxylan glucuronosyltransferase IRX7          | 1.46   |
| <i>IRX15</i>                        | Protein IRREGULAR XYLEM 15                                    | -1.28  |
| <i>LDHA</i>                         | L-lactate dehydrogenase B                                     | 2.56   |
| <i>LDHA</i>                         | L-lactate dehydrogenase A                                     | 3.14   |
| <i>LDHA</i>                         | L-lactate dehydrogenase A chain                               | -8.19  |
| <i>ldhba</i>                        | L-lactate dehydrogenase B-A chain                             | 9.98   |
| <i>MAN5</i>                         | Mannan endo-1,4-beta-mannosidase 5                            | 1.72   |
| <i>Mat2a</i>                        | S-adenosylmethionine synthase isoform type-2                  | 9.45   |
| <i>MIOX1</i>                        | Inositol oxygenase 1                                          | -2.64  |
| <i>MUR1</i>                         | GDP-mannose 4,6 dehydratase 2                                 | 3.21   |
| <i>MSR2</i>                         | Protein MANNAN SYNTHESIS-RELATED 2                            | 1.24   |
| <i>NANA</i>                         | Aspartic proteinase NANA, chloroplast                         | -3.64  |
| <i>OFUT20</i>                       | O-fucosyltransferase 20                                       | -2.53  |
| <i>OFUT23</i>                       | O-fucosyltransferase 23                                       | -1.86  |
| <i>OFUT27</i>                       | O-fucosyltransferase 27                                       | -1.19  |
| <i>OFUT35</i>                       | O-fucosyltransferase 35                                       | 1.14   |
| <i>OFUT9</i>                        | O-fucosyltransferase 9                                        | 1.16   |

|                          |                                                                       |        |
|--------------------------|-----------------------------------------------------------------------|--------|
| <i>PF14_0425</i>         | Fructose-bisphosphate aldolase                                        | 3.54   |
| <i>pfk1</i>              | ATP-dependent 6-phosphofructokinase                                   | 2.16   |
| <i>PFK3</i>              | ATP-dependent 6-phosphofructokinase 3                                 | 3.26   |
| <i>PGK1</i>              | Phosphoglycerate kinase 1                                             | -8.29  |
| <i>PGAM1</i>             | Phosphoglycerate mutase 1                                             | -8.57  |
| <i>PGMP</i>              | Phosphoglucomutase, chloroplastic                                     | -1.70  |
| <i>PKM</i>               | Pyruvate kinase PKM                                                   | -10.01 |
| <i>PMI2</i>              | Mannose-6-phosphate isomerase 2                                       | 1.61   |
| <i>pyk1</i>              | Pyruvate kinase                                                       | 1.71   |
| <i>RFS2</i>              | Probable galactinol--sucrose galactosyltransferase 2                  | 1.76   |
| <i>RFS5</i>              | Probable galactinol--sucrose galactosyltransferase 5                  | -1.56  |
| <i>RFS6</i>              | Probable galactinol--sucrose galactosyltransferase 6                  | 2.85   |
| <i>SBE2.2</i>            | 1,4-alpha-glucan-branching enzyme 2-2, chloroplastic/amyloplastic     | -1.79  |
| <i>SETH3</i>             | Probable arabinose 5-phosphate isomerase                              | 8.82   |
| <i>sgl</i>               | UDP-glucose 6-dehydrogenase                                           | 8.35   |
| <i>SS2</i>               | Granule-bound starch synthase 2, chloroplastic/amyloplastic           | 4.06   |
| <i>tal</i>               | Transaldolase                                                         | 2.51   |
| <i>tal</i>               | Transaldolase                                                         | 1.76   |
| <i>TBL33</i>             | Protein trichome birefringence-like 33                                | 1.44   |
| <i>Tkfc</i>              | Triokinase/FMN cyclase                                                | 1.21   |
| <i>TPPF</i>              | Probable trehalose-phosphate phosphatase F                            | 2.27   |
| <i>TPPJ</i>              | Probable trehalose-phosphate phosphatase J                            | 2.48   |
| <i>TPS11</i>             | Probable alpha,alpha-trehalose-phosphate synthase [UDP-forming]<br>11 | 3.34   |
| <i>TPS7</i>              | Probable alpha,alpha-trehalose-phosphate synthase [UDP-forming] 7     | -1.40  |
| <i>TPS9</i>              | Probable alpha,alpha-trehalose-phosphate synthase [UDP-forming] 9     | 8.76   |
| <i>UGP1</i>              | UTP--glucose-1-phosphate uridylyltransferase 1                        | 2.80   |
| <i>UGT71A15</i>          | UDP-glycosyltransferase 71A15                                         | 2.93   |
| <i>UGT73B1</i>           | UDP-glycosyltransferase 73B1                                          | 3.50   |
| <i>UGT73B5</i>           | UDP-glycosyltransferase 73B5                                          | 4.69   |
| <i>UGT74C1</i>           | UDP-glycosyltransferase 74C1                                          | -3.17  |
| <i>UGT85A24</i>          | 7-deoxyloganetin glucosyltransferase                                  | -4.34  |
| <i>UGT87A1</i>           | UDP-glycosyltransferase 87A1                                          | -1.80  |
| <i>UGT88F5</i>           | UDP-glycosyltransferase 88F5                                          | -1.49  |
| <i>UGT89A2</i>           | UDP-glycosyltransferase 89A2                                          | -1.40  |
| <i>UGT94E5</i>           | Beta-D-glucosyl crocetin beta-1,6-glucosyltransferase                 | -7.26  |
| <i>USP</i>               | UDP-sugar pyrophosphorylase                                           | 1.05   |
| <i>UXS3</i>              | UDP-glucuronic acid decarboxylase 3                                   | 3.65   |
| <i>xlnA</i>              | Endo-1,4-beta-xylanase A                                              | 1.81   |
| <i>XTH18</i>             | Probable xyloglucan endotransglucosylase/hydrolase protein 18         | 1.88   |
| <i>XTH22</i>             | Xyloglucan endotransglucosylase/hydrolase protein 22                  | 2.78   |
| <i>XTH23</i>             | Probable xyloglucan endotransglucosylase/hydrolase protein 23         | 3.22   |
| <i>XTH27</i>             | Probable xyloglucan endotransglucosylase/hydrolase protein 27         | 2.69   |
| <i>XTH30</i>             | Probable xyloglucan endotransglucosylase/hydrolase protein 30         | -3.79  |
| <i>XTH32</i>             | Probable xyloglucan endotransglucosylase/hydrolase protein 32         | 2.07   |
| <i>XTH9</i>              | Xyloglucan endotransglucosylase/hydrolase protein 9                   | 3.04   |
| <i>XXT3</i>              | Probable xyloglucan 6-xylosyltransferase 3                            | 2.71   |
| <i>N/A</i>               | 2,3-bisphosphoglycerate-dependent phosphoglycerate mutase             | -1.31  |
| <b>Lipids metabolism</b> |                                                                       |        |
| <i>N/A</i>               | Lipase                                                                | 1.01   |
| <i>AAE18</i>             | Probable acyl-activating enzyme 18, peroxisomal                       | -1.33  |

|                  |                                                                                |       |
|------------------|--------------------------------------------------------------------------------|-------|
| <i>accD</i>      | Acetyl-coenzyme A carboxylase carboxyl transferase subunit beta, chloroplastic | -1.03 |
| <i>accD</i>      | Acetyl-coenzyme A carboxylase carboxyl transferase subunit beta, chloroplastic | -1.08 |
| <i>ACL1.1</i>    | Acyl carrier protein 1, chloroplastic                                          | -1.57 |
| <i>ACX3</i>      | Acyl-coenzyme A oxidase 3, peroxisomal                                         | -2.09 |
| <i>ACX4</i>      | Acyl-coenzyme A oxidase 4, peroxisomal                                         | 3.23  |
| <i>ACLB-2</i>    | ATP-citrate synthase beta chain protein 2                                      | -1.04 |
| <i>APA1</i>      | Aspartic proteinase A1                                                         | 1.72  |
| <i>APG</i>       | GDSL esterase/lipase APG                                                       | 6.15  |
| <i>AT1</i>       | Long-chain-alcohol O-fatty-acyltransferase                                     | -2.53 |
| <i>At1g06800</i> | Phospholipase A1-Igamma1, chloroplastic                                        | 4.56  |
| <i>At1g11820</i> | Glucan endo-1,3-beta-glucosidase 1                                             | 2.09  |
| <i>At1g54790</i> | GDSL esterase/lipase At1g54790                                                 | -1.14 |
| <i>At1g71691</i> | GDSL esterase/lipase At1g71691                                                 | 6.37  |
| <i>At3g26430</i> | GDSL esterase/lipase At3g26430                                                 | -9.34 |
| <i>At3g48460</i> | GDSL esterase/lipase At3g48460                                                 | -3.07 |
| <i>At4g16820</i> | Phospholipase A1-Ibeta2, chloroplastic                                         | -4.78 |
| <i>At4g18970</i> | GDSL esterase/lipase At4g18970                                                 | 4.00  |
| <i>At4g26790</i> | GDSL esterase/lipase At4g26790                                                 | 2.97  |
| <i>At5g03610</i> | GDSL esterase/lipase At5g03610                                                 | 1.06  |
| <i>At5g33370</i> | GDSL esterase/lipase At5g33370                                                 | 5.36  |
| <i>At5g41890</i> | GDSL esterase/lipase At5g41890                                                 | 2.52  |
| <i>At5g42170</i> | GDSL esterase/lipase At5g42170                                                 | -1.14 |
| <i>At5g67130</i> | PI-PLC X domain-containing protein At5g67130                                   | -1.82 |
| <i>CLS</i>       | Cardiolipin synthase (CMP-forming), mitochondrial                              | 1.79  |
| <i>CPRD49</i>    | GDSL esterase/lipase CPRD49                                                    | 2.23  |
| <i>CUT1</i>      | 3-ketoacyl-CoA synthase 6                                                      | 1.44  |
| <i>CYP86A2</i>   | Cytochrome P450 86A2                                                           | 4.23  |
| <i>DCI1</i>      | Delta(3,5)-Delta(2,4)-dienoyl-CoA isomerase, peroxisomal                       | -1.03 |
| <i>DGAT1C</i>    | Diacylglycerol O-acyltransferase 1C                                            | -3.71 |
| <i>ECI2</i>      | Enoyl-CoA delta isomerase 2, peroxisomal                                       | 3.94  |
| <i>FAB2</i>      | Stearoyl-[acyl-carrier-protein] 9-desaturase, chloroplastic                    | 3.30  |
| <i>fabG</i>      | 3-oxoacyl-[acyl-carrier-protein] reductase FabG                                | 4.84  |
| <i>FABP3</i>     | Fatty acid-binding protein, heart                                              | 9.18  |
| <i>FAD2</i>      | Omega-6 fatty acid desaturase, endoplasmic reticulum                           | 2.09  |
| <i>FAD6</i>      | Omega-6 fatty acid desaturase, chloroplastic                                   | 8.52  |
| <i>FAD6</i>      | Omega-6 fatty acid desaturase, chloroplastic                                   | 9.09  |
| <i>FAD6</i>      | Omega-6 fatty acid desaturase, chloroplastic                                   | 9.22  |
| <i>FAD7</i>      | sn-2 acyl-lipid omega-3 desaturase (ferredoxin), chloroplastic                 | -2.82 |
| <i>FAD7A-1</i>   | Omega-3 fatty acid desaturase, chloroplastic                                   | -2.03 |
| <i>FAH1</i>      | Dihydroceramide fatty acyl 2-hydroxylase FAH1                                  | 2.17  |
| <i>FAR2</i>      | Fatty acyl-CoA reductase 2                                                     | -1.49 |
| <i>FAR3</i>      | Fatty acyl-CoA reductase 3                                                     | -1.71 |
| <i>FDH</i>       | 3-ketoacyl-CoA synthase 10                                                     | 3.11  |
| <i>GDPDL7</i>    | Glycerophosphodiester phosphodiesterase GDPDL7                                 | 1.32  |
| <i>HACL</i>      | 2-hydroxyacyl-CoA lyase                                                        | 4.51  |
| <i>INPS1</i>     | Inositol-3-phosphate synthase                                                  | 1.39  |
| <i>KCS1</i>      | 3-ketoacyl-CoA synthase 1                                                      | 3.18  |
| <i>KCS11</i>     | 3-ketoacyl-CoA synthase 11                                                     | -1.50 |
| <i>KCS20</i>     | 3-ketoacyl-CoA synthase 20                                                     | -1.87 |

|                               |                                                                                  |       |
|-------------------------------|----------------------------------------------------------------------------------|-------|
| <i>LACS2</i>                  | Long chain acyl-CoA synthetase 2                                                 | 1.90  |
| <i>LACS4</i>                  | Long chain acyl-CoA synthetase 4                                                 | 2.14  |
| <i>LAG2</i>                   | LAG1 longevity assurance homolog 2                                               | 1.13  |
| <i>lip</i>                    | Lipase                                                                           | 1.67  |
| <i>LIP1</i>                   | Triacylglycerol lipase 1                                                         | 1.13  |
| <i>LPAT4</i>                  | Probable 1-acyl-sn-glycerol-3-phosphate acyltransferase 4                        | -1.66 |
| <i>LYPLA1</i>                 | Acyl-protein thioesterase 1                                                      | -1.32 |
| <i>MFP2</i>                   | Glyoxysomal fatty acid beta-oxidation multifunctional protein MFP-a              | -1.59 |
| <i>MTACP1</i>                 | Acyl carrier protein 1, mitochondrial                                            | 1.68  |
| <i>MTM1</i>                   | Phosphatidylinositol-3-phosphatase myotubularin-1                                | -2.25 |
| <i>NADP-ME2</i>               | NADP-dependent malic enzyme                                                      | -1.00 |
| <i>NADP-ME4</i>               | NADP-dependent malic enzyme 4, chloroplastic                                     | 4.61  |
| <i>PAS2A</i>                  | Very-long-chain (3R)-3-hydroxyacyl-CoA dehydratase PASTICCINO 2A                 | -1.40 |
| <i>PED1</i>                   | 3-ketoacyl-CoA thiolase 2, peroxisomal                                           | 2.62  |
| <i>PLC6</i>                   | Phosphoinositide phospholipase C 6                                               | 1.97  |
| <i>PLDDELTA</i>               | Phospholipase D delta                                                            | 1.47  |
| <i>PLP2</i>                   | Patatin-like protein 2                                                           | 3.08  |
| <i>PLP9</i>                   | Probable inactive patatin-like protein 9                                         | 1.33  |
| <i>SDRA</i>                   | Short-chain dehydrogenase/reductase SDRA                                         | 5.15  |
| <i>SEI1</i>                   | Seipin-1                                                                         | -1.96 |
| <i>SLD2</i>                   | Acyl-lipid (9-3)-desaturase                                                      | 1.33  |
| <i>WRI1</i>                   | Ethylene-responsive transcription factor WRI1                                    | -3.65 |
| <b>Amino acids metabolism</b> |                                                                                  |       |
| <i>3-Apr</i>                  | 5'-adenylylsulfate reductase 3, chloroplastic                                    | 1.31  |
| <i>ADT3</i>                   | Arogenate dehydratase 3, chloroplastic                                           | -1.15 |
| <i>AGT1</i>                   | Serine--glyoxylate aminotransferase                                              | 9.13  |
| <i>ALAAT1</i>                 | Alanine aminotransferase 1, mitochondrial                                        | 3.36  |
| <i>ARGAH1</i>                 | Arginase 1, mitochondrial                                                        | 8.29  |
| <i>ASK5</i>                   | Shaggy-related protein kinase epsilon                                            | -1.69 |
| <i>ASN1</i>                   | Asparagine synthetase [glutamine-hydrolyzing] 1                                  | 1.49  |
| <i>ASP1</i>                   | Aspartate aminotransferase, mitochondrial                                        | -1.03 |
| <i>ASP1</i>                   | Aspartic proteinase Asp1                                                         | 1.10  |
| <i>ASP2</i>                   | Aspartate aminotransferase, cytoplasmic isozyme 1                                | 2.28  |
| <i>ASP3</i>                   | Aspartate aminotransferase 3, chloroplastic                                      | 1.06  |
| <i>ASPG1</i>                  | Protein ASPARTIC PROTEASE IN GUARD CELL 1                                        | 1.27  |
| <i>At4g29120</i>              | Probable 3-hydroxyisobutyrate dehydrogenase-like 1, mitochondrial                | 4.11  |
| <i>BCAT2</i>                  | Branched-chain-amino-acid aminotransferase 2, chloroplastic                      | -1.74 |
| <i>BCDH</i>                   | 2-oxoisovalerate dehydrogenase subunit beta 1, mitochondrial                     | 3.71  |
| <i>CM1</i>                    | Chorismate mutase 1, chloroplastic                                               | -2.25 |
| <i>CM2</i>                    | Chorismate mutase 2                                                              | -1.22 |
| <i>CS1</i>                    | Chorismate synthase 1, chloroplastic                                             | -1.28 |
| <i>ctps</i>                   | CTP synthase                                                                     | 3.55  |
| <i>DHAPS-1</i>                | Phospho-2-dehydro-3-deoxyheptonate aldolase 2, chloroplastic                     | -1.05 |
| <i>DHDPS2</i>                 | 4-hydroxy-tetrahydrodipicolinate synthase 2, chloroplastic                       | 3.55  |
| <i>DHS1</i>                   | Phospho-2-dehydro-3-deoxyheptonate aldolase 1, chloroplastic                     | 2.65  |
| <i>EMB3004</i>                | Bifunctional 3-dehydroquinate dehydratase/shikimate dehydrogenase, chloroplastic | 5.49  |
| <i>GAD1</i>                   | Glutamate decarboxylase 1                                                        | 2.07  |
| <i>GDCST</i>                  | Aminomethyltransferase, mitochondrial                                            | 1.49  |
| <i>GDH2</i>                   | Glycine cleavage system H protein 2, mitochondrial                               | 1.02  |

|                |                                                                                                                  |       |
|----------------|------------------------------------------------------------------------------------------------------------------|-------|
| <i>GDH2</i>    | Glutamate dehydrogenase 2                                                                                        | 2.99  |
| <i>GEK1</i>    | D-aminoacyl-tRNA deacylase                                                                                       | 4.96  |
| <i>GGAT1</i>   | Glutamate--glyoxylate aminotransferase 1                                                                         | 4.16  |
| <i>GGH3</i>    | Probable gamma-glutamyl hydrolase 3                                                                              | -1.02 |
| <i>GGT3</i>    | Glutathione hydrolase 3                                                                                          | -3.17 |
| <i>GLN1-2</i>  | Glutamine synthetase cytosolic isozyme 1-2                                                                       | -3.94 |
| <i>GLT1</i>    | Glutamate synthase 1 [NADH], chloroplastic                                                                       | 2.70  |
| <i>GS1-1</i>   | Glutamine synthetase cytosolic isozyme 1                                                                         | -1.38 |
| <i>GS1-2</i>   | Glutamine synthetase nodule isozyme                                                                              | 2.21  |
| <i>GSH2</i>    | Glutathione synthetase, chloroplastic                                                                            | 1.17  |
| <i>GSTU10</i>  | Glutathione S-transferase U10                                                                                    | 5.55  |
| <i>GSTU19</i>  | Glutathione S-transferase U19                                                                                    | 2.39  |
| <i>GSTU8</i>   | Glutathione S-transferase U8                                                                                     | 4.52  |
| <i>HGO</i>     | Homogentisate 1,2-dioxygenase                                                                                    | 3.15  |
| <i>HISN3</i>   | 1-(5-phosphoribosyl)-5-[(5-phosphoribosylamino)methylideneamino]imidazole-4-carboxamide isomerase, chloroplastic | -1.33 |
| <i>HISN7</i>   | Bifunctional phosphatase IMPL2, chloroplastic                                                                    | -1.58 |
| <i>HMGCL</i>   | Hydroxymethylglutaryl-CoA lyase, mitochondrial                                                                   | 1.37  |
| <i>HMT1</i>    | Homocysteine S-methyltransferase 1                                                                               | 4.13  |
| <i>ilv-2</i>   | Ketol-acid reductoisomerase, mitochondrial                                                                       | 4.05  |
| <i>IPMS1</i>   | 2-isopropylmalate synthase 1, chloroplastic                                                                      | 3.11  |
| <i>ISS1</i>    | Aromatic aminotransferase ISS1                                                                                   | -1.85 |
| <i>IVD</i>     | Isovaleryl-CoA dehydrogenase, mitochondrial                                                                      | 8.93  |
| <i>LCD</i>     | L-cysteine desulfhydrase                                                                                         | 8.27  |
| <i>LIP1</i>    | Lipoyl synthase, mitochondrial                                                                                   | 3.48  |
| <i>lys3</i>    | Saccharopine dehydrogenase [NAD(+), L-lysine-forming]                                                            | 4.18  |
| <i>MCCB</i>    | Methylcrotonoyl-CoA carboxylase beta chain, mitochondrial                                                        | 8.93  |
| <i>NAA10</i>   | N-terminal acetyltransferase A complex catalytic subunit NAA10                                                   | 2.13  |
| <i>NMT1</i>    | Glycylpeptide N-tetradecanoyltransferase 1                                                                       | 1.41  |
| <i>NMT2</i>    | Phosphomethylethanolamine N-methyltransferase                                                                    | 1.74  |
| <i>NSFBx</i>   | Probable F-box protein At5g04010                                                                                 | 9.23  |
| <i>OXP1</i>    | 5-oxoprolinase                                                                                                   | -1.20 |
| <i>P4H2</i>    | Prolyl 4-hydroxylase 2                                                                                           | 3.07  |
| <i>P4H3</i>    | Probable prolyl 4-hydroxylase 3                                                                                  | 3.10  |
| <i>P5CS</i>    | Delta-1-pyrroline-5-carboxylate synthase                                                                         | 1.36  |
| <i>P5CSB</i>   | Delta-1-pyrroline-5-carboxylate synthase B                                                                       | 3.59  |
| <i>PAL</i>     | Phenylalanine ammonia-lyase                                                                                      | -1.19 |
| <i>PCAS-1</i>  | Bifunctional L-3-cyanoalanine synthase/cysteine synthase 1, mitochondrial                                        | 1.71  |
| <i>PDX13</i>   | Pyridoxal 5'-phosphate synthase subunit PDX1.3                                                                   | 4.34  |
| <i>PGDH2</i>   | D-3-phosphoglycerate dehydrogenase 2, chloroplastic                                                              | 2.70  |
| <i>POX2</i>    | Proline dehydrogenase 2, mitochondrial                                                                           | 1.40  |
| <i>PYD1</i>    | Dihydropyrimidine dehydrogenase (NADP(+)), chloroplastic                                                         | 1.02  |
| <i>SAMDC4</i>  | S-adenosylmethionine decarboxylase proenzyme 4                                                                   | 2.02  |
| <i>serA</i>    | D-3-phosphoglycerate dehydrogenase                                                                               | 6.85  |
| <i>SHM1</i>    | Serine hydroxymethyltransferase 1, mitochondrial                                                                 | 8.97  |
| <i>SK3</i>     | Shikimate kinase 3, chloroplastic                                                                                | -1.72 |
| <i>TGM2</i>    | Protein-glutamine gamma-glutamyltransferase 2                                                                    | -9.92 |
| <i>THA1</i>    | Probable low-specificity L-threonine aldolase 1                                                                  | 4.68  |
| <i>TYRAAT1</i> | Arogenate dehydrogenase 1, chloroplastic                                                                         | -2.25 |
| <i>TYRDC-2</i> | Tyrosine decarboxylase 2                                                                                         | 4.17  |

## Protein metabolism

|                  |                                                                 |       |
|------------------|-----------------------------------------------------------------|-------|
| <i>Acot13</i>    | Acyl-coenzyme A thioesterase 13                                 | 1.30  |
| <i>AP25</i>      | Aspartyl protease 25                                            | 1.45  |
| <i>Apoe</i>      | Apolipoprotein E                                                | -9.95 |
| <i>At1g17710</i> | Inorganic pyrophosphatase 2                                     | -3.42 |
| <i>At1g55760</i> | BTB/POZ domain-containing protein At1g55760                     | -1.02 |
| <i>At1g67340</i> | F-box protein At1g67340                                         | 1.67  |
| <i>At3g53970</i> | Probable proteasome inhibitor                                   | 8.48  |
| <i>At4g03415</i> | Probable protein phosphatase 2C 52                              | 1.05  |
| <i>At4g22670</i> | FAM10 family protein At4g22670                                  | 8.44  |
| <i>At5g04500</i> | Glucosamine inositolphosphorylceramide transferase 1            | 1.95  |
| <i>At5g03795</i> | Probable glycosyltransferase At5g03795                          | -1.39 |
| <i>At5g17580</i> | BTB/POZ domain-containing protein At5g17580                     | 1.78  |
| <i>At5g48800</i> | BTB/POZ domain-containing protein At5g48800                     | 1.53  |
| <i>ATJ3</i>      | Chaperone protein dnaJ 3                                        | 2.53  |
| <i>ATL23</i>     | E3 ubiquitin-protein ligase ATL23                               | 1.26  |
| <i>ATL4</i>      | E3 ubiquitin-protein ligase ATL4                                | 1.72  |
| <i>ATL5</i>      | RING-H2 finger protein ATL5                                     | -2.38 |
| <i>ATL54</i>     | RING-H2 finger protein ATL54                                    | 2.77  |
| <i>ATL64</i>     | RING-H2 finger protein ATL64                                    | 8.58  |
| <i>ATL65</i>     | RING-H2 finger protein ATL65                                    | 2.63  |
| <i>ATL72</i>     | RING-H2 finger protein ATL72                                    | -1.90 |
| <i>B3GALT12</i>  | Probable beta-1,3-galactosyltransferase 12                      | 1.25  |
| <i>B3GALT7</i>   | Beta-1,3-galactosyltransferase 7                                | 1.35  |
| <i>BAG5</i>      | BAG family molecular chaperone regulator 5, mitochondrial       | 1.49  |
| <i>BRG3</i>      | Probable BOI-related E3 ubiquitin-protein ligase 3              | 1.85  |
| <i>CCT5</i>      | T-complex protein 1 subunit epsilon                             | 3.01  |
| <i>CDC48A</i>    | Cell division control protein 48 homolog A                      | 2.83  |
| <i>CDKB1-1</i>   | Cyclin-dependent kinase B1-1                                    | 1.86  |
| <i>CDKG1</i>     | Cyclin-dependent kinase G1                                      | 3.40  |
| <i>CDR1</i>      | Aspartic proteinase CDR1                                        | 1.83  |
| <i>CHIP</i>      | E3 ubiquitin-protein ligase CHIP                                | 9.02  |
| <i>CLPB1</i>     | Chaperone protein ClpB1                                         | 9.68  |
| <i>CLPB4</i>     | Chaperone protein ClpB4, mitochondrial                          | 4.54  |
| <i>CLPP5</i>     | ATP-dependent Clp protease proteolytic subunit 5, chloroplastic | -2.82 |
| <i>cprG</i>      | Cysteine proteinase 7                                           | 8.28  |
| <i>CTSC</i>      | Dipeptidyl peptidase 1                                          | -8.82 |
| <i>CTSL</i>      | Cathepsin L1                                                    | 8.80  |
| <i>CYP18-1</i>   | Peptidyl-prolyl cis-trans isomerase CYP18-1                     | -2.67 |
| <i>CYPA</i>      | Peptidyl-prolyl cis-trans isomerase                             | 10.51 |
| <i>degQ</i>      | Periplasmic pH-dependent serine endoprotease DegQ               | -1.15 |
| <i>DIS1</i>      | E3 ubiquitin-protein ligase DIS1                                | 1.29  |
| <i>DJ1A</i>      | Protein DJ-1 homolog A                                          | 8.67  |
| <i>dnaJ</i>      | Chaperone protein DnaJ                                          | -2.03 |
| <i>DRIP2</i>     | E3 ubiquitin protein ligase DRIP2                               | 4.34  |
| <i>EDA2</i>      | Probable serine protease EDA2                                   | -1.85 |
| <i>EOGT</i>      | EGF domain-specific O-linked N-acetylglucosamine transferase    | 3.23  |
| <i>EOGT</i>      | EGF domain-specific O-linked N-acetylglucosamine transferase    | 1.01  |
| <i>FKBP65</i>    | Peptidyl-prolyl cis-trans isomerase FKBP65                      | 4.88  |
| <i>GALT29A</i>   | Beta-1,6-galactosyltransferase GALT29A                          | -3.71 |
| <i>GT11</i>      | Probable xyloglucan galactosyltransferase GT11                  | 1.70  |



|                                |                                                                                      |        |
|--------------------------------|--------------------------------------------------------------------------------------|--------|
| <i>GT17</i>                    | Probable xyloglucan galactosyltransferase GT17                                       | -1.30  |
| <i>HOP3</i>                    | Hsp70-Hsp90 organizing protein 3                                                     | 8.47   |
| <i>HPTG1</i>                   | Hydroxyproline O-galactosyltransferase HPGT1                                         | -2.33  |
| <i>IGFBP7</i>                  | Insulin-like growth factor-binding protein 7                                         | -9.46  |
| <i>MMP2</i>                    | 72 kDa type IV collagenase                                                           | 10.00  |
| <i>NFP</i>                     | Serine/threonine receptor-like kinase NFP                                            | -2.88  |
| <i>Os03g0144800</i>            | Xyloglucan galactosyltransferase KATAMARI1 homolog                                   | 1.25   |
| <i>Os04g0670200</i>            | Oryzain beta chain                                                                   | -1.24  |
| <i>PAA2</i>                    | Proteasome subunit alpha type-6-B                                                    | 2.61   |
| <i>PDK</i>                     | [Pyruvate dehydrogenase (acetyl-transferring)] kinase, mitochondrial                 | 1.18   |
| <i>PP2B1</i>                   | F-box protein PP2-B1                                                                 | 4.84   |
| <i>PPIA</i>                    | Peptidyl-prolyl cis-trans isomerase A                                                | -10.05 |
| <i>PRMT3</i>                   | Probable protein arginine N-methyltransferase 3                                      | 1.15   |
| <i>PUB25</i>                   | U-box domain-containing protein 25                                                   | 3.59   |
| <i>RD19D</i>                   | Probable cysteine protease RD19D                                                     | -1.18  |
| <i>RD21C</i>                   | Probable cysteine protease RD21C                                                     | 2.34   |
| <i>RF178</i>                   | Probable E3 ubiquitin-protein ligase BAH1-like                                       | 1.19   |
| <i>RMA1</i>                    | E3 ubiquitin-protein ligase RMA1                                                     | 3.59   |
| <i>RMA1H1</i>                  | E3 ubiquitin-protein ligase RMA1H1                                                   | -2.15  |
| <i>RMR2</i>                    | Receptor homology region, transmembrane domain- and RING domain-containing protein 2 | 2.62   |
| <i>RPN11</i>                   | 26S proteasome non-ATPase regulatory subunit 14 homolog                              | 2.49   |
| <i>RPN6</i>                    | 26S proteasome non-ATPase regulatory subunit 11 homolog                              | 8.55   |
| <i>SCPL25</i>                  | Serine carboxypeptidase-like 25                                                      | 4.76   |
| <i>SCPL29</i>                  | Serine carboxypeptidase-like 29                                                      | -1.49  |
| <i>SCPL31</i>                  | Serine carboxypeptidase-like 31                                                      | -3.64  |
| <i>SCPL40</i>                  | Serine carboxypeptidase-like 40                                                      | -2.82  |
| <i>SCPL45</i>                  | Serine carboxypeptidase-like 45                                                      | 1.53   |
| <i>SGR9</i>                    | E3 ubiquitin-protein ligase SGR9, amyloplastic                                       | 3.03   |
| <i>SKIP2</i>                   | F-box protein SKIP2                                                                  | 3.55   |
| <i>SKIP32</i>                  | F-box protein 7                                                                      | -1.07  |
| <i>SMXL3</i>                   | Protein SMAX1-LIKE 3                                                                 | 1.29   |
| <i>SMXL4</i>                   | Protein SMAX1-LIKE 4                                                                 | 2.01   |
| <i>TUN</i>                     | UDP-glycosyltransferase TURAN                                                        | -1.54  |
| <i>UBC</i>                     | Polyubiquitin-C                                                                      | -3.83  |
| <i>UBC1</i>                    | Ubiquitin-conjugating enzyme E2 1                                                    | 2.81   |
| <i>UBC10</i>                   | Ubiquitin-conjugating enzyme E2 10                                                   | 2.46   |
| <i>UBC11</i>                   | Ubiquitin-conjugating enzyme E2 11                                                   | 3.56   |
| <i>UBC16</i>                   | Probable ubiquitin-conjugating enzyme E2 16                                          | -1.73  |
| <i>UBC19</i>                   | Ubiquitin-conjugating enzyme E2 19                                                   | 3.32   |
| <i>UBC36</i>                   | Ubiquitin-conjugating enzyme E2 36                                                   | -1.38  |
| <i>UBC9</i>                    | SUMO-conjugating enzyme UBC9                                                         | 2.05   |
| <i>UBQ10</i>                   | Polyubiquitin 10                                                                     | 5.39   |
| <i>XB3</i>                     | E3 ubiquitin-protein ligase XB3                                                      | 2.73   |
| <b>Nucleic acid metabolism</b> |                                                                                      |        |
| <i>AAH</i>                     | Allantoate deiminase                                                                 | 3.44   |
| <i>AAH2</i>                    | Allantoate deiminase 2                                                               | -1.29  |
| <i>CSLA9</i>                   | Glucomannan 4-beta-mannosyltransferase 9                                             | 1.37   |
| <i>CTGF</i>                    | CCN family member 2                                                                  | -9.94  |
| <i>DUT</i>                     | Deoxyuridine 5'-triphosphate nucleotidohydrolase                                     | 2.00   |
| <i>TK1A</i>                    | Thymidine kinase a                                                                   | 1.52   |

|                  |                                                                     |        |
|------------------|---------------------------------------------------------------------|--------|
| <i>PAB2</i>      | Polyadenylate-binding protein 2                                     | 2.74   |
| <i>qtrt1</i>     | Queuine tRNA-ribosyltransferase catalytic subunit 1                 | 1.79   |
| <i>RNR1</i>      | Ribonucleoside-diphosphate reductase large subunit                  | 1.20   |
| <i>RNS2</i>      | Ribonuclease 2                                                      | 2.84   |
| <i>TSO2</i>      | Ribonucleoside-diphosphate reductase small chain C                  | 1.79   |
| <i>txn</i>       | Thioredoxin                                                         | 9.32   |
| <i>XRN3</i>      | 5'-3' exoribonuclease 3                                             | -11.92 |
| <b>Others</b>    |                                                                     |        |
| <i>ABHD17B</i>   | Alpha/beta hydrolase domain-containing protein 17B                  | 1.62   |
| <i>abhd17c</i>   | Alpha/beta hydrolase domain-containing protein 17C                  | 3.89   |
| <i>AKR1</i>      | Probable aldo-keto reductase 1                                      | -2.76  |
| <i>AKR4C11</i>   | Aldose reductase                                                    | -2.89  |
| <i>AMPD</i>      | AMP deaminase                                                       | 1.17   |
| <i>AS</i>        | Hydroquinone glucosyltransferase                                    | -1.50  |
| <i>ASAT1</i>     | Acyl-CoA--sterol O-acyltransferase 1                                | -3.88  |
| <i>At1g08940</i> | Phosphoglycerate mutase-like protein AT74H                          | 4.44   |
| <i>At1g30700</i> | Berberine bridge enzyme-like 8                                      | 2.40   |
| <i>At2g26230</i> | Uricase                                                             | 3.25   |
| <i>At3g03980</i> | NADPH-dependent aldehyde reductase-like protein, chloroplastic      | 3.38   |
| <i>At3g16150</i> | Probable isoaspartyl peptidase/L-asparaginase 2                     | 3.18   |
| <i>At3g50280</i> | Uncharacterized acetyltransferase At3g50280                         | -1.07  |
| <i>At4g17486</i> | DeSI-like protein At4g17486                                         | 9.99   |
| <i>At4g20840</i> | Berberine bridge enzyme-like 21                                     | -2.87  |
| <i>At4g33920</i> | Probable protein phosphatase 2C 63                                  | 4.12   |
| <i>At5g06060</i> | Tropinone reductase homolog At5g06060                               | -2.85  |
| <i>At5g07800</i> | Flavin-containing monooxygenase FMO GS-OX-like 9                    | 1.20   |
| <i>At5g08100</i> | Isoaspartyl peptidase/L-asparaginase                                | 3.44   |
| <i>At5g34940</i> | Heparanase-like protein 3                                           | 2.35   |
| <i>At5g61250</i> | Heparanase-like protein 2                                           | 2.67   |
| <i>At5g37990</i> | Probable S-adenosylmethionine-dependent methyltransferase At5g37990 | -1.49  |
| <i>BFRUCT3</i>   | Acid beta-fructofuranosidase 3, vacuolar                            | 2.80   |
| <i>BH0283</i>    | Uncharacterized isomerase BH0283                                    | 2.86   |
| <i>BTG-26</i>    | Aldehyde dehydrogenase family 7 member A1                           | 3.11   |
| <i>CCT1</i>      | Choline-phosphate cytidyltransferase 1                              | 4.07   |
| <i>CDA1</i>      | Cytidine deaminase 1                                                | 1.23   |
| <i>CEQORH</i>    | Chloroplast envelope quinone oxidoreductase homolog                 | 1.08   |
| <i>CER1</i>      | Very-long-chain aldehyde decarbonylase CER1                         | 5.86   |
| <i>clpP</i>      | ATP-dependent Clp protease proteolytic subunit                      | -9.28  |
| <i>COAE</i>      | Dephospho-CoA kinase                                                | 1.07   |
| <i>CST3</i>      | Cystatin                                                            | 9.58   |
| <i>CST3</i>      | Cystatin-C                                                          | -10.53 |
| <i>CXE17</i>     | Probable carboxylesterase 17                                        | -1.96  |
| <i>DBR</i>       | 2-alkenal reductase (NADP(+)-dependent)                             | 2.28   |
| <i>CYP73A5</i>   | Trans-cinnamate 4-monooxygenase                                     | 2.13   |
| <i>CYP81E8</i>   | Cytochrome P450 81E8                                                | 1.55   |
| <i>CYP82A3</i>   | Cytochrome P450 82A3                                                | -2.50  |
| <i>CYSEP</i>     | Vignain                                                             | 1.32   |
| <i>DIM</i>       | Delta(24)-sterol reductase                                          | 1.17   |
| <i>DOG1</i>      | DELAY OF GERMINATION 1                                              | 1.93   |
| <i>F3H-3</i>     | Flavanone 3-dioxygenase 3                                           | 2.68   |

|                     |                                                                                               |       |
|---------------------|-----------------------------------------------------------------------------------------------|-------|
| <i>FXG1</i>         | Alpha-L-fucosidase 3                                                                          | -3.11 |
| <i>GAPN</i>         | NADP-dependent glyceraldehyde-3-phosphate dehydrogenase                                       | -1.18 |
| <i>Gba2</i>         | Non-lysosomal glucosylceramidase                                                              | 1.08  |
| <i>GLCNAC1PUT1</i>  | UDP-N-acetylglucosamine diphosphorylase 1                                                     | 1.37  |
| <i>GLCAT14A</i>     | Beta-glucuronosyltransferase GlcAT14A                                                         | -1.10 |
| <i>GLOX</i>         | Aldehyde oxidase GLOX                                                                         | -1.46 |
| <i>GPX6</i>         | Probable phospholipid hydroperoxide glutathione peroxidase 6, mitochondrial                   | 2.48  |
| <i>GRXC9</i>        | Glutaredoxin-C9                                                                               | 13.18 |
| <i>GT6</i>          | UDP-glucose flavonoid 3-O-glucosyltransferase 6                                               | 7.66  |
| <i>guaA</i>         | Probable GMP synthase [glutamine-hydrolyzing]                                                 | 1.83  |
| <i>HAL3A</i>        | Phosphopantothenoylcysteine decarboxylase                                                     | 2.33  |
| <i>Hdh3</i>         | Haloacid dehalogenase-like hydrolase domain-containing protein 3                              | 3.48  |
| <i>HPPR</i>         | Hydroxyphenylpyruvate reductase                                                               | 4.39  |
| <i>hsp90ab1</i>     | Heat shock protein HSP 90-beta                                                                | 10.04 |
| <i>HST</i>          | Shikimate O-hydroxycinnamoyltransferase                                                       | 1.16  |
| <i>ICL</i>          | Isocitrate lyase                                                                              | 3.47  |
| <i>KTI2</i>         | Miraculin                                                                                     | -2.47 |
| <i>LARP1A</i>       | La-related protein 1A                                                                         | 4.26  |
| <i>LECRK1</i>       | G-type lectin S-receptor-like serine/threonine-protein kinase LECRK1                          | 1.97  |
| <i>LGALS1</i>       | Galectin-1                                                                                    | -9.97 |
| <i>LGALS1</i>       | Beta-galactoside-binding lectin                                                               | 10.96 |
| <i>LUG</i>          | Transcriptional corepressor LEUNIG                                                            | -1.74 |
| <i>LUH</i>          | Transcriptional corepressor LEUNIG_HOMOLOG                                                    | 2.77  |
| <i>maa</i>          | Probable maltose O-acetyltransferase                                                          | 1.75  |
| <i>MLS</i>          | Malate synthase, glyoxysomal                                                                  | -5.23 |
| <i>NDB2</i>         | External alternative NAD(P)H-ubiquinone oxidoreductase B2, mitochondrial                      | -2.49 |
| <i>NUDT17</i>       | Nudix hydrolase 17, mitochondrial                                                             | -4.39 |
| <i>OMT3</i>         | Probable O-methyltransferase 3                                                                | -4.60 |
| <i>OsI_27030</i>    | 1-Cys peroxiredoxin                                                                           | -2.08 |
| <i>P2A12</i>        | F-box protein PP2-A12                                                                         | -1.11 |
| <i>PDCB2</i>        | PLASMODESMATA CALLOSE-BINDING PROTEIN 2                                                       | 1.14  |
| <i>PEC-2</i>        | Thioredoxin H-type                                                                            | 2.01  |
| <i>PER52</i>        | Peroxidase 52                                                                                 | -3.30 |
| <i>PLL5</i>         | Probable protein phosphatase 2C 4                                                             | -1.57 |
| <i>PTEN1</i>        | Phosphatidylinositol 3,4,5-trisphosphate 3-phosphatase and protein-tyrosine-phosphatase PTEN1 | -1.46 |
| <i>PUX4</i>         | Plant UBX domain-containing protein 4                                                         | -1.78 |
| <i>Pyroxd2</i>      | Pyridine nucleotide-disulfide oxidoreductase domain-containing protein 2                      | 2.24  |
| <i>PYROXD2</i>      | Pyridine nucleotide-disulfide oxidoreductase domain-containing protein 2                      | 1.22  |
| <i>QCT</i>          | Glutaminyl-peptide cyclotransferase                                                           | 1.17  |
| <i>RBL5</i>         | RHOMBOID-like protein 5                                                                       | -1.70 |
| <i>RCOM_0699480</i> | Glycosyltransferase family 92 protein RCOM_0530710                                            | 1.17  |
| <i>ROD1</i>         | Phosphatidylcholine:diacylglycerol cholinephosphotransferase 1                                | 1.76  |
| <i>SBT1.3</i>       | Subtilisin-like protease SBT1.3                                                               | -3.11 |
| <i>SDH6</i>         | Succinate dehydrogenase subunit 6, mitochondrial                                              | -6.11 |
| <i>SEN102</i>       | Thiol protease SEN102                                                                         | 2.06  |
| <i>SERPINB6</i>     | Serpin B6                                                                                     | 10.35 |

|                 |                                                   |       |
|-----------------|---------------------------------------------------|-------|
| <i>SERPINH1</i> | Serpin H1                                         | -8.95 |
| <i>SQD1</i>     | UDP-sulfoquinovose synthase, chloroplastic        | 1.16  |
| <i>SSL10</i>    | Protein STRICTOSIDINE SYNTHASE-LIKE 10            | 1.61  |
| <i>STR17</i>    | Rhodanese-like domain-containing protein 17       | 2.81  |
| <i>TBL39</i>    | Protein trichome birefringence-like 39            | 1.43  |
| <i>TBL6</i>     | Protein trichome birefringence-like 6             | -1.20 |
| <i>TKL-1</i>    | Transketolase-1, chloroplastic                    | 8.92  |
| <i>TOGT1</i>    | Scopoletin glucosyltransferase                    | -1.21 |
| <i>TPP1</i>     | Thylakoidal processing peptidase 1, chloroplastic | 3.33  |
| <i>UREG</i>     | Urease accessory protein G                        | 2.92  |

---

**Table S3.** Transport genes differentially expressed in CR and CS.

| Gene name                      | Protein name                                         | log <sub>2</sub> Ratio (CR/CS) |
|--------------------------------|------------------------------------------------------|--------------------------------|
| <b>Transmembrane transport</b> |                                                      |                                |
| <i>ABCB19</i>                  | ABC transporter B family member 19                   | 4.07                           |
| <i>ABCB2</i>                   | ABC transporter B family member 2                    | -1.18                          |
| <i>ABCB9</i>                   | ABC transporter B family member 9                    | 2.47                           |
| <i>ABCC10</i>                  | ABC transporter C family member 10                   | -1.79                          |
| <i>ABCC3</i>                   | ABC transporter C family member 3                    | -2.09                          |
| <i>ABCF1</i>                   | ABC transporter F family member 1                    | -1.25                          |
| <i>ABCG1</i>                   | ABC transporter G family member 1                    | 1.14                           |
| <i>ABCG15</i>                  | ABC transporter G family member 15                   | 2.03                           |
| <i>ABCG31</i>                  | ABC transporter G family member 31                   | 4.35                           |
| <i>ABCG35</i>                  | ABC transporter G family member 35                   | -2.86                          |
| <i>ABCG39</i>                  | ABC transporter G family member 39                   | -1.33                          |
| <i>ABCG39</i>                  | ABC transporter G family member 39                   | -1.87                          |
| <i>ABCG5</i>                   | ABC transporter G family member 5                    | 2.61                           |
| <i>ABCG51</i>                  | ABC transporter G family member 51                   | -1.59                          |
| <i>ABCG9</i>                   | ABC transporter G family member 9                    | 1.64                           |
| <i>ACA12</i>                   | Calcium-transporting ATPase 12, plasma membrane-type | 9.37                           |
| <i>ACT1</i>                    | Actin-1                                              | 1.80                           |
| <i>ACTA1</i>                   | Actin, alpha skeletal muscle                         | -11.81                         |
| <i>actba</i>                   | Actin, cytoplasmic 1                                 | 3.86                           |
| <i>ACTG1</i>                   | Actin, cytoplasmic 2                                 | -3.46                          |
| <i>ACTG2</i>                   | Actin, alpha cardiac muscle 2                        | -5.96                          |
| <i>AHA4</i>                    | ATPase 4, plasma membrane-type                       | 3.77                           |
| <i>AHA6</i>                    | ATPase 6, plasma membrane-type                       | -3.40                          |
| <i>AHA9</i>                    | ATPase 9, plasma membrane-type                       | -1.22                          |
| <i>ANT1</i>                    | ADP,ATP carrier protein 1, mitochondrial             | 1.10                           |
| <i>At1g09380</i>               | WAT1-related protein At1g09380                       | 8.96                           |
| <i>At4g08290</i>               | WAT1-related protein At4g08290                       | -9.03                          |
| <i>At4g08300</i>               | WAT1-related protein At4g08300                       | 11.94                          |
| <i>At5g47470</i>               | WAT1-related protein At5g47470                       | -1.77                          |
| <i>At5g57480</i>               | AAA-ATPase At5g57480                                 | 2.76                           |
| <i>BOR1</i>                    | Boron transporter 1                                  | 1.87                           |
| <i>BOR3</i>                    | Probable boron transporter 3                         | 2.04                           |
| <i>BOR4</i>                    | Boron transporter 4                                  | 2.28                           |
| <i>BOR6</i>                    | Probable boron transporter 6                         | 4.20                           |
| <i>DDB_G0281815</i>            | Golgi to ER traffic protein 4 homolog                | 1.33                           |
| <i>DIT1</i>                    | Dicarboxylate transporter 1, chloroplastic           | -1.13                          |
| <i>DTX25</i>                   | Protein DETOXIFICATION 25                            | -1.96                          |
| <i>DTX28</i>                   | Protein DETOXIFICATION 28                            | -3.22                          |
| <i>DTX29</i>                   | Protein DETOXIFICATION 29                            | -1.33                          |
| <i>DTX31</i>                   | Protein DETOXIFICATION 31                            | -6.16                          |
| <i>DTX33</i>                   | Protein DETOXIFICATION 33                            | -1.07                          |
| <i>DTX40</i>                   | Protein DETOXIFICATION 40                            | -3.41                          |
| <i>DTX42</i>                   | Protein DETOXIFICATION 42                            | -1.04                          |
| <i>DTX48</i>                   | Protein DETOXIFICATION 48                            | 3.40                           |
| <i>DTX49</i>                   | Protein DETOXIFICATION 49                            | -5.37                          |
| <i>DTX55</i>                   | Protein DETOXIFICATION 55                            | 2.45                           |

|                               |                                                                |       |
|-------------------------------|----------------------------------------------------------------|-------|
| <i>EXO84A</i>                 | Exocyst complex component EXO84A                               | 1.06  |
| <i>NDT1</i>                   | Nicotinamide adenine dinucleotide transporter 1, chloroplastic | -8.15 |
| <i>PDR1</i>                   | Pleiotropic drug resistance protein 1                          | -2.52 |
| <i>SAR1A</i>                  | GTP-binding protein SAR1A                                      | 3.11  |
| <i>SAR1B</i>                  | GTP-binding protein SAR1B                                      | 2.89  |
| <i>sec14</i>                  | Sec14 cytosolic factor                                         | 2.34  |
| <i>Slc25a3</i>                | Phosphate carrier protein, mitochondrial                       | 10.10 |
| <i>SLC25A3</i>                | Phosphate carrier protein, mitochondrial                       | 8.86  |
| <i>SULTR3;4</i>               | Probable sulfate transporter 3.4                               | 1.99  |
| <i>SULTR3;5</i>               | Probable sulfate transporter 3.5                               | -2.53 |
| <i>VTI11</i>                  | Vesicle transport v-SNARE 11                                   | 4.51  |
| <i>VTI13</i>                  | Vesicle transport v-SNARE 13                                   | -2.38 |
| <b>Carbohydrate transport</b> |                                                                |       |
| <i>At1g67300</i>              | Probable plastidic glucose transporter 2                       | 1.12  |
| <i>At1g75220</i>              | Sugar transporter ERD6-like 6                                  | 1.21  |
| <i>At1g78830</i>              | EP1-like glycoprotein 2                                        | 4.00  |
| <i>At1g78850</i>              | EP1-like glycoprotein 3                                        | 3.56  |
| <i>At4g32390</i>              | Probable sugar phosphate/phosphate translocator At4g32390      | 2.19  |
| <i>At5g11230</i>              | Probable sugar phosphate/phosphate translocator At5g11230      | -4.17 |
| <i>EP1</i>                    | Epidermis-specific secreted glycoprotein EP1                   | -5.42 |
| <i>ERD6</i>                   | Sugar transporter ERD6                                         | 2.47  |
| <i>EULS3</i>                  | Ricin B-like lectin EULS3                                      | 4.42  |
| <i>MST1</i>                   | Sugar transport protein MST1                                   | -1.09 |
| <i>PLT5</i>                   | Polyol transporter 5                                           | -2.31 |
| <i>PLT6</i>                   | Probable polyol transporter 6                                  | -1.92 |
| <i>slc37a2</i>                | Glucose-6-phosphate exchanger SLC37A2                          | -3.84 |
| <i>slc37a2</i>                | Glucose-6-phosphate exchanger SLC37A2                          | 3.05  |
| <i>Slc37a2</i>                | Glucose-6-phosphate exchanger SLC37A2                          | -1.13 |
| <i>STP1</i>                   | Sugar transport protein 1                                      | 8.84  |
| <i>STP12</i>                  | Sugar transport protein 12                                     | 5.61  |
| <i>STP13</i>                  | Sugar transport protein 13                                     | 3.28  |
| <i>STP5</i>                   | Sugar transport protein 5                                      | -1.29 |
| <i>SWEET12</i>                | Bidirectional sugar transporter SWEET12                        | -2.05 |
| <i>SWEET14</i>                | Bidirectional sugar transporter SWEET14                        | 1.57  |
| <i>SWEET15</i>                | Bidirectional sugar transporter SWEET15                        | 9.57  |
| <i>SWEET5</i>                 | Bidirectional sugar transporter SWEET5                         | 2.05  |
| <i>UXT2</i>                   | UDP-xylose transporter 2                                       | 1.71  |
| <i>UXT3</i>                   | UDP-xylose transporter 3                                       | -1.82 |
| <b>lipid transport</b>        |                                                                |       |
| <i>N/A</i>                    | Non-specific lipid-transfer protein                            | 2.88  |
| <i>AATL1</i>                  | Lysine histidine transporter-like 8                            | 3.11  |
| <i>ABCA2</i>                  | ABC transporter A family member 2                              | -3.19 |
| <i>ABCA7</i>                  | ABC transporter A family member 7                              | -1.76 |
| <i>ALA2</i>                   | Phospholipid-transporting ATPase 2                             | 1.91  |
| <i>ALIS1</i>                  | ALA-interacting subunit 1                                      | 4.45  |
| <i>LTP10</i>                  | Non-specific lipid-transfer protein 3                          | 3.41  |
| <i>LTPG1</i>                  | Non-specific lipid transfer protein GPI-anchored 1             | 3.17  |
| <i>MALD3</i>                  | Non-specific lipid-transfer protein                            | 4.55  |
| <i>PATL4</i>                  | Patellin-4                                                     | 2.03  |
| <i>PEX13</i>                  | Peroxisomal membrane protein 13                                | 8.74  |
| <i>PEX6</i>                   | Peroxisome biogenesis protein 6                                | -1.94 |

|                             |                                                               |        |
|-----------------------------|---------------------------------------------------------------|--------|
| <i>SCA</i>                  | Non-specific lipid-transfer protein                           | 2.52   |
| <i>SYT4</i>                 | Synaptotagmin-4                                               | 1.38   |
| <i>SYT5</i>                 | Synaptotagmin-5                                               | 3.27   |
| <b>Amino acid transport</b> |                                                               |        |
| <i>AAP2</i>                 | Amino acid permease 2                                         | 2.54   |
| <i>AAP3</i>                 | Amino acid permease 3                                         | -1.06  |
| <i>ANT1</i>                 | Amino acid transporter ANT1                                   | 4.49   |
| <i>At1g25530</i>            | Lysine histidine transporter-like 6                           | 9.12   |
| <i>At2g39510</i>            | WAT1-related protein At2g39510                                | 3.55   |
| <i>AVT1H</i>                | Amino acid transporter AVT1H                                  | -1.23  |
| <i>AVT6A</i>                | Amino acid transporter AVT6A                                  | -1.05  |
| <i>CAT1</i>                 | Cationic amino acid transporter 1                             | 1.93   |
| <i>CAT7</i>                 | Cationic amino acid transporter 7, chloroplastic              | 1.37   |
| <i>LHT1</i>                 | Lysine histidine transporter 1                                | -4.53  |
| <i>YPQ1</i>                 | Probable vacuolar amino acid transporter YPQ1                 | -1.18  |
| <b>Protein transport</b>    |                                                               |        |
| <i>14-3-3zeta</i>           | 14-3-3 protein zeta                                           | 9.50   |
| <i>AHB1</i>                 | Non-symbiotic hemoglobin 1                                    | 3.40   |
| <i>ahsa</i>                 | Activator of 90 kDa heat shock protein ATPase homolog         | 3.83   |
| <i>AKR2A</i>                | Ankyrin repeat domain-containing protein 2A                   | 3.44   |
| <i>AP2M1</i>                | AP-2 complex subunit mu                                       | 9.22   |
| <i>AP3BA</i>                | AP3-complex subunit beta-A                                    | -8.68  |
| <i>ARF2-A</i>               | ADP-ribosylation factor 2-A                                   | 3.67   |
| <i>ASNAP2</i>               | Alpha-soluble NSF attachment protein 2                        | 2.47   |
| <i>At1g21900</i>            | Transmembrane emp24 domain-containing protein p24delta5       | 2.75   |
| <i>At3g09030</i>            | BTB/POZ domain-containing protein At3g09030                   | -1.01  |
| <i>At3g13860</i>            | Chaperonin CPN60-like 2, mitochondrial                        | 1.04   |
| <i>At5g01750</i>            | Protein LURP-one-related 15                                   | 3.29   |
| <i>ATG1C</i>                | Serine/threonine-protein kinase ATG1c                         | 1.01   |
| <i>ATG8F</i>                | Autophagy-related protein 8f                                  | -1.02  |
| <i>CHC1</i>                 | Clathrin heavy chain 1                                        | 3.25   |
| <i>CLC2</i>                 | Clathrin light chain 2                                        | 2.99   |
| <i>GF14B</i>                | 14-3-3-like protein B                                         | 1.15   |
| <i>GF14C</i>                | 14-3-3-like protein GF14-C                                    | -3.76  |
| <i>GRF12</i>                | 14-3-3-like protein GF14 iota                                 | 1.16   |
| <i>HSPB1</i>                | Heat shock protein beta-1                                     | -10.39 |
| <i>IMPA1</i>                | Importin subunit alpha-1                                      | 1.22   |
| <i>KEU</i>                  | SNARE-interacting protein KEULE                               | 3.38   |
| <i>KN</i>                   | Syntaxin-related protein KNOLLE                               | 3.06   |
| <i>MON1</i>                 | Vacuolar fusion protein MON1 homolog                          | -1.06  |
| <i>MSBP2</i>                | Membrane steroid-binding protein 2                            | -1.46  |
| <i>naca</i>                 | Nascent polypeptide-associated complex subunit alpha          | 10.66  |
| <i>NACA</i>                 | Nascent polypeptide-associated complex subunit alpha          | -7.51  |
| <i>NBR1</i>                 | Protein NBR1 homolog                                          | 5.11   |
| <i>NTF2A</i>                | Nuclear transport factor 2A                                   | 2.09   |
| <i>NTF2B</i>                | Nuclear transport factor 2B                                   | 2.39   |
| <i>OEP16</i>                | Outer envelope pore protein 16, chloroplastic                 | -2.06  |
| <i>OEP163</i>               | Outer envelope pore protein 16-3, chloroplastic/mitochondrial | 8.32   |
| <i>Os12g0104800</i>         | Clathrin heavy chain 2                                        | 8.71   |
| <i>PAT05</i>                | Probable protein S-acyltransferase 5                          | 8.75   |
| <i>PAT18</i>                | Protein S-acyltransferase 18                                  | 2.06   |

|                            |                                                                  |       |
|----------------------------|------------------------------------------------------------------|-------|
| <i>RAB7</i>                | Ras-related protein Rab7                                         | -1.72 |
| <i>RABA1F</i>              | Ras-related protein RABA1f                                       | 1.81  |
| <i>RABA4A</i>              | Ras-related protein RABA4a                                       | 8.15  |
| <i>RABA6A</i>              | Ras-related protein RABA6a                                       | 4.51  |
| <i>RABB1C</i>              | Ras-related protein RABB1c                                       | 3.18  |
| <i>RABD2C</i>              | Ras-related protein RABD2c                                       | 2.58  |
| <i>RABF2A</i>              | Ras-related protein RABF2a                                       | 7.93  |
| <i>RABG3D</i>              | Ras-related protein RABG3d                                       | -1.56 |
| <i>RABG3F</i>              | Ras-related protein RABG3f                                       | 2.81  |
| <i>RBK2</i>                | Receptor-like cytosolic serine/threonine-protein kinase RBK2     | 2.34  |
| <i>RHN1</i>                | Ras-related protein RHN1                                         | -1.05 |
| <i>SEC1A</i>               | Protein transport Sec1a                                          | 5.33  |
| <i>sec61a</i>              | Protein transport protein Sec61 subunit alpha                    | 3.03  |
| <i>SEC61B</i>              | Protein transport protein Sec61 subunit beta                     | 8.93  |
| <i>SYN112</i>              | Syntaxin-112                                                     | 3.04  |
| <i>SYN121</i>              | Syntaxin-121                                                     | 8.61  |
| <i>SYN122</i>              | Syntaxin-122                                                     | 5.21  |
| <i>TIC214</i>              | Protein TIC 214                                                  | -3.46 |
| <i>TIC32</i>               | Short-chain dehydrogenase TIC 32, chloroplastic                  | -2.56 |
| <i>TMN11</i>               | Transmembrane 9 superfamily member 11                            | 8.31  |
| <i>TOL6</i>                | TOM1-like protein 6                                              | 8.72  |
| <i>TOL9</i>                | TOM1-like protein 9                                              | 1.00  |
| <i>TOM9-2</i>              | Mitochondrial import receptor subunit TOM9-2                     | 1.18  |
| <i>VAMP711</i>             | Vesicle-associated membrane protein 711                          | 4.60  |
| <i>VAMP722</i>             | Vesicle-associated membrane protein 722                          | 2.37  |
| <i>VAMP727</i>             | Vesicle-associated membrane protein 727                          | -1.26 |
| <i>ywhaba</i>              | 14-3-3 protein beta/alpha-A                                      | 9.70  |
| <i>VPS2.2</i>              | Vacuolar protein sorting-associated protein 2 homolog 2          | 1.02  |
| <i>VPS32.1</i>             | Vacuolar protein sorting-associated protein 32 homolog 1         | 2.63  |
| <i>VSR1</i>                | Vacuolar-sorting receptor 1                                      | 3.13  |
| <b>Metal ion transport</b> |                                                                  |       |
| <i>N/A</i>                 | Stellacyanin                                                     | -2.59 |
| <i>ABCG36</i>              | ABC transporter G family member 36                               | 3.02  |
| <i>AGD14</i>               | Probable ADP-ribosylation factor GTPase-activating protein AGD14 | 2.08  |
| <i>AKT1</i>                | Potassium channel AKT1                                           | -1.70 |
| <i>AKT6</i>                | Potassium channel AKT6                                           | 3.50  |
| <i>AOP1</i>                | Probable 2-oxoglutarate-dependent dioxygenase AOP1               | -2.19 |
| <i>AOP1.2</i>              | Probable 2-oxoglutarate-dependent dioxygenase AOP1.2             | -4.50 |
| <i>At1g06620</i>           | 1-aminocyclopropane-1-carboxylate oxidase homolog 1              | -1.01 |
| <i>At1g73020</i>           | Anoctamin-like protein At1g73020                                 | 1.07  |
| <i>At2g01810</i>           | PHD finger protein At2g01810                                     | -1.56 |
| <i>At2g44790</i>           | Uclacyanin-2                                                     | -9.23 |
| <i>At3g21360</i>           | Clavamine synthase-like protein At3g21360                        | 1.04  |
| <i>At3g43660</i>           | Vacuolar iron transporter homolog 4                              | 3.51  |
| <i>At3g54510</i>           | CSC1-like protein At3g54510                                      | 1.32  |
| <i>BCB</i>                 | Umecyanin                                                        | 2.80  |
| <i>Bp10</i>                | L-ascorbate oxidase homolog                                      | -3.63 |
| <i>CALR</i>                | Calreticulin                                                     | -9.70 |
| <i>CAT2</i>                | Catalase isozyme 2                                               | -1.07 |
| <i>CAX3</i>                | Vacuolar cation/proton exchanger 3                               | -2.15 |
| <i>CBSDUF1</i>             | DUF21 domain-containing protein At4g14240                        | -1.10 |



|                |                                                                         |        |
|----------------|-------------------------------------------------------------------------|--------|
| <i>CCS</i>     | Copper chaperone for superoxide dismutase, chloroplastic/cytosolic      | 3.18   |
| <i>CHX15</i>   | Cation/H(+) antiporter 15                                               | 1.39   |
| <i>CHX4</i>    | Cation/H(+) antiporter 4                                                | 1.41   |
| <i>CML3</i>    | Calmodulin-like protein 3                                               | 1.13   |
| <i>CML35</i>   | Probable calcium-binding protein CML35                                  | 3.55   |
| <i>CML50</i>   | Probable calcium-binding protein CML50                                  | 3.93   |
| <i>CNGC2</i>   | Cyclic nucleotide-gated ion channel 2                                   | 2.52   |
| <i>CNX1</i>    | Calnexin homolog 1                                                      | 2.68   |
| <i>CYB561D</i> | Probable transmembrane ascorbate ferrioreductase 4                      | 2.07   |
| <i>CYP79A2</i> | Phenylalanine N-monooxygenase                                           | 2.08   |
| <i>DRT112</i>  | Plastocyanin major isoform, chloroplastic                               | 10.97  |
| <i>ETFQO</i>   | Electron transfer flavoprotein-ubiquinone oxidoreductase, mitochondrial | 8.56   |
| <i>fcpA</i>    | Probable C-terminal domain small phosphatase                            | 1.49   |
| <i>FLS</i>     | Flavonol synthase/flavanone 3-hydroxylase                               | 9.70   |
| <i>FSD1</i>    | Superoxide dismutase [Fe] 1, chloroplastic                              | 1.80   |
| <i>FTH</i>     | Ferritin, heavy subunit                                                 | 9.85   |
| <i>FTH</i>     | Ferritin, middle subunit                                                | 11.47  |
| <i>FTH1</i>    | Ferritin heavy chain                                                    | -3.56  |
| <i>FTL</i>     | Ferritin light chain                                                    | -10.85 |
| <i>Ftl1</i>    | Ferritin light chain 1                                                  | -10.43 |
| <i>GCL2</i>    | LanC-like protein GCL2                                                  | 1.08   |
| <i>gp63</i>    | Leishmanolysin homolog                                                  | 4.80   |
| <i>GRXS7</i>   | Monothiol glutaredoxin-S7, chloroplastic                                | -1.20  |
| <i>HAK13</i>   | Probable potassium transporter 13                                       | -1.13  |
| <i>HB2</i>     | Non-symbiotic hemoglobin 2                                              | 1.39   |
| <i>HIPP05</i>  | Heavy metal-associated isoprenylated plant protein 5                    | 3.94   |
| <i>HIPP06</i>  | Heavy metal-associated isoprenylated plant protein 6                    | 2.28   |
| <i>HIPP09</i>  | Heavy metal-associated isoprenylated plant protein 9                    | 3.31   |
| <i>HIPP21</i>  | Heavy metal-associated isoprenylated plant protein 21                   | -1.29  |
| <i>HIPP23</i>  | Heavy metal-associated isoprenylated plant protein 23                   | 1.70   |
| <i>HIPP26</i>  | Heavy metal-associated isoprenylated plant protein 26                   | -1.85  |
| <i>HIPP32</i>  | Heavy metal-associated isoprenylated plant protein 32                   | 1.25   |
| <i>HIPP37</i>  | Heavy metal-associated isoprenylated plant protein 37                   | 1.89   |
| <i>HIPP39</i>  | Heavy metal-associated isoprenylated plant protein 39                   | -2.02  |
| <i>IQD1</i>    | Protein IQ-DOMAIN 1                                                     | 1.43   |
| <i>IRT2</i>    | Fe(2+) transport protein 2                                              | 6.57   |
| <i>KAT3</i>    | Potassium channel KAT3                                                  | 2.70   |
| <i>KEA4</i>    | K(+) efflux antiporter 4                                                | 1.03   |
| <i>LAC14</i>   | Laccase-14                                                              | -2.63  |
| <i>LAC6</i>    | Laccase-6                                                               | 2.00   |
| <i>LAC7</i>    | Laccase-7                                                               | -3.26  |
| <i>Lonrf3</i>  | LON peptidase N-terminal domain and RING finger protein 3               | 2.77   |
| <i>LSC30</i>   | Ferritin-1, chloroplastic                                               | 1.58   |
| <i>LTP1</i>    | Non-specific lipid-transfer protein 1                                   | 10.09  |
| <i>mcfB</i>    | Mitochondrial substrate carrier family protein B                        | -1.01  |
| <i>mgtA</i>    | Magnesium-transporting ATPase, P-type 1                                 | -1.29  |
| <i>MHB1</i>    | Non-symbiotic hemoglobin 1                                              | -2.02  |
| <i>MICU</i>    | Calcium uptake protein, mitochondrial                                   | 3.51   |
| <i>MT3</i>     | Metallothionein-like protein type 3                                     | 4.82   |
| <i>MT4B</i>    | Metallothionein-like protein 4B                                         | 4.11   |

|                          |                                                     |        |
|--------------------------|-----------------------------------------------------|--------|
| <i>MTP4</i>              | Metal tolerance protein 4                           | -2.51  |
| <i>NAKR2</i>             | Protein SODIUM POTASSIUM ROOT DEFECTIVE 2           | 7.85   |
| <i>NRAMP3</i>            | Metal transporter Nramp3                            | -1.24  |
| <i>NRAMP6</i>            | Metal transporter Nramp6                            | -1.23  |
| <i>NUDT16</i>            | Nudix hydrolase 16, mitochondrial                   | 1.35   |
| <i>NUDT21</i>            | Nudix hydrolase 21, chloroplastic                   | 4.97   |
| <i>OBE3</i>              | Protein OBERON 3                                    | 3.28   |
| <i>OPT3</i>              | Oligopeptide transporter 3                          | -2.05  |
| <i>PAP18</i>             | Purple acid phosphatase 18                          | 5.17   |
| <i>PAP2</i>              | Purple acid phosphatase 2                           | 1.56   |
| <i>PAP27</i>             | Probable inactive purple acid phosphatase 27        | 1.07   |
| <i>pdcA</i>              | Pyruvate decarboxylase                              | 2.09   |
| <i>PETE</i>              | Plastocyanin, chloroplastic                         | 3.41   |
| <i>PETF</i>              | Ferredoxin                                          | 9.83   |
| <i>NHX2</i>              | Sodium/hydrogen exchanger 2                         | 1.78   |
| <i>NIP1</i>              | NEP1-interacting protein 1                          | 8.72   |
| <i>pKIWI504</i>          | Metallothionein-like protein type 2                 | -1.47  |
| <i>PSBQ1</i>             | Oxygen-evolving enhancer protein 3-1, chloroplastic | 10.15  |
| <i>PSBQ2</i>             | Oxygen-evolving enhancer protein 3-2, chloroplastic | 9.40   |
| <i>Pvalb</i>             | Parvalbumin alpha                                   | -10.53 |
| <i>S100A4</i>            | Ictacalcin                                          | 11.55  |
| <i>Sftpa1</i>            | Pulmonary surfactant-associated protein A           | -9.09  |
| <i>SKU5</i>              | Monocopper oxidase-like protein SKU5                | 1.16   |
| <i>SOP1</i>              | Peroxygenase                                        | -5.35  |
| <i>SPARC</i>             | SPARC                                               | -7.27  |
| <i>THBS1</i>             | Thrombospondin-1                                    | -12.10 |
| <i>VIT_05s0020g01830</i> | CASP-like protein 1D1                               | -2.25  |
| <i>VIT_07s0104g01350</i> | CASP-like protein 1E1                               | 5.55   |
| <i>VIT_09s0002g03780</i> | CASP-like protein 3A1                               | 1.23   |
| <i>VIT_14s0068g01400</i> | CASP-like protein 1F2                               | 2.15   |
| <i>ZIFL1</i>             | Protein ZINC INDUCED FACILITATOR-LIKE 1             | -2.24  |
| <i>ZIP10</i>             | Probable zinc transporter 10                        | -8.62  |
| <i>ZIP3</i>              | Zinc transporter 3                                  | -2.24  |
| <b>Others</b>            |                                                     |        |
| <i>7-Oct</i>             | Organic cation/carnitine transporter 7              | -1.37  |
| <i>N/A</i>               | Pathogen-related protein                            | 1.25   |
| <i>N/A</i>               | Polyprotein P3                                      | 2.97   |
| <i>N/A</i>               | Probable cytochrome c biosynthesis protein          | 12.80  |
| <i>N/A</i>               | RNA2 polyprotein                                    | -13.34 |
| <i>ALMT10</i>            | Aluminum-activated malate transporter 10            | -2.19  |
| <i>ALMT12</i>            | Aluminum-activated malate transporter 12            | -9.80  |
| <i>ALMT13</i>            | Aluminum-activated malate transporter 13            | -10.99 |
| <i>arv1</i>              | Protein arv1 homolog                                | 1.16   |
| <i>At1g02270</i>         | Uncharacterized calcium-binding protein At1g02270   | 4.18   |
| <i>At2g25060</i>         | Early nodulin-like protein 1                        | 11.75  |
| <i>At3g01520</i>         | Universal stress protein A-like protein             | 9.24   |
| <i>At3g28850</i>         | Uncharacterized protein At3g28850                   | 2.94   |
| <i>At4g26020</i>         | Protein At-4/1                                      | 1.82   |
| <i>At4g27520</i>         | Early nodulin-like protein 2                        | 3.27   |
| <i>At5g25090</i>         | Early nodulin-like protein 3                        | 2.97   |
| <i>At5g39570</i>         | Uncharacterized protein At5g39570                   | 2.49   |

|                  |                                                            |        |
|------------------|------------------------------------------------------------|--------|
| <i>At5g39865</i> | Uncharacterized protein At5g39865                          | 2.14   |
| <i>ATP5MC3</i>   | ATP synthase F(0) complex subunit C3, mitochondrial        | 10.17  |
| <i>ATPA</i>      | ATP synthase subunit alpha, mitochondrial                  | 3.74   |
| <i>AVP1</i>      | Pyrophosphate-energized vacuolar membrane proton pump 1    | 9.37   |
| <i>AZG2</i>      | Adenine/guanine permease AZG2                              | -1.30  |
| <i>BAC2</i>      | Mitochondrial arginine transporter BAC2                    | -1.64  |
| <i>CD9</i>       | CD9 antigen                                                | 9.66   |
| <i>CIPK6</i>     | CBL-interacting serine/threonine-protein kinase 6          | 3.31   |
| <i>CPR</i>       | NADPH--cytochrome P450 reductase                           | -1.66  |
| <i>CURT1B</i>    | Protein CURVATURE THYLAKOID 1B, chloroplastic              | 9.07   |
| <i>CXXS1</i>     | Thioredoxin-like protein CXXS1                             | 8.75   |
| <i>ECH</i>       | Golgi apparatus membrane protein-like protein ECHIDNA      | -1.79  |
| <i>ENODL1</i>    | Early nodulin-like protein 1                               | 2.12   |
| <i>ENT3</i>      | Equilibrative nucleotide transporter 3                     | 1.52   |
| <i>ETFB</i>      | Electron transfer flavoprotein subunit beta, mitochondrial | 1.70   |
| <i>FATB1</i>     | Palmitoyl-acyl carrier protein thioesterase, chloroplastic | 1.43   |
| <i>FH11</i>      | Formin-like protein 11                                     | 1.02   |
| <i>GRXC3</i>     | Glutaredoxin-C3                                            | 2.92   |
| <i>GRXC6</i>     | Glutaredoxin-C6                                            | 2.48   |
| <i>INT1</i>      | Inositol transporter 1                                     | -1.05  |
| <i>INT2</i>      | Probable inositol transporter 2                            | -2.45  |
| <i>MBD10</i>     | Methyl-CpG-binding domain-containing protein 10            | 2.88   |
| <i>MSL10</i>     | Mechanosensitive ion channel protein 10                    | 1.21   |
| <i>Mtstp6</i>    | ATP synthase subunit a                                     | -12.08 |
| <i>MT-ATP6</i>   | ATP synthase subunit a                                     | -10.24 |
| <i>Mtnd2</i>     | NADH-ubiquinone oxidoreductase chain 2                     | -10.29 |
| <i>MT-ND2</i>    | NADH-ubiquinone oxidoreductase chain 2                     | 11.58  |
| <i>Mtnd4</i>     | NADH-ubiquinone oxidoreductase chain 4                     | -10.50 |
| <i>MT-ND4L</i>   | NADH-ubiquinone oxidoreductase chain 4L                    | -10.33 |
| <i>Mtnd5</i>     | NADH-ubiquinone oxidoreductase chain 5                     | -9.45  |
| <i>MT-ND5</i>    | NADH-ubiquinone oxidoreductase chain 5                     | -10.20 |
| <i>NIK1</i>      | Protein NSP-INTERACTING KINASE 1                           | 2.45   |
| <i>NPF1.2</i>    | Protein NRT1/ PTR FAMILY 1.2                               | -4.17  |
| <i>NPF2.11</i>   | Protein NRT1/ PTR FAMILY 2.11                              | -1.03  |
| <i>NPF2.13</i>   | Protein NRT1/ PTR FAMILY 2.13                              | -2.59  |
| <i>NPF5.2</i>    | Protein NRT1/ PTR FAMILY 5.2                               | 1.44   |
| <i>NPF5.6</i>    | Protein NRT1/ PTR FAMILY 5.6                               | -3.92  |
| <i>NPF6.3</i>    | Protein NRT1/ PTR FAMILY 6.3                               | 2.95   |
| <i>NPF6.4</i>    | Protein NRT1/ PTR FAMILY 6.4                               | 2.37   |
| <i>NRG2</i>      | Nitrate regulatory gene2 protein                           | 3.46   |
| <i>NRT3.1</i>    | High-affinity nitrate transporter 3.1                      | -3.87  |
| <i>PHO1;H3</i>   | Phosphate transporter PHO1 homolog 3                       | -1.39  |
| <i>PHO1-1</i>    | Phosphate transporter PHO1-1                               | 2.82   |
| <i>PHO1-H1</i>   | Phosphate transporter PHO1 homolog 1                       | 3.17   |
| <i>PHO1-H5</i>   | Phosphate transporter PHO1 homolog 5                       | -1.57  |
| <i>pho-5</i>     | Repressible high-affinity phosphate permease               | 9.08   |
| <i>PHT1-11</i>   | Inorganic phosphate transporter 1-11                       | 3.50   |
| <i>PHT1-4</i>    | Inorganic phosphate transporter 1-4                        | 1.53   |
| <i>PILS2</i>     | Protein PIN-LIKES 2                                        | -4.37  |
| <i>PIN1A</i>     | Auxin efflux carrier component 1a                          | 2.08   |
| <i>PIN3</i>      | Auxin efflux carrier component 3                           | 2.03   |

|                |                                             |        |
|----------------|---------------------------------------------|--------|
| <i>PIN8</i>    | Auxin efflux carrier component 8            | 3.32   |
| <i>PIP1-3</i>  | Aquaporin PIP1-3                            | 1.12   |
| <i>PIP2-7</i>  | Aquaporin PIP2-7                            | 1.98   |
| <i>PIP5K6</i>  | Phosphatidylinositol 4-phosphate 5-kinase 6 | 1.53   |
| <i>PME110</i>  | 21 kDa protein                              | 3.26   |
| <i>PRA1B4</i>  | PRA1 family protein B4                      | 3.22   |
| <i>PRA1F2</i>  | PRA1 family protein F2                      | 1.20   |
| <i>PRDX1</i>   | Peroxiredoxin                               | 9.24   |
| <i>PUP11</i>   | Probable purine permease 11                 | 1.67   |
| <i>PUP14</i>   | Purine permease 14                          | 4.23   |
| <i>rraA</i>    | Regulator of ribonuclease activity A        | 2.78   |
| <i>Sftpc</i>   | Pulmonary surfactant-associated protein C   | -11.64 |
| <i>SIP1-1</i>  | Aquaporin SIP1-1                            | -1.32  |
| <i>SLC25A5</i> | ADP/ATP translocase 2                       | 11.15  |
| <i>TBL19</i>   | Protein trichome birefringence-like 19      | 1.24   |
| <i>TDX</i>     | TPR repeat-containing thioredoxin TDX       | 1.39   |
| <i>WDR44</i>   | WD repeat-containing protein 44             | 1.48   |
| <i>ycf2</i>    | Protein Ycf2                                | -2.66  |
| <i>ycf2-A</i>  | Protein Ycf2                                | -1.16  |
| <i>ycf2-A</i>  | Protein Ycf2                                | 4.40   |
| <i>ycf2-A</i>  | Protein Ycf2                                | -2.83  |
| <i>ycf2-A</i>  | Protein Ycf2                                | -5.24  |
| <i>TIP1-3</i>  | Aquaporin TIP1-3                            | -2.84  |
| <i>TIP2-1</i>  | Aquaporin TIP2-1                            | 5.04   |
| <i>TUBB1</i>   | Tubulin beta-1 chain                        | 2.05   |
| <i>VHA-d2</i>  | V-type proton ATPase subunit d2             | -1.91  |

---

**Table S4.** Transcription genes factor differentially expressed in CR and CS.

| Gene name                    | Protein name                                           | log <sub>2</sub> Ratio<br>(CR/CS) |
|------------------------------|--------------------------------------------------------|-----------------------------------|
| <b>Transcription factors</b> |                                                        |                                   |
| <i>1-Sep</i>                 | Developmental protein SEPALLATA 1                      | 8.74                              |
| <i>AFP3</i>                  | Ninja-family protein AFP3                              | 1.21                              |
| <i>AG1</i>                   | Floral homeotic protein AGAMOUS                        | 9.61                              |
| <i>AG2</i>                   | Floral homeotic protein AGAMOUS                        | 7.24                              |
| <i>AGL15</i>                 | Agamous-like MADS-box protein AGL15                    | 3.63                              |
| <i>AHL1</i>                  | AT-hook motif nuclear-localized protein 1              | 1.68                              |
| <i>AHL10</i>                 | AT-hook motif nuclear-localized protein 10             | 1.14                              |
| <i>AHL17</i>                 | AT-hook motif nuclear-localized protein 17             | -2.51                             |
| <i>AHL23</i>                 | AT-hook motif nuclear-localized protein 23             | -2.60                             |
| <i>AHL26</i>                 | AT-hook motif nuclear-localized protein 26             | -2.45                             |
| <i>AHL5</i>                  | AT-hook motif nuclear-localized protein 5              | 1.76                              |
| <i>AIL1</i>                  | AP2-like ethylene-responsive transcription factor AIL1 | 4.64                              |
| <i>AIL6</i>                  | AP2-like ethylene-responsive transcription factor AIL6 | 3.14                              |
| <i>AMS</i>                   | Transcription factor ABORTED MICROSPORES               | 6.25                              |
| <i>ANL2</i>                  | Homeobox-leucine zipper protein ANTHOCYANINLESS<br>2   | 2.95                              |
| <i>ANT</i>                   | AP2-like ethylene-responsive transcription factor ANT  | 2.08                              |
| <i>AP1</i>                   | Floral homeotic protein APETALA 1                      | 5.10                              |
| <i>AP1</i>                   | Floral homeotic protein APETALA 1                      | 8.17                              |
| <i>AP2</i>                   | Floral homeotic protein APETALA 2                      | 1.74                              |
| <i>ARF17</i>                 | Auxin response factor 17                               | 1.41                              |
| <i>ARF31</i>                 | B3 domain-containing protein At2g36080                 | 1.44                              |
| <i>ARF8</i>                  | Auxin response factor 8                                | 1.29                              |
| <i>At5g14285</i>             | B3 domain-containing protein At2g36080                 | 10.29                             |
| <i>At5g42700</i>             | B3 domain-containing protein At5g42700                 | 2.51                              |
| <i>ATHB-12</i>               | Homeobox-leucine zipper protein ATHB-12                | 5.89                              |
| <i>ATHB-20</i>               | Homeobox-leucine zipper protein ATHB-20                | 3.93                              |
| <i>ATHB-40</i>               | Homeobox-leucine zipper protein ATHB-40                | 1.38                              |
| <i>ATHB-6</i>                | Homeobox-leucine zipper protein ATHB-6                 | 2.11                              |
| <i>BEH2</i>                  | BES1/BZR1 homolog protein 2                            | 2.51                              |
| <i>BEL1</i>                  | Homeobox protein BEL1 homolog                          | -2.09                             |
| <i>BHLH11</i>                | Transcription factor bHLH11                            | 3.42                              |
| <i>BHLH117</i>               | Transcription factor bHLH117                           | 4.30                              |
| <i>BHLH30</i>                | Transcription factor bHLH30                            | 1.76                              |
| <i>BHLH48</i>                | Transcription factor bHLH48                            | 2.24                              |
| <i>BHLH49</i>                | Transcription factor bHLH49                            | 1.12                              |
| <i>BHLH62</i>                | Transcription factor bHLH62                            | 1.23                              |
| <i>BHLH63</i>                | Transcription factor bHLH63                            | 1.49                              |
| <i>BHLH66</i>                | Transcription factor bHLH66                            | 2.74                              |
| <i>BHLH67</i>                | Transcription factor bHLH67                            | 1.07                              |
| <i>BHLH68</i>                | Transcription factor bHLH68                            | -1.90                             |
| <i>BHLH74</i>                | Transcription factor bHLH74                            | 1.13                              |
| <i>BHLH91</i>                | Transcription factor bHLH91                            | 7.59                              |
| <i>BHLH94</i>                | Transcription factor bHLH94                            | -1.69                             |
| <i>BLH11</i>                 | BEL1-like homeodomain protein 11                       | -1.34                             |
| <i>BLH7</i>                  | BEL1-like homeodomain protein 7                        | -1.10                             |
| <i>BPE</i>                   | Transcription factor BPE                               | 2.71                              |

|                   |                                                   |       |
|-------------------|---------------------------------------------------|-------|
| <i>BTF3</i>       | Transcription factor BTF3                         | 10.25 |
| <i>BZIP02</i>     | Basic leucine zipper 2                            | 2.08  |
| <i>BZIP1</i>      | Basic leucine zipper 1                            | 8.65  |
| <i>BZIP2</i>      | bZIP transcription factor 2                       | 1.58  |
| <i>BZIP25</i>     | Basic leucine zipper 25                           | 5.21  |
| <i>BZIP53</i>     | bZIP transcription factor 53                      | 2.97  |
| <i>BZIP60</i>     | bZIP transcription factor 60                      | 4.24  |
| <i>C1</i>         | Anthocyanin regulatory C1 protein                 | -4.13 |
| <i>CDC5</i>       | Cell division cycle 5-like protein                | 8.91  |
| <i>CDF2</i>       | Cyclic dof factor 2                               | -1.94 |
| <i>CSA</i>        | Transcription factor CSA                          | -1.11 |
| <i>DEFA</i>       | Floral homeotic protein DEFICIENS                 | 2.16  |
| <i>DIVARICATA</i> | Transcription factor DIVARICATA                   | 1.16  |
| <i>DOGL2</i>      | Protein DOG1-like 2                               | 1.77  |
| <i>DOGL3</i>      | Protein DOG1-like 3                               | -1.59 |
| <i>DREB2D</i>     | Dehydration-responsive element-binding protein 2D | -3.81 |
| <i>DREB2E</i>     | Dehydration-responsive element-binding protein 2E | 3.79  |
| <i>DREB2G</i>     | Dehydration-responsive element-binding protein 2G | 1.38  |
| <i>DREB3</i>      | Dehydration-responsive element-binding protein 3  | 2.39  |
| <i>DYT1</i>       | Transcription factor DYT1                         | 8.78  |
| <i>EJ2</i>        | MADS-box protein EJ2                              | 8.23  |
| <i>ERF1A</i>      | Ethylene-responsive transcription factor 1A       | -3.96 |
| <i>FAMA</i>       | Transcription factor FAMA                         | 9.21  |
| <i>FL</i>         | Floricaula/leafy homolog                          | 10.03 |
| <i>FRS3</i>       | Protein FAR1-RELATED SEQUENCE 3                   | -1.51 |
| <i>FRS5</i>       | Protein FAR1-RELATED SEQUENCE 5                   | 1.64  |
| <i>FRS7</i>       | Protein FAR1-RELATED SEQUENCE 7                   | -8.25 |
| <i>FRS8</i>       | Protein FAR1-RELATED SEQUENCE 8                   | 1.69  |
| <i>GATA12</i>     | GATA transcription factor 12                      | 3.44  |
| <i>GATA4</i>      | GATA transcription factor 4                       | 1.78  |
| <i>GATA5</i>      | GATA transcription factor 5                       | 1.34  |
| <i>GATA8</i>      | GATA transcription factor 8                       | 3.63  |
| <i>GATA9</i>      | GATA transcription factor 9                       | 1.84  |
| <i>GEBPL</i>      | GLABROUS1 enhancer-binding protein-like           | 3.75  |
| <i>GL2</i>        | Homeobox-leucine zipper protein GLABRA 2          | -1.39 |
| <i>GT-2</i>       | Trihelix transcription factor GT-2                | -1.16 |
| <i>GT-3B</i>      | Trihelix transcription factor GT-3b               | -3.71 |
| <i>GT-4</i>       | Trihelix transcription factor GT-4                | -1.13 |
| <i>GTE1</i>       | Transcription factor GTE1                         | -1.81 |
| <i>gtf2f2</i>     | General transcription factor IIF subunit 2        | -1.27 |
| <i>HAT14</i>      | Homeobox-leucine zipper protein HAT14             | 1.34  |
| <i>HD1</i>        | Homeobox protein HD1                              | -1.17 |
| <i>HDG12</i>      | Homeobox-leucine zipper protein HDG12             | -1.87 |
| <i>HHO2</i>       | Transcription factor HHO2                         | 8.51  |
| <i>HMGB9</i>      | High mobility group B protein 9                   | 1.70  |
| <i>HOX27</i>      | Homeobox-leucine zipper protein HOX27             | 2.87  |
| <i>HSF24</i>      | Heat shock factor protein HSF24                   | -1.18 |
| <i>HSFB1</i>      | Heat stress transcription factor B-1              | 2.21  |
| <i>HSFB2C</i>     | Heat stress transcription factor B-2c             | -1.02 |
| <i>HSFB4</i>      | Heat stress transcription factor B-4              | -2.21 |
| <i>HSFC1</i>      | Heat stress transcription factor C-1              | 6.15  |

|                              |                                             |       |
|------------------------------|---------------------------------------------|-------|
| <i>IBL1</i>                  | Transcription factor IBH1-like 1            | 1.51  |
| <i>ID3</i>                   | DNA-binding protein inhibitor ID-3          | -9.63 |
| <i>KAN2</i>                  | Probable transcription factor KAN2          | 1.90  |
| <i>KAN4</i>                  | Probable transcription factor KAN4          | 2.51  |
| <i>KN1</i>                   | Homeobox protein knotted-1-like 2           | 1.18  |
| <i>KN1</i>                   | Homeotic protein knotted-1                  | 1.24  |
| <i>KNAT3</i>                 | Homeobox protein knotted-1-like 3           | -1.09 |
| <i>LBD20</i>                 | LOB domain-containing protein 20            | 1.52  |
| <i>LBD29</i>                 | LOB domain-containing protein 29            | 2.08  |
| <i>LBD41</i>                 | LOB domain-containing protein 41            | 3.62  |
| <i>LHW</i>                   | Transcription factor LHW                    | 1.07  |
| <i>LSH10</i>                 | Protein LIGHT-DEPENDENT SHORT HYPOCOTYLS 10 | -4.47 |
| <i>LSH3</i>                  | Protein LIGHT-DEPENDENT SHORT HYPOCOTYLS 3  | 2.20  |
| <i>LSH4</i>                  | Protein LIGHT-DEPENDENT SHORT HYPOCOTYLS 4  | -2.37 |
| <i>MADS3</i>                 | MADS-box transcription factor 3             | 8.36  |
| <i>MADS57</i>                | MADS-box transcription factor 57            | -3.06 |
| <i>MBF1B</i>                 | Multiprotein-bridging factor 1b             | 2.51  |
| <i>MBF1C</i>                 | Multiprotein-bridging factor 1c             | 1.11  |
| <i>MIP1B</i>                 | B-box domain protein 31                     | -1.33 |
| <i>MtrDRAFT_AC149210g4v1</i> | Probable histone H2A.2                      | 2.46  |
| <i>MUTE</i>                  | Transcription factor MUTE                   | -1.79 |
| <i>MYB105</i>                | Transcription factor MYB105                 | 3.12  |
| <i>MYB14</i>                 | Transcription factor MYB14                  | -5.76 |
| <i>MYB17</i>                 | Transcription factor MYB17                  | 2.06  |
| <i>MYB23</i>                 | Transcription factor MYB23                  | -2.90 |
| <i>MYB25</i>                 | Transcription factor MYB25                  | -1.90 |
| <i>MYB306</i>                | Myb-related protein 306                     | 1.18  |
| <i>MYB308</i>                | Myb-related protein 308                     | -2.63 |
| <i>MYB330</i>                | Myb-related protein 330                     | -2.01 |
| <i>MYB35</i>                 | Transcription factor MYB35                  | 7.84  |
| <i>MYB36</i>                 | Transcription factor MYB36                  | -4.45 |
| <i>MYB44</i>                 | Transcription factor MYB44                  | -1.21 |
| <i>MYB46</i>                 | Transcription factor MYB46                  | 1.60  |
| <i>MYB61</i>                 | Transcription factor MYB61                  | 2.56  |
| <i>MYB77</i>                 | Transcription factor MYB77                  | 1.68  |
| <i>MYB8</i>                  | Transcription factor MYB8                   | -2.24 |
| <i>MYBC1</i>                 | Transcription factor MYBC1                  | 1.30  |
| <i>MYR2</i>                  | Myb-related protein 2                       | -1.07 |
| <i>NAC035</i>                | NAC domain-containing protein 35            | 1.26  |
| <i>NAC071</i>                | NAC domain-containing protein 71            | 1.72  |
| <i>NAC072</i>                | NAC domain-containing protein 72            | -4.58 |
| <i>NAC075</i>                | NAC domain-containing protein 75            | 1.62  |
| <i>NAC078</i>                | NAC domain-containing protein 78            | 8.16  |
| <i>NAC083</i>                | NAC domain-containing protein 83            | 3.51  |
| <i>NAC087</i>                | NAC domain-containing protein 87            | -2.50 |
| <i>NAC100</i>                | NAC domain-containing protein 100           | -2.04 |
| <i>NAC104</i>                | NAC domain-containing protein 104           | -9.16 |
| <i>NAC69</i>                 | NAC domain-containing protein 69            | 2.33  |
| <i>NEN4</i>                  | NEN4                                        | -1.33 |
| <i>NFYA8</i>                 | Nuclear transcription factor Y subunit A-8  | 1.83  |

|               |                                                            |       |
|---------------|------------------------------------------------------------|-------|
| <i>NFYB6</i>  | Nuclear transcription factor Y subunit B-6                 | 1.58  |
| <i>NIR1</i>   | Ferredoxin--nitrite reductase, chloroplastic               | -4.52 |
| <i>NLP2</i>   | Protein NLP2                                               | 1.18  |
| <i>NRPB11</i> | DNA-directed RNA polymerases II, IV and V subunit 11       | -3.35 |
| <i>NRPB6A</i> | DNA-directed RNA polymerases II, IV and V subunit 6A       | 3.05  |
| <i>NUCL1</i>  | Nucleolin 1                                                | 4.21  |
| <i>OFP13</i>  | Transcription repressor OFP13                              | 3.29  |
| <i>OFP14</i>  | Transcription repressor OFP14                              | -1.70 |
| <i>OFP16</i>  | Transcription repressor OFP16                              | 1.42  |
| <i>OFP3</i>   | Transcription repressor OFP3                               | 1.09  |
| <i>OFP7</i>   | Transcription repressor OFP7                               | 1.15  |
| <i>OFP8</i>   | Transcription repressor OFP8                               | 8.96  |
| <i>PAN</i>    | Transcription factor PERIANTHIA                            | 1.77  |
| <i>PIF4</i>   | Transcription factor PIF4                                  | -1.98 |
| <i>PMADS2</i> | Floral homeotic protein PMADS 2                            | 13.38 |
| <i>PRE5</i>   | Transcription factor PRE5                                  | 5.11  |
| <i>RAP2-4</i> | Ethylene-responsive transcription factor RAP2-4            | 2.92  |
| <i>RDR1</i>   | RNA-dependent RNA polymerase 1                             | 1.09  |
| <i>RDR2</i>   | RNA-dependent RNA polymerase 2                             | 1.60  |
| <i>SAP</i>    | Transcriptional regulator STERILE APETALA                  | -2.65 |
| <i>SCL18</i>  | Scarecrow-like protein 18                                  | 8.61  |
| <i>SCL3</i>   | Scarecrow-like protein 3                                   | -2.25 |
| <i>SCL5</i>   | Scarecrow-like protein 5                                   | 4.16  |
| <i>SCRM</i>   | Transcription factor ICE1                                  | 2.15  |
| <i>SHI</i>    | Protein SHORT INTERNODES                                   | 4.51  |
| <i>SHR</i>    | Protein SHORT-ROOT                                         | 2.47  |
| <i>SIR</i>    | Assimilatory sulfite reductase (ferredoxin), chloroplastic | 2.15  |
| <i>SIR1</i>   | Sulfite reductase 1 [ferredoxin], chloroplastic            | -1.00 |
| <i>SPL6</i>   | Squamosa promoter-binding-like protein 6                   | -1.24 |
| <i>SPL9</i>   | Squamosa promoter-binding-like protein 9                   | -1.92 |
| <i>STOP1</i>  | Protein SENSITIVE TO PROTON RHIZOTOXICITY 1                | 1.77  |
| <i>TAF10</i>  | Transcription initiation factor TFIID subunit 10           | 4.47  |
| <i>TAGLN3</i> | Transgelin-3                                               | 8.69  |
| <i>TCP15</i>  | Transcription factor TCP15                                 | 1.29  |
| <i>TCP20</i>  | Transcription factor TCP20                                 | 3.21  |
| <i>TCP4</i>   | Transcription factor TCP4                                  | 2.66  |
| <i>TCX2</i>   | tesmin/TSO1-like CXC 2                                     | 1.08  |
| <i>TFIIB1</i> | Transcription initiation factor IIB-1                      | 5.71  |
| <i>TGA10</i>  | bZIP transcription factor TGA10                            | 7.03  |
| <i>TPR4</i>   | Topless-related protein 4                                  | 11.93 |
| <i>TRY</i>    | Transcription factor TRY                                   | -1.35 |
| <i>TULP1</i>  | Tubby-like F-box protein 1                                 | 1.26  |
| <i>WIN1</i>   | Ethylene-responsive transcription factor WIN1              | -2.32 |
| <i>WRKY11</i> | Probable WRKY transcription factor 11                      | 3.69  |
| <i>WRKY12</i> | Probable WRKY transcription factor 12                      | -2.93 |
| <i>WRKY24</i> | WRKY transcription factor WRKY24                           | -2.56 |
| <i>WRKY48</i> | Probable WRKY transcription factor 48                      | -2.76 |
| <i>WRKY6</i>  | WRKY transcription factor 6                                | 2.72  |
| <i>WRKY65</i> | Probable WRKY transcription factor 65                      | -2.50 |
| <i>WRKY75</i> | Probable WRKY transcription factor 75                      | 9.10  |

#### **Zinc finger protein**



|                     |                                                                       |        |
|---------------------|-----------------------------------------------------------------------|--------|
| <i>At1g19860</i>    | Zinc finger CCCH domain-containing protein 6                          | -1.09  |
| <i>At1g66810</i>    | Zinc finger CCCH domain-containing protein 14                         | -1.04  |
| <i>At1g68200</i>    | Zinc finger CCCH domain-containing protein 15                         | 1.28   |
| <i>At2g19810</i>    | Zinc finger CCCH domain-containing protein 20                         | 4.03   |
| <i>At2g20280</i>    | Zinc finger CCCH domain-containing protein 21                         | -1.62  |
| <i>At2g25900</i>    | Zinc finger CCCH domain-containing protein 23                         | 1.58   |
| <i>At2g40140</i>    | Zinc finger CCCH domain-containing protein 29                         | -1.58  |
| <i>AZF1</i>         | Zinc finger protein AZF1                                              | -1.66  |
| <i>COL2</i>         | Zinc finger protein CONSTANS-LIKE 2                                   | 3.24   |
| <i>DOF3.5</i>       | Dof zinc finger protein DOF3.5                                        | 2.97   |
| <i>DOF3.6</i>       | Dof zinc finger protein DOF3.6                                        | 1.75   |
| <i>DOF5.4</i>       | Dof zinc finger protein DOF5.4                                        | 1.08   |
| <i>DOF5.7</i>       | Dof zinc finger protein DOF5.7                                        | 3.18   |
| <i>HAT</i>          | Zinc finger BED domain-containing protein DAYSLEEPER                  | 7.47   |
| <i>JAG</i>          | Zinc finger protein JAGGED                                            | 11.05  |
| <i>KNU</i>          | Zinc finger protein KNUCKLES                                          | 10.30  |
| <i>MGP</i>          | Zinc finger protein MAGPIE                                            | 2.84   |
| <i>Os01g0518400</i> | Zinc finger BED domain-containing protein RICESLEEPER 4               | -4.86  |
| <i>Os03g0733400</i> | Zinc finger BED domain-containing protein RICESLEEPER 2               | -10.07 |
| <i>Os05g0239150</i> | Zinc finger BED domain-containing protein RICESLEEPER 1               | -5.40  |
| <i>Os05g0583200</i> | Zinc finger BED domain-containing protein RICESLEEPER 3               | -6.09  |
| <i>Os07g0682400</i> | Zinc finger CCCH domain-containing protein 53                         | 1.75   |
| <i>Os10g0391300</i> | Zinc finger CCCH domain-containing protein 62                         | 2.35   |
| <i>SAP12</i>        | Zinc finger AN1 domain-containing stress-associated protein 12        | 3.08   |
| <i>SAP2</i>         | Zinc finger A20 and AN1 domain-containing stress-associated protein 2 | 3.24   |
| <i>SAP4</i>         | Zinc finger A20 and AN1 domain-containing stress-associated protein 4 | 3.29   |
| <i>SAP5</i>         | Zinc finger A20 and AN1 domain-containing stress-associated protein 5 | 4.12   |
| <i>SAP7</i>         | Zinc finger A20 and AN1 domain-containing stress-associated protein 7 | 2.29   |
| <i>WIP2</i>         | Zinc finger protein WIP2                                              | 10.96  |
| <i>WIP4</i>         | Zinc finger protein WIP4                                              | 8.26   |
| <i>ZAT12</i>        | Zinc finger protein ZAT12                                             | 4.37   |
| <i>ZAT3</i>         | Zinc finger protein ZAT3                                              | -9.35  |
| <i>ZAT5</i>         | Zinc finger protein ZAT5                                              | -1.95  |
| <i>ZAT6</i>         | Zinc finger protein ZAT6                                              | 3.67   |
| <i>ZAT9</i>         | Zinc finger protein ZAT9                                              | 1.54   |
| <i>ZFP1</i>         | Zinc finger protein 1                                                 | -1.04  |
| <i>ZFP10</i>        | Zinc finger protein 10                                                | 9.95   |
| <i>ZFP3</i>         | Zinc finger protein 3                                                 | -1.11  |
| <i>ZHD1</i>         | Zinc-finger homeodomain protein 1                                     | 5.73   |
| <i>ZHD4</i>         | Zinc-finger homeodomain protein 4                                     | 7.49   |
| <i>ZHD8</i>         | Zinc-finger homeodomain protein 8                                     | 1.28   |
| <i>ZMYM1</i>        | Zinc finger MYM-type protein 1                                        | -1.43  |
| <i>ZNHIT3</i>       | Zinc finger HIT domain-containing protein 3                           | 2.51   |

**Reverse transcription**

|                  |                                                                               |       |
|------------------|-------------------------------------------------------------------------------|-------|
| N/A              | DNA polymerase                                                                | -1.05 |
| N/A              | Retrovirus-related Pol polyprotein from transposon TNT 1-94                   | 12.95 |
| N/A              | Retrovirus-related Pol polyprotein from type-1 retrotransposable element R2   | -3.47 |
| N/A              | Retrovirus-related Pol polyprotein from type-1 retrotransposable element R2   | 13.47 |
| N/A              | Retrovirus-related Pol polyprotein from type-1 retrotransposable element R2   | 10.44 |
| N/A              | RNA-directed RNA polymerase                                                   | -1.31 |
| <i>At4g24790</i> | STICHEL-like 2                                                                | 1.03  |
| <i>pol</i>       | Retrovirus-related Pol polyprotein from transposon 17.6                       | 11.05 |
| <i>pol</i>       | Retrovirus-related Pol polyprotein from transposon 297                        | 1.91  |
| <i>POL</i>       | Retrovirus-related Pol polyprotein from transposon 412                        | 8.02  |
| <i>pol</i>       | Retrovirus-related Pol polyprotein from transposon gypsy                      | -6.21 |
| <i>pol</i>       | Retrovirus-related Pol polyprotein from transposon opus                       | 3.73  |
| <i>pol</i>       | Retrovirus-related Pol polyprotein from type-2 retrotransposable element R2DM | -3.40 |
| <i>POLL</i>      | DNA polymerase lambda                                                         | 1.36  |
| <i>RE1</i>       | Retrovirus-related Pol polyprotein from transposon RE1                        | -9.55 |
| <i>RE2</i>       | Retrovirus-related Pol polyprotein from transposon RE2                        | -9.60 |
| <i>TY3B-I</i>    | RNA-directed DNA polymerase homolog                                           | -9.25 |

**Others**

|                  |                                                                           |       |
|------------------|---------------------------------------------------------------------------|-------|
| <i>AGO1B</i>     | Protein argonaute 1B                                                      | 3.18  |
| <i>alkB</i>      | Alpha-ketoglutarate-dependent dioxygenase AlkB                            | -1.00 |
| <i>ASI1</i>      | Protein ANTI-SILENCING 1                                                  | 1.13  |
| <i>At1g07790</i> | Histone H2B.1                                                             | 1.68  |
| <i>At1g09620</i> | Leucine--tRNA ligase, cytoplasmic                                         | -2.34 |
| <i>At1g52740</i> | Probable histone H2A variant 3                                            | 2.53  |
| <i>At1g65660</i> | Pre-mRNA-splicing factor SLU7-A                                           | 2.60  |
| <i>At2g28720</i> | Histone H2B.3                                                             | 2.31  |
| <i>At2g30620</i> | Histone H1                                                                | 1.38  |
| <i>At3g19184</i> | B3 domain-containing protein At3g19184                                    | 1.41  |
| <i>At3g58590</i> | Pentatricopeptide repeat-containing protein At3g58590                     | 1.42  |
| <i>At4g34730</i> | Probable ribosome-binding factor A, chloroplastic                         | 11.52 |
| <i>At5g02560</i> | Histone H2A                                                               | 1.16  |
| <i>ATXR6</i>     | Histone-lysine N-methyltransferase ATXR6                                  | 1.26  |
| <i>BARD1</i>     | BRCA1-associated RING domain protein 1                                    | 10.47 |
| <i>c12.1</i>     | Protein CWC15 homolog                                                     | 2.33  |
| <i>CAD</i>       | Probable mannitol dehydrogenase                                           | 1.69  |
| <i>cdc45</i>     | Cell division control protein 45 homolog                                  | 1.52  |
| <i>CDC6</i>      | Cell division control protein 6 homolog                                   | 1.10  |
| <i>CDT1A</i>     | CDT1-like protein a, chloroplastic                                        | 1.48  |
| <i>CID11</i>     | Polyadenylate-binding protein-interacting protein 11                      | -1.23 |
| <i>cirbp-b</i>   | Cold-inducible RNA-binding protein B                                      | 9.70  |
| <i>CMT3</i>      | DNA (cytosine-5)-methyltransferase CMT3                                   | 1.35  |
| <i>CP29B</i>     | RNA-binding protein CP29B, chloroplastic                                  | 2.65  |
| <i>crop</i>      | Luc7-like protein                                                         | -1.13 |
| <i>CRS2A</i>     | Chloroplastic group IIB intron splicing facilitator CRS2-A, chloroplastic | 1.00  |
| <i>CSN2</i>      | COP9 signalosome complex subunit 2                                        | 9.39  |

|                 |                                                                  |       |
|-----------------|------------------------------------------------------------------|-------|
| <i>cowf17</i>   | Pre-mRNA-splicing factor cowf17                                  | 8.51  |
| <i>CXIP4</i>    | CAX-interacting protein 4                                        | 9.50  |
| <i>DDM1</i>     | ATP-dependent DNA helicase DDM1                                  | 6.67  |
| <i>DDX21</i>    | Nucleolar RNA helicase 2                                         | 9.81  |
| <i>Ddx50</i>    | ATP-dependent RNA helicase DDX50                                 | 9.17  |
| <i>DMC1</i>     | Meiotic recombination protein DMC1 homolog                       | 2.13  |
| <i>DMT1</i>     | DNA (cytosine-5)-methyltransferase 1                             | 1.27  |
| <i>DnaJ-1</i>   | DnaJ protein homolog 1                                           | 5.29  |
| <i>dpb4</i>     | DNA polymerase epsilon subunit D                                 | 1.05  |
| <i>dtl-a</i>    | Denticleless protein homolog A                                   | 1.62  |
| <i>EBP2</i>     | Probable rRNA-processing protein EBP2 homolog                    | 1.21  |
| <i>EEF1D</i>    | Elongation factor 1-delta                                        | 9.76  |
| <i>EEF2</i>     | Elongation factor 2                                              | -8.48 |
| <i>EMB2758</i>  | Pentatricopeptide repeat-containing protein At4g33990            | 1.30  |
| <i>eri2</i>     | ERI1 exoribonuclease 2                                           | 1.62  |
| <i>EXO1</i>     | Exonuclease 1                                                    | 1.35  |
| <i>F46B6.12</i> | UPF0587 protein F46B6.12                                         | -4.53 |
| <i>Gins1</i>    | DNA replication complex GINS protein PSF1                        | 1.07  |
| <i>GIP</i>      | Copia protein                                                    | 10.24 |
| <i>GLO</i>      | Floral homeotic protein GLOBOSA                                  | 13.36 |
| <i>GRF3</i>     | Growth-regulating factor 3                                       | 2.37  |
| <i>GRF4</i>     | Growth-regulating factor 4                                       | 5.22  |
| <i>GRP10</i>    | Glycine-rich RNA-binding protein 10                              | 3.23  |
| <i>GRXS13</i>   | Monothiol glutaredoxin-S13                                       | 4.43  |
| <i>H3-1.1</i>   | Histone H3.2                                                     | 1.96  |
| <i>H3-7</i>     | Histone H3.2                                                     | 2.98  |
| <i>HAC12</i>    | Histone acetyltransferase HAC12                                  | 1.59  |
| <i>HDT2</i>     | Histone deacetylase HDT2                                         | 2.98  |
| <i>HHT1</i>     | Histone H3.1                                                     | 2.53  |
| <i>HIPP41</i>   | Heavy metal-associated isoprenylated plant protein 41            | 1.09  |
| <i>HIS2A</i>    | Histone H2AX                                                     | 1.86  |
| <i>hmces</i>    | Abasic site processing protein HMCES                             | 2.31  |
| <i>HMGB2</i>    | HMG1/2-like protein                                              | 1.54  |
| <i>HMGB2</i>    | HMG1/2-like protein                                              | 3.75  |
| <i>HMGIY2</i>   | HMG-Y-related protein A                                          | 1.45  |
| <i>K02A2.6</i>  | Uncharacterized protein K02A2.6                                  | -1.53 |
| <i>KU70</i>     | ATP-dependent DNA helicase 2 subunit KU70                        | -1.49 |
| <i>L</i>        | RNA-directed RNA polymerase L                                    | -8.80 |
| <i>LARP6A</i>   | La-related protein 6A                                            | 8.74  |
| <i>MAGO</i>     | mago nashi homolog                                               | 2.11  |
| <i>MCM3</i>     | DNA replication licensing factor MCM3                            | 1.77  |
| <i>MCM5</i>     | DNA replication licensing factor MCM5                            | 1.01  |
| <i>MCM9</i>     | Probable DNA helicase MCM9                                       | 1.59  |
| <i>MED37C</i>   | Probable mediator of RNA polymerase II transcription subunit 37c | 5.15  |
| <i>MED6</i>     | Mediator of RNA polymerase II transcription subunit 6            | -1.34 |
| <i>NAC081</i>   | Protein ATAF2                                                    | 9.24  |
| <i>ORC1</i>     | Origin of replication complex subunit 1                          | 2.34  |
| <i>ORC4</i>     | Origin of replication complex subunit 4                          | 1.23  |
| <i>ORC6</i>     | Origin of replication complex subunit 6                          | 1.37  |
| <i>ORTH2</i>    | E3 ubiquitin-protein ligase ORTHRUS 2                            | 1.79  |

|                     |                                                                      |        |
|---------------------|----------------------------------------------------------------------|--------|
| <i>Os03g0120900</i> | B3 domain-containing protein Os03g0120900                            | 1.95   |
| <i>Os05g0235800</i> | DNA replication licensing factor MCM6                                | 1.36   |
| <i>Os07g0679700</i> | B3 domain-containing protein Os07g0679700                            | -2.33  |
| <i>Os12g0591300</i> | B3 domain-containing protein Os12g0591400                            | -2.03  |
| <i>OsI_36121</i>    | DNA replication licensing factor MCM2                                | 1.50   |
| <i>Pabpc1</i>       | Polyadenylate-binding protein 1                                      | 10.61  |
| <i>PCMP-A5</i>      | Pentatricopeptide repeat-containing protein At3g26540                | 1.38   |
| <i>PCMP-E1</i>      | Pentatricopeptide repeat-containing protein At5g59600                | 1.28   |
| <i>PCMP-E4</i>      | Pentatricopeptide repeat-containing protein At1g03540                | 1.35   |
| <i>PCMP-E6</i>      | Pentatricopeptide repeat-containing protein At4g22760                | -1.06  |
| <i>PCMP-E88</i>     | Pentatricopeptide repeat-containing protein At3g09040, mitochondrial | 1.24   |
| <i>PCMP-E99</i>     | Pentatricopeptide repeat-containing protein At4g04370                | 1.64   |
| <i>PCMP-H12</i>     | Pentatricopeptide repeat-containing protein At1g08070, chloroplastic | 1.15   |
| <i>PCMP-H53</i>     | Pentatricopeptide repeat-containing protein At4g33170                | 1.09   |
| <i>PCMP-H70</i>     | Pentatricopeptide repeat-containing protein At1g71420                | 1.58   |
| <i>PCMP-H81</i>     | Pentatricopeptide repeat-containing protein At3g57430, chloroplastic | 1.15   |
| <i>PCNA</i>         | Proliferating cell nuclear antigen                                   | 1.35   |
| <i>PDCD4</i>        | Programmed cell death protein 4                                      | 8.93   |
| <i>PHN1</i>         | Protein argonaute PNH1                                               | 2.22   |
| <i>pif1</i>         | ATP-dependent DNA helicase pif1                                      | -1.06  |
| <i>PIF1</i>         | ATP-dependent DNA helicase PIF1                                      | -1.16  |
| <i>pif1</i>         | ATP-dependent DNA helicase pif1                                      | 2.99   |
| <i>pif1</i>         | ATP-dependent DNA helicase pif1                                      | -1.14  |
| <i>PIF4</i>         | ATP-dependent DNA helicase PIF4                                      | -1.03  |
| <i>PIF7</i>         | ATP-dependent DNA helicase PIF7                                      | -1.15  |
| <i>PLA2</i>         | Protein terminal ear1 homolog                                        | 7.83   |
| <i>pol</i>          | Gag-Pol polyprotein                                                  | 12.69  |
| <i>Pol</i>          | LINE-1 retrotransposable element ORF2 protein                        | -7.70  |
| <i>Ppie</i>         | Peptidyl-prolyl cis-trans isomerase E                                | 1.51   |
| <i>R3hdm2</i>       | R3H domain-containing protein 2                                      | 4.37   |
| <i>RAD23D</i>       | Ubiquitin receptor RAD23d                                            | 4.11   |
| <i>RAD51</i>        | DNA repair protein RAD51 homolog                                     | 1.24   |
| <i>RAD5B</i>        | DNA repair protein RAD5B                                             | 1.49   |
| <i>RBG2</i>         | Glycine-rich RNA-binding protein 2, mitochondrial                    | 3.55   |
| <i>RBG5</i>         | Glycine-rich RNA-binding protein 5, mitochondrial                    | 3.17   |
| <i>RBG7</i>         | Glycine-rich RNA-binding protein GRP1A                               | 3.14   |
| <i>RBP1</i>         | RNA-binding protein 1                                                | 4.60   |
| <i>RBP45A</i>       | Polyadenylate-binding protein RBP45A                                 | 2.64   |
| <i>RBP45C</i>       | Polyadenylate-binding protein RBP45C                                 | 4.12   |
| <i>RBP47B</i>       | Polyadenylate-binding protein RBP47B                                 | 4.58   |
| <i>RCOM_1506700</i> | Probable aspartyl aminopeptidase                                     | 1.47   |
| <i>RECQSIM</i>      | ATP-dependent DNA helicase Q-like SIM                                | 1.03   |
| <i>RH14</i>         | DEAD-box ATP-dependent RNA helicase 14                               | 3.49   |
| <i>RH3</i>          | Histone H3.3                                                         | 2.41   |
| <i>RH31</i>         | DEAD-box ATP-dependent RNA helicase 31                               | 1.04   |
| <i>RNA1</i>         | RNA1 polyprotein                                                     | -14.32 |
| <i>RNA1</i>         | RNA1 polyprotein                                                     | -14.85 |
| <i>rnf2-a</i>       | E3 ubiquitin-protein ligase RING2-A                                  | -1.04  |

|                |                                                       |        |
|----------------|-------------------------------------------------------|--------|
| <i>rnhA</i>    | Ribonuclease HI                                       | 4.81   |
| <i>ROC3</i>    | Homeobox-leucine zipper protein ROC3                  | 1.54   |
| <i>RPA1B</i>   | Replication protein A 70 kDa DNA-binding subunit B    | 1.58   |
| <i>RPT6A</i>   | 26S proteasome regulatory subunit 8 homolog A         | -2.34  |
| <i>RS2</i>     | Protein rough sheath 2                                | 1.66   |
| <i>RS2Z33</i>  | Serine/arginine-rich splicing factor RS2Z33           | 2.60   |
| <i>RS40</i>    | Serine/arginine-rich splicing factor RS40             | 8.48   |
| <i>Rtfdc1</i>  | Replication termination factor 2                      | 3.01   |
| <i>RZFP34</i>  | Probable E3 ubiquitin-protein ligase RZFP34           | 3.76   |
| <i>RZPF34</i>  | E3 ubiquitin-protein ligase RZFP34                    | 2.72   |
| <i>S100a1</i>  | Protein S100-A1                                       | 11.53  |
| <i>SCL30A</i>  | Serine/arginine-rich SC35-like splicing factor SCL30A | 3.82   |
| <i>SCL7</i>    | SCARECROW-LIKE protein 7                              | 1.51   |
| <i>sde2</i>    | Replication stress response regulator SDE2            | 2.28   |
| <i>SKI2</i>    | DEXH-box ATP-dependent RNA helicase DEXH11            | 1.03   |
| <i>SKIP</i>    | SNW/SKI-interacting protein                           | 8.67   |
| <i>SIH4</i>    | Histone H4                                            | 3.18   |
| <i>SIH4</i>    | Histone H4                                            | 2.26   |
| <i>Slx1b</i>   | Structure-specific endonuclease subunit SLX1          | 1.64   |
| <i>SNRNP40</i> | U5 small nuclear ribonucleoprotein 40 kDa protein     | 8.69   |
| <i>snu13</i>   | NHP2-like protein 1                                   | 2.22   |
| <i>soH3-1</i>  | Histone H3.3b                                         | -1.69  |
| <i>SPO11-1</i> | Meiotic recombination protein SPO11-1                 | -3.15  |
| <i>SR45A</i>   | Serine/arginine-rich splicing factor SR45a            | 8.75   |
| <i>SRP72</i>   | Signal recognition particle subunit SRP72             | -1.32  |
| <i>STI</i>     | Protein STICHEL                                       | 1.40   |
| <i>TE1</i>     | Protein terminal ear1                                 | 5.60   |
| <i>Tf2-12</i>  | Transposon Tf2-12 polyprotein                         | -8.51  |
| <i>Tnni2</i>   | Troponin I, fast skeletal muscle                      | -10.64 |
| <i>TOP2</i>    | DNA topoisomerase 2                                   | 2.33   |
| <i>TPR1</i>    | Protein TPR1                                          | -1.39  |
| <i>TY2B-B</i>  | Transposon Ty2-B Gag-Pol polyprotein                  | 2.43   |
| <i>TY3B-G</i>  | Transposon Ty3-G Gag-Pol polyprotein                  | 6.38   |
| <i>TY3B-I</i>  | Transposon Ty3-I Gag-Pol polyprotein                  | 9.48   |
| <i>TY4B-J</i>  | Transposon Ty4-J Gag-Pol polyprotein                  | -1.35  |
| <i>U2AF35B</i> | Splicing factor U2af small subunit B                  | 9.02   |
| <i>UBA1C</i>   | UBP1-associated proteins 1C                           | 1.02   |
| <i>UBP1A</i>   | Oligouridylate-binding protein 1A                     | 2.40   |
| <i>UVH3</i>    | DNA repair protein UVH3                               | -1.36  |
| <i>VIM</i>     | Vimentin                                              | -9.63  |
| <i>Wrrn</i>    | Werner syndrome ATP-dependent helicase homolog        | 2.07   |
| <i>XRCC2</i>   | DNA repair protein XRCC2 homolog                      | 1.41   |
| <i>YBX1</i>    | Y-box-binding protein 1                               | 11.39  |
| <i>ythdf2</i>  | YTH domain-containing family protein 2                | 3.60   |

---

**Table S5.** Cell morphogenesis genes differentially expressed in CR and CS.

| Gene name                          | Protein name                                                         | log <sub>2</sub> Ratio<br>(CR/CS) |
|------------------------------------|----------------------------------------------------------------------|-----------------------------------|
| <b>Cell growth and development</b> |                                                                      |                                   |
| <i>3MMP</i>                        | Metalloendoproteinase 3-MMP                                          | -2.09                             |
| <i>ACC1</i>                        | Acetyl-CoA carboxylase 1                                             | -1.47                             |
| <i>ADF5</i>                        | Actin-depolymerizing factor 5                                        | 2.11                              |
| <i>AHL24</i>                       | AT-hook motif nuclear-localized protein 24                           | -5.53                             |
| <i>AIR3</i>                        | Subtilisin-like protease SBT5.3                                      | -5.84                             |
| <i>AMP1</i>                        | Probable glutamate carboxypeptidase AMP1                             | -1.30                             |
| <i>ANXA2</i>                       | Annexin A2                                                           | -8.83                             |
| <i>AS2</i>                         | ASYMMETRIC LEAVES 2                                                  | 10.19                             |
| <i>asp</i>                         | Protein abnormal spindle                                             | 1.32                              |
| <i>At1g06760</i>                   | Histone H1                                                           | 1.42                              |
| <i>At1g51060</i>                   | Probable histone H2A.1                                               | 1.90                              |
| <i>At1g64390</i>                   | Endoglucanase 6                                                      | -2.65                             |
| <i>At1g67360</i>                   | REF/SRPP-like protein At1g67360                                      | 9.30                              |
| <i>At1g80180</i>                   | MAPK kinase substrate protein At1g80180                              | -1.30                             |
| <i>At2g32990</i>                   | Endoglucanase 11                                                     | 1.70                              |
| <i>At3g01270</i>                   | Probable pectate lyase 7                                             | 1.35                              |
| <i>At3g05500</i>                   | REF/SRPP-like protein At3g05500                                      | 4.84                              |
| <i>At3g07010</i>                   | Probable pectate lyase 8                                             | 5.25                              |
| <i>At3g53190</i>                   | Probable pectate lyase 12                                            | 1.80                              |
| <i>At4g02290</i>                   | Endoglucanase 17                                                     | 5.02                              |
| <i>At4g39010</i>                   | Endoglucanase 24                                                     | -1.36                             |
| <i>At5g13200</i>                   | GEM-like protein 5                                                   | 3.70                              |
| <i>At5g27670</i>                   | Probable histone H2A.5                                               | 2.59                              |
| <i>At5g39980</i>                   | Pentatricopeptide repeat-containing protein At5g39980, chloroplastic | 1.10                              |
| <i>At5g59910</i>                   | Histone H2B.11                                                       | 1.83                              |
| <i>At5g45780</i>                   | Probable LRR receptor-like serine/threonine-protein kinase At5g45780 | 1.49                              |
| <i>At5g63180</i>                   | Probable pectate lyase 22                                            | -1.50                             |
| <i>ATHB-13</i>                     | Homeobox-leucine zipper protein ATHB-13                              | -1.31                             |
| <i>AUR3</i>                        | Serine/threonine-protein kinase Aurora-3                             | 2.03                              |
| <i>BPS1</i>                        | Protein BPS1, chloroplastic                                          | 7.90                              |
| <i>BTU1</i>                        | Tubulin beta chain                                                   | 3.37                              |
| <i>BUBR1</i>                       | Mitotic spindle checkpoint protein BUBR1                             | 1.25                              |
| <i>CAP1</i>                        | Cyclase-associated protein 1                                         | 1.01                              |
| <i>CEL1</i>                        | Endoglucanase 8                                                      | 3.29                              |
| <i>CFL1</i>                        | Cofilin-1                                                            | -10.22                            |
| <i>Cfl2</i>                        | Cofilin-2                                                            | 10.07                             |
| <i>CHR10</i>                       | Probable helicase CHR10                                              | -9.18                             |
| <i>CHUP1</i>                       | Protein CHUP1, chloroplastic                                         | -4.05                             |
| <i>CLASP</i>                       | CLIP-associated protein                                              | -1.43                             |
| <i>CLPC1</i>                       | Chaperone protein ClpC1, chloroplastic                               | 3.04                              |
| <i>COBL4</i>                       | COBRA-like protein 4                                                 | 1.25                              |
| <i>COL1A1</i>                      | Collagen alpha-1(I) chain                                            | 10.51                             |
| <i>COL1A1</i>                      | Collagen alpha-1(I) chain                                            | -8.32                             |
| <i>col1a2</i>                      | Collagen alpha-2(I) chain                                            | 10.06                             |
| <i>COL3A1</i>                      | Collagen alpha-1(III) chain                                          | -8.52                             |

|               |                                                             |       |
|---------------|-------------------------------------------------------------|-------|
| <i>COL5A2</i> | Collagen alpha-2(V) chain                                   | -9.54 |
| <i>CR4</i>    | Serine/threonine-protein kinase-like protein CR4            | 2.31  |
| <i>CSLD4</i>  | Cellulose synthase-like protein D4                          | 2.13  |
| <i>CSLD5</i>  | Cellulose synthase-like protein D5                          | 1.56  |
| <i>CSLG3</i>  | Cellulose synthase-like protein G3                          | 2.70  |
| <i>CSLH1</i>  | Cellulose synthase-like protein H1                          | -5.57 |
| <i>DCR</i>    | BAHD acyltransferase DCR                                    | 3.04  |
| <i>DGD2</i>   | Digalactosyldiacylglycerol synthase 2, chloroplastic        | -1.82 |
| <i>DL</i>     | Protein DROOPING LEAF                                       | 5.58  |
| <i>DMP3</i>   | Protein DMP3                                                | -2.21 |
| <i>DMP9</i>   | Protein DMP9                                                | 4.94  |
| <i>DRMH1</i>  | Dormancy-associated protein homolog 1                       | 5.77  |
| <i>DRP5A</i>  | Dynamin-related protein 5A                                  | 1.42  |
| <i>DUF1</i>   | DUF724 domain-containing protein 1                          | 1.15  |
| <i>DYAD</i>   | Protein DYAD                                                | 7.13  |
| <i>DYNLL1</i> | Dynein light chain LC6, flagellar outer arm                 | 1.40  |
| <i>EFEMP2</i> | EGF-containing fibulin-like extracellular matrix protein 2  | 11.23 |
| <i>ERL2</i>   | LRR receptor-like serine/threonine-protein kinase ERL2      | 3.69  |
| <i>EXLB1</i>  | Expansin-like B1                                            | 8.86  |
| <i>EXPA11</i> | Expansin-A11                                                | 3.74  |
| <i>EXPA4</i>  | Expansin-A4                                                 | 1.70  |
| <i>EXPA6</i>  | Expansin-A6                                                 | -1.10 |
| <i>EXPA8</i>  | Expansin-A8                                                 | -2.05 |
| <i>EXT3</i>   | Extensin-3                                                  | -3.77 |
| <i>faeA</i>   | Feruloyl esterase A                                         | -6.50 |
| <i>FEI1</i>   | LRR receptor-like serine/threonine-protein kinase FEI 1     | 1.39  |
| <i>FLA1</i>   | Fasciclin-like arabinogalactan protein 1                    | -1.22 |
| <i>FLNA</i>   | Filamin-A                                                   | -9.90 |
| <i>FLNB</i>   | Filamin-B                                                   | 8.85  |
| <i>FN1</i>    | Fibronectin                                                 | -8.35 |
| <i>FTIP1</i>  | FT-interacting protein 1                                    | 1.27  |
| <i>GALS1</i>  | Galactan beta-1,4-galactosyltransferase GALS1               | 2.10  |
| <i>GATA15</i> | GATA transcription factor 15                                | 3.24  |
| <i>GATA18</i> | GATA transcription factor 18                                | 1.77  |
| <i>GLOX1</i>  | Aldehyde oxidase GLOX1                                      | -2.41 |
| <i>GMGT1</i>  | Galactomannan galactosyltransferase 1                       | 1.66  |
| <i>GPX4</i>   | Phospholipid hydroperoxide glutathione peroxidase           | 9.82  |
| <i>GSN</i>    | Gelsolin                                                    | 9.00  |
| <i>Gsn</i>    | Gelsolin                                                    | -9.24 |
| <i>H2B.6</i>  | Histone H2B.6                                               | 3.33  |
| <i>HDG11</i>  | Homeobox-leucine zipper protein HDG11                       | 2.53  |
| <i>HIS2B</i>  | Histone H2B                                                 | 1.85  |
| <i>HMGB7</i>  | High mobility group B protein 7                             | 1.53  |
| <i>HSL2</i>   | LRR receptor-like serine/threonine-protein kinase HSL2      | 2.46  |
| <i>IDD14</i>  | Protein indeterminate-domain 14                             | 1.21  |
| <i>ISE2</i>   | DExH-box ATP-dependent RNA helicase DExH15<br>chloroplastic | -2.19 |
| <i>Itgb1</i>  | Integrin beta-1                                             | -8.57 |
| <i>JGB</i>    | Protein JINGUBANG                                           | 5.43  |
| <i>KIN1</i>   | Kinesin-like protein KIN-1                                  | 3.51  |
| <i>KIN10A</i> | Kinesin-like protein KIN-10A                                | 1.59  |

|                     |                                                          |        |
|---------------------|----------------------------------------------------------|--------|
| <i>KIN10B</i>       | Kinesin-like protein KIN-10B                             | 2.26   |
| <i>KIN10C</i>       | Kinesin-like protein KIN-10C                             | 1.17   |
| <i>KIN12D</i>       | Kinesin-like protein KIN-12D                             | 1.35   |
| <i>KIN12E</i>       | Kinesin-like protein KIN-12E                             | 1.74   |
| <i>KIN12F</i>       | Kinesin-like protein KIN-12F                             | 1.21   |
| <i>KIN12F</i>       | Kinesin-like protein KIN-12F                             | 2.68   |
| <i>KIN14D</i>       | Kinesin-like protein KIN-14D                             | 1.03   |
| <i>KIN14K</i>       | Kinesin-like protein KIN-14K                             | -1.49  |
| <i>KIN14L</i>       | Kinesin-like protein KIN-14L                             | 1.96   |
| <i>KIN14P</i>       | Kinesin-like protein KIN-14P                             | -1.66  |
| <i>KIN14R</i>       | Kinesin-like protein KIN-14R                             | 1.24   |
| <i>KIN14S</i>       | Kinesin-like protein KIN-14S                             | 1.77   |
| <i>KIN4A</i>        | Kinesin-like protein KIN-4A                              | 1.02   |
| <i>KIN5D</i>        | Kinesin-like protein KIN-5D                              | 1.35   |
| <i>KIN7D</i>        | Kinesin-like protein KIN-7D, mitochondrial               | 1.02   |
| <i>KIN7N</i>        | Kinesin-like protein KIN-7N                              | 1.59   |
| <i>KIN8A</i>        | Kinesin-like protein KIN-8A                              | 1.25   |
| <i>krt18</i>        | Keratin, type I cytoskeletal 18                          | 10.63  |
| <i>LBD27</i>        | LOB domain-containing protein 27                         | 1.71   |
| <i>LCV2</i>         | Protein LIKE COV 2                                       | -1.35  |
| <i>LNG2</i>         | Protein LONGIFOLIA 2                                     | 3.64   |
| <i>LOX4</i>         | Lipoxygenase 4, chloroplastic                            | -3.99  |
| <i>MAIL1</i>        | Protein MAIN-LIKE 1                                      | 1.89   |
| <i>MAP65-3</i>      | 65-kDa microtubule-associated protein 3                  | 1.20   |
| <i>MIF2</i>         | Mini zinc finger protein 2                               | -8.44  |
| <i>MMD1</i>         | PHD finger protein MALE MEIOCYTE DEATH 1                 | -1.01  |
| <i>MMP2</i>         | 72 kDa type IV collagenase                               | 9.54   |
| <i>MMP2</i>         | 72 kDa type IV collagenase                               | -6.40  |
| <i>MSP1</i>         | Leucine-rich repeat receptor protein kinase MSP1         | 4.24   |
| <i>Myl1</i>         | Myosin light chain 1/3, skeletal muscle isoform          | -10.62 |
| <i>Myl6</i>         | Myosin light polypeptide 6                               | -11.06 |
| <i>Mylpf</i>        | Myosin regulatory light chain 2, skeletal muscle isoform | -11.03 |
| <i>NAC021</i>       | NAC domain-containing protein 21/22                      | 2.26   |
| <i>NAC031</i>       | Protein CUP-SHAPED COTYLEDON 3                           | 1.67   |
| <i>NAC056</i>       | NAC transcription factor 56                              | -1.71  |
| <i>NAC086</i>       | NAC domain-containing protein 86                         | 1.40   |
| <i>NAC098</i>       | CUP-SHAPED COTYLEDON 2                                   | 3.58   |
| <i>NACK1</i>        | Kinesin-like protein NACK1                               | 2.71   |
| <i>NACK2</i>        | Kinesin-like protein NACK2                               | 1.77   |
| <i>NEK5</i>         | Serine/threonine-protein kinase Nek5                     | -1.61  |
| <i>NET2A</i>        | Protein NETWORKED 2A                                     | -1.33  |
| <i>NET3C</i>        | Protein NETWORKED 3C                                     | 2.14   |
| <i>NPY1</i>         | BTB/POZ domain-containing protein NPY1                   | 1.74   |
| <i>NUP133</i>       | Nuclear pore complex protein NUP133                      | 1.04   |
| <i>OBE1</i>         | Protein OBERON 1                                         | 2.77   |
| <i>Os09g0533900</i> | Endoglucanase 24                                         | 1.57   |
| <i>PAE11</i>        | Pectin acetylesterase 11                                 | 2.51   |
| <i>PAE7</i>         | Pectin acetylesterase 7                                  | 3.52   |
| <i>PAE8</i>         | Pectin acetylesterase 8                                  | 2.04   |
| <i>PALLD</i>        | Palladin                                                 | -8.78  |
| <i>PAP15</i>        | Purple acid phosphatase 15                               | -1.01  |



|                 |                                                          |        |
|-----------------|----------------------------------------------------------|--------|
| <i>PCN</i>      | WD repeat-containing protein PCN                         | -1.24  |
| <i>PDF2</i>     | Homeobox-leucine zipper protein PROTODERMAL FACTOR 2     | 9.05   |
| <i>PHS1</i>     | Protein POOR HOMOLOGOUS SYNAPSIS 1                       | 2.44   |
| <i>plaa2</i>    | Exopolygalacturonase                                     | 1.79   |
| <i>PME15</i>    | Probable pectinesterase 15                               | -8.82  |
| <i>PME17</i>    | Probable pectinesterase/pectinesterase inhibitor 17      | 3.08   |
| <i>PME32</i>    | Pectinesterase/pectinesterase inhibitor PPE8B            | 3.20   |
| <i>PME36</i>    | Probable pectinesterase/pectinesterase inhibitor 36      | 1.78   |
| <i>PME40</i>    | Probable pectinesterase/pectinesterase inhibitor 40      | 1.00   |
| <i>PME53</i>    | Probable pectinesterase 53                               | 2.03   |
| <i>PME7</i>     | Probable pectinesterase/pectinesterase inhibitor 7       | 1.01   |
| <i>PMEI10</i>   | Pectinesterase inhibitor 10                              | 2.80   |
| <i>PPME1</i>    | Pectinesterase PPME1                                     | -1.66  |
| <i>PPME1</i>    | Pectinesterase 2                                         | 1.56   |
| <i>PS1</i>      | FHA domain-containing protein PS1                        | 2.31   |
| <i>PTD</i>      | PARTING DANCERS                                          | 2.20   |
| <i>PTL</i>      | Trihelix transcription factor PTL                        | 1.11   |
| <i>PXC1</i>     | Leucine-rich repeat receptor-like protein kinase PXC1    | 1.36   |
| <i>QKY</i>      | QUIRKY                                                   | 1.77   |
| <i>QUA2</i>     | Probable pectin methyltransferase QUA2                   | 1.37   |
| <i>REF6</i>     | Lysine-specific demethylase REF6                         | -3.17  |
| <i>RHD3</i>     | Protein ROOT HAIR DEFECTIVE 3                            | 2.87   |
| <i>RHF2A</i>    | E3 ubiquitin-protein ligase RHF2A                        | 4.57   |
| <i>RIC4</i>     | CRIB domain-containing protein RIC4                      | -1.15  |
| <i>RMD1</i>     | Sporulation protein RMD1                                 | 1.12   |
| <i>RPD1</i>     | Protein ROOT PRIMORDIUM DEFECTIVE 1                      | -1.12  |
| <i>RPN12A</i>   | 26S proteasome non-ATPase regulatory subunit 8 homolog A | 2.46   |
| <i>RTNLB1</i>   | Reticulon-like protein B1                                | 3.82   |
| <i>SERPINH1</i> | Serpin H1                                                | 9.51   |
| <i>SG1</i>      | protein SLOW GREEN 1, chloroplastic                      | -1.01  |
| <i>SIA1</i>     | Sialyltransferase-like protein 1                         | 1.01   |
| <i>Smg9</i>     | Protein SMG9                                             | 1.25   |
| <i>SP1L1</i>    | SPIRAL1-like 1                                           | 1.98   |
| <i>SRO1</i>     | Probable inactive poly [ADP-ribose] polymerase SRO1      | 4.00   |
| <i>TKPR1</i>    | Tetraketide alpha-pyrone reductase 1                     | 3.66   |
| <i>TKPR2</i>    | Tetraketide alpha-pyrone reductase 2                     | 1.30   |
| <i>TMSB10</i>   | Thymosin beta-10                                         | -12.70 |
| <i>Tmsb4x</i>   | Thymosin beta-4                                          | -11.35 |
| <i>Tmsb4x</i>   | Thymosin beta-11                                         | 12.19  |
| <i>TOR1L2</i>   | TORTIFOLIA1-like protein 2                               | 2.59   |
| <i>TOR1L4</i>   | TORTIFOLIA1-like protein 4                               | 1.06   |
| <i>TPD1</i>     | Protein TAPETUM DETERMINANT 1                            | 9.90   |
| <i>TPM4</i>     | Tropomyosin alpha-4 chain                                | -8.67  |
| <i>TUBA</i>     | Tubulin alpha chain                                      | 2.64   |
| <i>tuba</i>     | Tubulin alpha chain                                      | 10.27  |
| <i>TUBA</i>     | Tubulin alpha chain                                      | 3.09   |
| <i>TUBA</i>     | Tubulin alpha-2 chain                                    | -1.02  |
| <i>TUBA1A</i>   | Tubulin alpha-1A chain                                   | 9.13   |
| <i>TUBA3</i>    | Tubulin alpha-3 chain                                    | -1.09  |
| <i>TUBA6</i>    | Tubulin alpha-6 chain                                    | 2.47   |

|                                           |                                                                        |       |
|-------------------------------------------|------------------------------------------------------------------------|-------|
| <i>TUBB</i>                               | Tubulin beta chain                                                     | -9.30 |
| <i>TUBB1</i>                              | Tubulin beta-1 chain                                                   | 2.29  |
| <i>tubb4</i>                              | Tubulin beta chain                                                     | 1.68  |
| <i>TUBB4</i>                              | Tubulin beta-4 chain                                                   | 2.05  |
| <i>TUBB4B</i>                             | Tubulin beta-3 chain                                                   | -8.77 |
| <i>TUBB4B</i>                             | Tubulin beta-4B chain                                                  | 5.62  |
| <i>ULT2</i>                               | Protein ULTRAPETALA 2                                                  | 1.60  |
| <i>VQ29</i>                               | VQ motif-containing protein 29                                         | 9.25  |
| <i>WAV3</i>                               | E3 ubiquitin-protein ligase WAV3                                       | 4.27  |
| <i>Wdr13</i>                              | WD repeat-containing protein 13                                        | -1.12 |
| <i>WDR55</i>                              | WD repeat-containing protein 55                                        | 1.87  |
| <i>WLIM2B</i>                             | LIM domain-containing protein WLIM2b                                   | 2.72  |
| <i>WOX1</i>                               | WUSCHEL-related homeobox 1                                             | 4.16  |
| <i>WOX11</i>                              | WUSCHEL-related homeobox 11                                            | 9.30  |
| <i>WOX4</i>                               | WUSCHEL-related homeobox 4                                             | 1.75  |
| <i>WOX8</i>                               | WUSCHEL-related homeobox 8                                             | -1.07 |
| <i>WOX9</i>                               | WUSCHEL-related homeobox 9                                             | 5.79  |
| <i>WRAP73</i>                             | WD repeat-containing protein WRAP73                                    | 1.00  |
| <i>XTH8</i>                               | Probable xyloglucan endotransglucosylase/hydrolase protein 8           | 3.28  |
| <i>YAB1</i>                               | Axial regulator YABBY 1                                                | 15.61 |
| <i>YAB5</i>                               | Axial regulator YABBY 5                                                | 9.27  |
| <i>ZPR1</i>                               | LITTLE ZIPPER 1                                                        | -1.03 |
| <b>Cell division/cell differentiation</b> |                                                                        |       |
| <i>5-Aug</i>                              | AUGMIN subunit 5                                                       | -1.52 |
| <i>ACL5</i>                               | Thermospermine synthase ACAULIS5                                       | 2.06  |
| <i>At3g09070</i>                          | Protein OCTOPUS                                                        | 1.09  |
| <i>At3g51280</i>                          | Protein POLLENLESS 3-LIKE 2                                            | 3.42  |
| <i>AUR1</i>                               | Serine/threonine-protein kinase Aurora-1                               | 2.18  |
| <i>BAM1</i>                               | Leucine-rich repeat receptor-like serine/threonine-protein kinase BAM1 | 1.59  |
| <i>CCNG1</i>                              | Cyclin-G1                                                              | 11.37 |
| <i>CDC2</i>                               | Cell division control protein 2 homolog                                | 1.02  |
| <i>CDC20-1</i>                            | Cell division cycle 20.1, cofactor of APC complex                      | 3.07  |
| <i>CDC25</i>                              | Dual specificity phosphatase Cdc25                                     | 1.02  |
| <i>ATHB-14</i>                            | Homeobox-leucine zipper protein ATHB-14                                | 1.33  |
| <i>CYCB2-3</i>                            | G2/mitotic-specific cyclin-2                                           | 2.86  |
| <i>CYCB2-4</i>                            | G2/mitotic-specific cyclin-1                                           | 2.44  |
| <i>CYCD4-2</i>                            | Cyclin-D4-2                                                            | 1.21  |
| <i>DIM1A</i>                              | Ribosomal RNA small subunit methyltransferase                          | -2.70 |
| <i>EB1C</i>                               | Microtubule-associated protein RP/EB family member 1C                  | 1.11  |
| <i>EDE1</i>                               | Protein ENDOSPERM DEFECTIVE 1                                          | 2.78  |
| <i>EPFL2</i>                              | EPIDERMAL PATTERNING FACTOR-like protein 2                             | 1.54  |
| <i>EPFL4</i>                              | EPIDERMAL PATTERNING FACTOR-like protein 4                             | 2.39  |
| <i>ERF11</i>                              | Ethylene-responsive transcription factor 11                            | 9.54  |
| <i>FRL4A</i>                              | FRIGIDA-like protein 4a                                                | 2.80  |
| <i>Fstl1</i>                              | Follistatin-related protein 1                                          | 8.89  |
| <i>FZR3</i>                               | Protein FIZZY-RELATED 3                                                | 2.07  |
| <i>GIF1</i>                               | GRF1-interacting factor 1                                              | 2.57  |
| <i>HD3A</i>                               | Protein HEADING DATE 3A                                                | 5.11  |
| <i>MAD2</i>                               | Mitotic spindle checkpoint protein MAD2                                | 1.06  |
| <i>MAP65-1</i>                            | 65-kDa microtubule-associated protein 1                                | 1.67  |

|                               |                                                 |        |
|-------------------------------|-------------------------------------------------|--------|
| <i>MS5</i>                    | Protein POLLENLESS 3                            | 2.62   |
| <i>ncapd2</i>                 | Condensin complex subunit 1                     | 1.91   |
| <i>ncapg</i>                  | Condensin complex subunit 3                     | 1.15   |
| <i>PATL1</i>                  | Patellin-1                                      | 3.60   |
| <i>PATL3</i>                  | Patellin-3                                      | -1.07  |
| <i>PATL6</i>                  | Patellin-6                                      | 1.40   |
| <i>REV</i>                    | Homeobox-leucine zipper protein REVOLUTA        | 1.46   |
| <i>SCIN</i>                   | Adseverin                                       | 8.78   |
| <i>SCL6</i>                   | Scarecrow-like protein 6                        | 1.25   |
| <i>SPC25</i>                  | Kinetochore protein SPC25 homolog               | 1.07   |
| <i>SPL8</i>                   | Squamosa promoter-binding-like protein 8        | 6.55   |
| <i>SYN1</i>                   | Sister chromatid cohesion 1 protein 1           | 4.49   |
| <i>SYN2</i>                   | Sister chromatid cohesion 1 protein 2           | 1.27   |
| <i>TAGLN</i>                  | Transgelin                                      | -10.97 |
| <i>TAGLN</i>                  | Transgelin                                      | 8.83   |
| <i>TPX2</i>                   | Protein TPX2                                    | 2.65   |
| <i>UFO</i>                    | Protein UNUSUAL FLORAL ORGANS                   | 11.58  |
| <i>WUS</i>                    | Protein WUSCHEL                                 | 4.95   |
| <b>Nutrient reservoir</b>     |                                                 |        |
| <i>At2g18540</i>              | Vicilin-like seed storage protein At2g18540     | 1.47   |
| <i>AT2S1</i>                  | 2S seed storage protein 1                       | -5.29  |
| <i>AT2S2</i>                  | 2S seed storage protein 2                       | -4.29  |
| <i>AT2S3</i>                  | 2S seed storage protein 3                       | -9.95  |
| <i>At4g25140</i>              | Oleosin 18.5 kDa                                | 10.44  |
| <i>CRA1</i>                   | 12S seed storage protein CRA1                   | -4.77  |
| <i>CRB</i>                    | 12S seed storage protein CRB                    | -3.86  |
| <i>CRC</i>                    | 12S seed storage protein CRC                    | -3.42  |
| <i>CRD</i>                    | 12S seed storage protein CRD                    | 1.56   |
| <i>GLUA1</i>                  | Glutelin type-A 1                               | 3.44   |
| <i>LEGA</i>                   | 11S globulin seed storage protein 2             | 8.31   |
| <i>LEGB</i>                   | Legumin B                                       | 10.17  |
| <i>MATP6-A</i>                | Oleosin 18.2 kDa                                | -1.44  |
| <b>Cell redox homeostasis</b> |                                                 |        |
| <i>At1g08570</i>              | Thioredoxin-like 1-1, chloroplastic             | 1.20   |
| <i>At2g35010</i>              | Thioredoxin O1, mitochondrial                   | 1.01   |
| <i>CNGC18</i>                 | Cyclic nucleotide-gated ion channel 18          | 2.57   |
| <i>PDIA3</i>                  | Protein disulfide-isomerase A3                  | -9.19  |
| <i>PDIL2-1</i>                | disulfide-isomerase like 2-1                    | 2.07   |
| <i>TIL</i>                    | Temperature-induced lipocalin-1                 | 3.60   |
| <b>Others</b>                 |                                                 |        |
| <i>N/A</i>                    | Early nodulin-93                                | 1.91   |
| <i>N/A</i>                    | Macrophage migration inhibitory factor homolog  | 1.40   |
| <i>ASP</i>                    | 21 kDa seed protein                             | 2.21   |
| <i>ASY1</i>                   | Meiosis-specific protein ASY1                   | 1.61   |
| <i>BRPF3</i>                  | Bromodomain and PHD finger-containing protein 3 | 2.37   |
| <i>CALD1</i>                  | Caldesmon                                       | -9.92  |
| <i>FAN1</i>                   | Fanconi-associated nuclease 1 homolog           | -1.31  |

---

**Table S6.** Bio-signaling genes differentially expressed in CR and CS.

| Gene name                  | Protein name                                       | log <sub>2</sub><br>Ratio<br>(CR/CS) |
|----------------------------|----------------------------------------------------|--------------------------------------|
| <b>Signal transduction</b> |                                                    |                                      |
| <i>N/A</i>                 | Remorin                                            | 4.67                                 |
| <i>Ankrd13c</i>            | Ankyrin repeat domain-containing protein 13C       | 2.01                                 |
| <i>ANNAT8</i>              | Annexin-like protein RJ4                           | -2.61                                |
| <i>ANXA1</i>               | Annexin A1                                         | 10.06                                |
| <i>ANXA2</i>               | Annexin A2                                         | -9.84                                |
| <i>anxa2-a</i>             | Annexin A2-A                                       | 11.36                                |
| <i>ANXA5</i>               | Annexin A5                                         | -8.90                                |
| <i>At3g19850</i>           | BTB/POZ domain-containing protein At3g19850        | -9.17                                |
| <i>At4g30940</i>           | BTB/POZ domain-containing protein At4g30940        | 2.24                                 |
| <i>ATL29</i>               | RING-H2 finger protein ATL29                       | 2.06                                 |
| <i>ATL67</i>               | RING-H2 finger protein ATL67                       | 4.60                                 |
| <i>BAG1</i>                | BAG family molecular chaperone regulator 1         | 2.00                                 |
| <i>BEH1</i>                | BES1/BZR1 homolog protein 1                        | 9.73                                 |
| <i>BETVIII</i>             | Calcium-binding allergen Bet v 3                   | -1.05                                |
| <i>BI-1</i>                | Bax inhibitor 1                                    | 4.06                                 |
| <i>BKI1</i>                | BRI1 kinase inhibitor 1                            | 2.32                                 |
| <i>C/VIF1</i>              | Cell wall / vacuolar inhibitor of fructosidase 1   | 2.97                                 |
| <i>CAM3</i>                | Calmodulin-3                                       | 8.07                                 |
| <i>CBL7</i>                | Calcineurin B-like protein 7                       | 2.20                                 |
| <i>CCM1</i>                | Calmodulin                                         | 9.18                                 |
| <i>CCT2</i>                | T-complex protein 1 subunit beta                   | 8.74                                 |
| <i>CD63</i>                | CD63 antigen                                       | -9.30                                |
| <i>CET2</i>                | CEN-like protein 2                                 | -7.60                                |
| <i>Cfd</i>                 | Complement factor D                                | -9.99                                |
| <i>CIPK10</i>              | CBL-interacting serine/threonine-protein kinase 10 | -1.51                                |
| <i>CIPK13</i>              | CBL-interacting serine/threonine-protein kinase 13 | 8.21                                 |
| <i>CIPK25</i>              | CBL-interacting serine/threonine-protein kinase 25 | 3.18                                 |
| <i>CIPK3</i>               | CBL-interacting serine/threonine-protein kinase 3  | -1.00                                |
| <i>CIPK5</i>               | CBL-interacting protein kinase 5                   | -1.05                                |
| <i>CIPK5</i>               | CBL-interacting serine/threonine-protein kinase 5  | 3.20                                 |
| <i>CLE27</i>               | CLAVATA3/ESR (CLE)-related protein 27              | 1.03                                 |
| <i>CLE3</i>                | CLAVATA3/ESR (CLE)-related protein 3               | 2.67                                 |
| <i>CLU</i>                 | Clusterin                                          | -9.31                                |
| <i>CML14</i>               | Probable calcium-binding protein CML14             | 1.89                                 |
| <i>CML18</i>               | Probable calcium-binding protein CML18             | 1.34                                 |
| <i>CML18</i>               | Probable calcium-binding protein CML18             | 8.48                                 |
| <i>CML28</i>               | Probable calcium-binding protein CML28             | -1.41                                |
| <i>CML41</i>               | Probable calcium-binding protein CML41             | 2.41                                 |
| <i>CML42</i>               | Calcium-binding protein CML42                      | 4.58                                 |
| <i>CML46</i>               | Probable calcium-binding protein CML46             | -3.75                                |
| <i>COL1A2</i>              | Collagen alpha-2(I) chain                          | -7.09                                |
| <i>Col1a2</i>              | Collagen alpha-2(I) chain                          | -9.84                                |
| <i>CP1</i>                 | Calcium-binding protein CP1                        | 2.56                                 |
| <i>CPR1</i>                | F-box protein CPR1                                 | -8.47                                |
| <i>crabp2</i>              | Cellular retinoic acid-binding protein 2           | 9.84                                 |
| <i>DCN</i>                 | Decorin                                            | -7.60                                |

|                     |                                                                     |        |
|---------------------|---------------------------------------------------------------------|--------|
| <i>ERDJ3B</i>       | DnaJ protein ERDJ3B                                                 | 3.54   |
| <i>FD</i>           | Protein FD                                                          | -1.58  |
| <i>Flna</i>         | Filamin-A                                                           | 9.77   |
| <i>Fth1</i>         | Ferritin heavy chain                                                | -10.63 |
| <i>GAD4</i>         | Glutamate decarboxylase 4                                           | 3.43   |
| <i>GDU1</i>         | Protein GLUTAMINE DUMPER 1                                          | 4.09   |
| <i>GG3</i>          | Guanine nucleotide-binding protein subunit gamma 3                  | -2.21  |
| <i>GNAS</i>         | Guanine nucleotide-binding protein G(s) subunit alpha isoforms XLas | -8.56  |
| <i>gnb2l1</i>       | Guanine nucleotide-binding protein subunit beta-2-like 1            | 12.10  |
| <i>GNL2</i>         | ARF guanine-nucleotide exchange factor GNL2                         | 1.14   |
| <i>GPI8</i>         | GPI-anchor transamidase                                             | 1.10   |
| <i>GRF6</i>         | 14-3-3-like protein GF14 lambda                                     | 2.26   |
| <i>Gtp-bp</i>       | Signal recognition particle receptor subunit alpha homolog          | -1.14  |
| <i>H2-D1</i>        | H-2 class I histocompatibility antigen, D-B alpha chain             | -9.68  |
| <i>HMGA</i>         | HMG-Y-related protein A                                             | 2.14   |
| <i>HSPA8</i>        | Heat shock cognate 71 kDa protein                                   | -8.90  |
| <i>HTH</i>          | Protein HOTHEAD                                                     | -7.81  |
| <i>HTRA1</i>        | Serine protease HTRA1                                               | -10.05 |
| <i>htra1a</i>       | Serine protease HTRA1A                                              | 8.90   |
| <i>IFITM1</i>       | Interferon-induced transmembrane protein 1                          | 9.90   |
| <i>IP5P7</i>        | Type IV inositol polyphosphate 5-phosphatase 7                      | 1.37   |
| <i>IQM1</i>         | IQ domain-containing protein IQM1                                   | -1.98  |
| <i>Itm2b</i>        | Integral membrane protein 2B                                        | -9.51  |
| <i>KRT8</i>         | Keratin, type II cytoskeletal 8                                     | -5.95  |
| <i>LFG2</i>         | Protein LIFEGUARD 2                                                 | 2.16   |
| <i>MAIL3</i>        | Serine/threonine-protein phosphatase 7 long form homolog            | -12.06 |
| <i>MAKR1</i>        | Probable membrane-associated kinase regulator 1                     | 1.65   |
| <i>MYL9</i>         | Myosin regulatory light polypeptide 9                               | -9.88  |
| <i>NAC048</i>       | NAC domain-containing protein 48                                    | -4.07  |
| <i>NBP35</i>        | Cytosolic Fe-S cluster assembly factor NBP35                        | 3.50   |
| <i>Nupr1</i>        | Nuclear protein 1                                                   | 11.10  |
| <i>Otud3</i>        | OTU domain-containing protein 3                                     | 2.82   |
| <i>PAT07</i>        | Probable protein S-acyltransferase 7                                | 1.40   |
| <i>PBLD</i>         | Phenazine biosynthesis-like domain-containing protein               | 4.10   |
| <i>PDIL1-2</i>      | Protein disulfide isomerase-like 1-2                                | 2.20   |
| <i>PFN1</i>         | Profilin-1                                                          | -10.29 |
| <i>PGIP1</i>        | Polygalacturonase inhibitor 1                                       | 3.74   |
| <i>PHR2</i>         | Blue-light photoreceptor PHR2                                       | -1.14  |
| <i>Psap</i>         | Prosaposin                                                          | -9.33  |
| <i>PSAP</i>         | Prosaposin                                                          | -9.13  |
| <i>RAB11B</i>       | Ras-related protein Rab11B                                          | 2.51   |
| <i>RALF</i>         | Rapid alkalization factor                                           | -1.08  |
| <i>RALFL4</i>       | Protein RALF-like 4                                                 | -1.75  |
| <i>RCOM_0864260</i> | CASP-like protein 2B1                                               | 2.23   |
| <i>Rlc-a</i>        | Myosin regulatory light chain 2, smooth muscle minor isoform        | -9.82  |
| <i>ROPGAP2</i>      | Rho GTPase-activating protein 2                                     | 1.28   |
| <i>ROPGEF1</i>      | Rop guanine nucleotide exchange factor 1                            | 1.85   |
| <i>ROPGEF5</i>      | Rop guanine nucleotide exchange factor 5                            | 1.88   |
| <i>RPS3</i>         | 40S ribosomal protein S3                                            | -8.95  |
| <i>S100A14</i>      | Protein S100-A14                                                    | 9.02   |

|                                           |                                                                 |        |
|-------------------------------------------|-----------------------------------------------------------------|--------|
| <i>S100A16</i>                            | Protein S100-A16                                                | 9.62   |
| <i>S100B</i>                              | Protein S100-B                                                  | 9.66   |
| <i>Scgb1a1</i>                            | Uteroglobin                                                     | -11.73 |
| <i>SDI1</i>                               | Protein SULFUR DEFICIENCY-INDUCED 1                             | -1.24  |
| <i>SEC11A</i>                             | Signal peptidase complex catalytic subunit SEC11A               | 4.07   |
| <i>Serpinb1b</i>                          | Leukocyte elastase inhibitor B                                  | 9.67   |
| <i>SERPINE1</i>                           | Plasminogen activator inhibitor 1                               | -9.07  |
| <i>SLC25A6</i>                            | ADP/ATP translocase 3                                           | -7.74  |
| <i>SPARC</i>                              | SPARC                                                           | -8.62  |
| <i>Srprb</i>                              | Signal recognition particle receptor subunit beta               | 1.11   |
| <i>SRR1</i>                               | Protein SENSITIVITY TO RED LIGHT REDUCED 1                      | -1.25  |
| <i>Stxbp5</i>                             | Syntaxin-binding protein 5                                      | -1.21  |
| <i>TGM2</i>                               | Protein-glutamine gamma-glutamyltransferase 2                   | -9.91  |
| <i>Tnfrsf11b</i>                          | Tumor necrosis factor receptor superfamily member 11B           | 9.94   |
| <i>TNNC2</i>                              | Troponin C, skeletal muscle                                     | -11.21 |
| <i>Tnni3</i>                              | Troponin T, fast skeletal muscle                                | -11.06 |
| <b>Hormone mediated signaling pathway</b> |                                                                 |        |
| <i>N/A</i>                                | Auxin-induced protein X10A                                      | -4.94  |
| <i>ABI1</i>                               | Protein phosphatase 2C 56                                       | 1.45   |
| <i>AOC</i>                                | Allene oxide cyclase, chloroplastic                             | -3.20  |
| <i>ARF19</i>                              | Auxin response factor 19                                        | 1.04   |
| <i>ARF5</i>                               | Auxin response factor 5                                         | 2.24   |
| <i>ARF9</i>                               | Auxin response factor 9                                         | 2.52   |
| <i>ARR17</i>                              | Two-component response regulator ARR17                          | 3.74   |
| <i>ARR9</i>                               | Two-component response regulator ARR9                           | -1.59  |
| <i>At1g54200</i>                          | Protein BIG GRAIN 1-like B                                      | 2.27   |
| <i>At1g80440</i>                          | F-box/kelch-repeat protein At1g80440                            | 4.47   |
| <i>At2g30020</i>                          | Probable protein phosphatase 2C 25                              | -1.10  |
| <i>At4g13040</i>                          | Ethylene-responsive transcription factor-like protein At4g13040 | -1.57  |
| <i>AUX22D</i>                             | Auxin-induced protein 22D                                       | 2.53   |
| <i>CDKB2-2</i>                            | Cyclin-dependent kinase B2-2                                    | 2.08   |
| <i>CIP1</i>                               | COP1-interactive protein 1                                      | -1.05  |
| <i>CUL1</i>                               | Cullin-1                                                        | -9.35  |
| <i>DRM1</i>                               | Auxin-repressed 12.5 kDa protein                                | -1.44  |
| <i>EBF2</i>                               | EIN3-binding F-box protein 2                                    | -1.23  |
| <i>EIN3</i>                               | ETHYLENE INSENSITIVE 3                                          | -1.14  |
| <i>ERF010</i>                             | Ethylene-responsive transcription factor ERF010                 | -2.43  |
| <i>ERF034</i>                             | Ethylene-responsive transcription factor ERF034                 | 2.05   |
| <i>ERF061</i>                             | Ethylene-responsive transcription factor ERF061                 | -1.60  |
| <i>ERF071</i>                             | Ethylene-responsive transcription factor ERF071                 | 2.69   |
| <i>ERF073</i>                             | Ethylene-responsive transcription factor ERF073                 | 2.07   |
| <i>ERF087</i>                             | Ethylene-responsive transcription factor ERF087                 | -2.69  |
| <i>ERF110</i>                             | Ethylene-responsive transcription factor ERF110                 | -5.90  |
| <i>ERF14</i>                              | Ethylene-responsive transcription factor 14                     | 8.78   |
| <i>ERF1B</i>                              | Ethylene-responsive transcription factor 1B                     | -4.65  |
| <i>ERF2</i>                               | Ethylene-responsive transcription factor 2                      | 9.52   |
| <i>ERF5</i>                               | Ethylene-responsive transcription factor 5                      | -3.21  |
| <i>GAIPB</i>                              | DELLA protein GAIP-B                                            | 2.35   |
| <i>GASA11</i>                             | Gibberellin-regulated protein 11                                | -6.63  |
| <i>GASA4</i>                              | Gibberellin-regulated protein 4                                 | 8.57   |
| <i>HAB1</i>                               | Protein phosphatase 2C 16                                       | 1.61   |

|                       |                                                                      |        |
|-----------------------|----------------------------------------------------------------------|--------|
| <i>HLS1</i>           | Probable N-acetyltransferase HLS1                                    | -3.34  |
| <i>IAA1</i>           | Auxin-responsive protein IAA1                                        | 2.16   |
| <i>IAA13</i>          | Auxin-responsive protein IAA13                                       | 1.16   |
| <i>IAA20</i>          | Auxin-responsive protein IAA20                                       | 5.53   |
| <i>IAA26</i>          | Auxin-responsive protein IAA26                                       | 1.41   |
| <i>IAA31</i>          | Auxin-responsive protein IAA31                                       | 10.00  |
| <i>IAA8</i>           | Auxin-responsive protein IAA8                                        | 1.76   |
| <i>IAA9</i>           | Auxin-responsive protein IAA9                                        | 3.21   |
| <i>KEG</i>            | E3 ubiquitin-protein ligase KEG                                      | -10.13 |
| <i>LRP1</i>           | Protein LATERAL ROOT PRIMORDIUM 1                                    | 2.24   |
| <i>MARD1</i>          | Protein MARD1                                                        | 1.89   |
| <i>MSPR10-1</i>       | Major allergen Pru ar 1                                              | -2.57  |
| <i>NHL6</i>           | NDR1/HIN1-like protein 6                                             | -2.94  |
| <i>NPR6</i>           | Regulatory protein NPR6                                              | 1.13   |
| <i>PARC</i>           | Probable glutathione S-transferase                                   | -2.38  |
| <i>PCKR3</i>          | Major allergen Api g 1, isoallergen 2                                | 4.66   |
| <i>PIN1B</i>          | Probable auxin efflux carrier component 1b                           | 1.99   |
| <i>PIN1C</i>          | Probable auxin efflux carrier component 1c                           | 2.61   |
| <i>PIN6</i>           | Auxin efflux carrier component 6                                     | -1.96  |
| <i>PRP1</i>           | Probable glutathione S-transferase                                   | -1.76  |
| <i>PYL5</i>           | Abscisic acid receptor PYL5                                          | 2.41   |
| <i>PYL7</i>           | Abscisic acid receptor PYL7                                          | 3.67   |
| <i>PYR1</i>           | Abscisic acid receptor PYR1                                          | 3.14   |
| <i>RAP2-3</i>         | Ethylene-responsive transcription factor RAP2-3                      | -2.68  |
| <i>RGLG1</i>          | E3 ubiquitin-protein ligase RGLG1                                    | 3.98   |
| <i>RNL</i>            | tRNA ligase 1                                                        | 1.94   |
| <i>RR10</i>           | Two-component response regulator ORR10                               | -1.46  |
| <i>SAPK2</i>          | Serine/threonine-protein kinase SAPK2                                | 1.13   |
| <i>SAUR32</i>         | Auxin-responsive protein SAUR32                                      | -1.92  |
| <i>SAUR36</i>         | Auxin-responsive protein SAUR36                                      | -2.51  |
| <i>SAUR50</i>         | Auxin-responsive protein SAUR50                                      | 4.58   |
| <i>SAUR71</i>         | Auxin-responsive protein SAUR71                                      | -2.95  |
| <i>SAUR72</i>         | Auxin-responsive protein SAUR72                                      | -1.65  |
| <i>SHN3</i>           | Ethylene-responsive transcription factor SHINE 3                     | -2.03  |
| <i>SKP1A</i>          | SKP1-like protein 1A                                                 | 8.70   |
| <i>SRK2E</i>          | Serine/threonine-protein kinase SRK2E                                | 3.47   |
| <i>SRT1</i>           | NAD-dependent protein deacetylase SRT1                               | 1.01   |
| <i>SRT2</i>           | NAD-dependent protein deacetylase SRT2                               | 1.00   |
| <i>TIFY6B</i>         | Protein TIFY 6B                                                      | -1.08  |
| <i>TIMP1</i>          | Metalloproteinase inhibitor 1                                        | -10.48 |
| <i>Timp2</i>          | Metalloproteinase inhibitor 2                                        | 11.30  |
| <i>TPL</i>            | Protein TOPLESS                                                      | -1.44  |
| <i>TTL1</i>           | TPR repeat-containing thioredoxin TTL1                               | 1.22   |
| <i>VAB</i>            | VAN3-binding protein                                                 | 2.04   |
| <b>Protein kinase</b> |                                                                      |        |
| <i>ACTA2</i>          | Actin, aortic smooth muscle                                          | -8.28  |
| <i>AFC2</i>           | Serine/threonine-protein kinase AFC2                                 | -1.64  |
| <i>ASK3</i>           | Shaggy-related protein kinase gamma                                  | 3.30   |
| <i>At1g12460</i>      | Probable LRR receptor-like serine/threonine-protein kinase At1g12460 | 2.01   |
| <i>At2g23950</i>      | Probable LRR receptor-like serine/threonine-protein kinase At2g23950 | 1.64   |
| <i>At2g24230</i>      | Probable LRR receptor-like serine/threonine-protein kinase At2g24230 | 1.70   |

|                  |                                                                                |        |
|------------------|--------------------------------------------------------------------------------|--------|
| <i>At2g40270</i> | Inactive receptor-like serine/threonine-protein kinase At2g40270               | 8.42   |
| <i>At2g44130</i> | F-box/kelch-repeat protein At2g44130                                           | -1.21  |
| <i>At3g03770</i> | Probable inactive leucine-rich repeat receptor-like protein kinase At3g03770   | 1.91   |
| <i>At3g05640</i> | Probable protein phosphatase 2C 34                                             | -3.02  |
| <i>At3g47570</i> | Probable LRR receptor-like serine/threonine-protein kinase At3g47570           | -1.02  |
| <i>At3g51470</i> | Probable protein phosphatase 2C 47                                             | 4.39   |
| <i>At3g51990</i> | Serine/threonine-protein kinase-like protein At3g51990                         | -1.02  |
| <i>At4g28400</i> | Probable protein phosphatase 2C 58                                             | -1.37  |
| <i>At4g36180</i> | Probable LRR receptor-like serine/threonine-protein kinase At4g36180           | 1.77   |
| <i>At5g05200</i> | Uncharacterized aarF domain-containing protein kinase At5g05200, chloroplastic | -1.03  |
| <i>At5g18400</i> | Anamorsin homolog                                                              | 3.29   |
| <i>At5g67200</i> | Probable inactive receptor kinase At5g67200                                    | 1.26   |
| <i>ATPK2</i>     | Serine/threonine-protein kinase AtPK2/AtPK19                                   | 8.79   |
| <i>ATR</i>       | Serine/threonine-protein kinase ATR                                            | 1.90   |
| <i>BLUS1</i>     | Serine/threonine-protein kinase BLUS1                                          | -1.96  |
| <i>BRL2</i>      | Brassinosteroid LRR receptor kinase BRL2                                       | -4.01  |
| <i>BSK2</i>      | Serine/threonine-protein kinase BSK2                                           | 1.64   |
| <i>BSL1</i>      | Serine/threonine-protein phosphatase BSL1                                      | 4.89   |
| <i>CCR2</i>      | Serine/threonine-protein kinase-like protein CCR2                              | 2.06   |
| <i>Cdc7</i>      | Cell division cycle 7-related protein kinase                                   | 1.41   |
| <i>Ckm</i>       | Creatine kinase M-type                                                         | -11.11 |
| <i>CRK25</i>     | Cysteine-rich receptor-like protein kinase 25                                  | -1.99  |
| <i>CRK36</i>     | Cysteine-rich receptor-like protein kinase 36                                  | 1.01   |
| <i>CYCA1-1</i>   | Cyclin-A1-1                                                                    | 3.45   |
| <i>CYCA2-1</i>   | Cyclin-A2-1                                                                    | 1.39   |
| <i>CYCA2-4</i>   | Cyclin-A2-4                                                                    | 1.90   |
| <i>CYCA3-2</i>   | Cyclin-A3-2                                                                    | 2.06   |
| <i>CYCD3-3</i>   | Cyclin-D3-3                                                                    | 1.12   |
| <i>CYCD4-1</i>   | Cyclin-D4-1                                                                    | 1.07   |
| <i>CYCD5-1</i>   | Cyclin-D5-1                                                                    | 1.05   |
| <i>CYCD6-1</i>   | Cyclin-D6-1                                                                    | -1.77  |
| <i>CYCP3-1</i>   | Cyclin-P3-1                                                                    | 2.03   |
| <i>CYCU4-1</i>   | Cyclin-U4-1                                                                    | -1.49  |
| <i>D6PKL2</i>    | Protein kinase PVPK-1                                                          | 1.00   |
| <i>GRIK2</i>     | Serine/threonine-protein kinase GRIK2                                          | -1.18  |
| <i>HD16</i>      | Casein kinase 1-like protein HD16                                              | 4.63   |
| <i>HT1</i>       | Serine/threonine/tyrosine-protein kinase HT1                                   | 3.42   |
| <i>ILK1</i>      | Integrin-linked protein kinase 1                                               | 2.28   |
| <i>IMK3</i>      | Probable leucine-rich repeat receptor-like protein kinase IMK3                 | 3.72   |
| <i>KINB2</i>     | SNF1-related protein kinase regulatory subunit beta-2                          | -2.13  |
| <i>KING1</i>     | SNF1-related protein kinase regulatory subunit gamma-1                         | 9.17   |
| <i>KRP7</i>      | Cyclin-dependent kinase inhibitor 7                                            | 1.73   |
| <i>LECRKS5</i>   | Probable L-type lectin-domain containing receptor kinase S.5                   | -1.63  |
| <i>LYK2</i>      | Protein LYK2                                                                   | 3.27   |
| <i>LYK5</i>      | LYK5                                                                           | -2.71  |
| <i>MAPKKK17</i>  | Mitogen-activated protein kinase kinase kinase 17                              | -1.22  |
| <i>MIK1</i>      | MDIS1-interacting receptor like kinase 1                                       | 5.61   |
| <i>MKK9</i>      | Mitogen-activated protein kinase kinase 9                                      | -2.16  |
| <i>MPK3</i>      | Mitogen-activated protein kinase 3                                             | -2.71  |



|                     |                                                                 |       |
|---------------------|-----------------------------------------------------------------|-------|
| <i>NEK2</i>         | Serine/threonine-protein kinase Nek2                            | 1.10  |
| <i>NEK6</i>         | Serine/threonine-protein kinase Nek6                            | -1.46 |
| <i>NIK3</i>         | Protein NSP-INTERACTING KINASE 3                                | 2.51  |
| <i>NPG1</i>         | Protein NPG1                                                    | 1.41  |
| <i>Os01g0656200</i> | Probable protein phosphatase 2C 8                               | -2.84 |
| <i>OsI_35105</i>    | Pyruvate kinase 1, cytosolic                                    | 3.51  |
| <i>OXI1</i>         | Serine/threonine-protein kinase OXI1                            | 9.39  |
| <i>PBL10</i>        | Probable serine/threonine-protein kinase PBL10                  | -1.20 |
| <i>PERK1</i>        | Proline-rich receptor-like protein kinase PERK1                 | 1.80  |
| <i>PERK10</i>       | Proline-rich receptor-like protein kinase PERK10                | 1.39  |
| <i>PERK3</i>        | Proline-rich receptor-like protein kinase PERK3                 | 1.81  |
| <i>PERK4</i>        | Proline-rich receptor-like protein kinase PERK4                 | -3.16 |
| <i>PHY1</i>         | Light-sensor Protein kinase                                     | 1.59  |
| <i>PID</i>          | Protein kinase PINOID                                           | 3.87  |
| <i>PIP5K2</i>       | Phosphatidylinositol 4-phosphate 5-kinase 2                     | 1.02  |
| <i>PPCK2</i>        | Phosphoenolpyruvate carboxylase kinase 2                        | 8.99  |
| <i>PPDK</i>         | Pyruvate, phosphate dikinase 1, chloroplastic                   | 4.08  |
| <i>PPX2</i>         | Serine/threonine-protein phosphatase PP-X isozyme 2             | 3.52  |
| <i>PRK4</i>         | Pollen receptor-like kinase 4                                   | -1.65 |
| <i>PSKR1</i>        | Phytosulfokine receptor 1                                       | -4.69 |
| <i>PSY1R</i>        | Tyrosine-sulfated glycopeptide receptor 1                       | -3.74 |
| <i>PTI13</i>        | PTI1-like tyrosine-protein kinase 3                             | 5.00  |
| <i>PUB14</i>        | U-box domain-containing protein 14                              | 3.31  |
| <i>PUB34</i>        | U-box domain-containing protein 34                              | -1.21 |
| <i>PUB38</i>        | U-box domain-containing protein 38                              | -1.50 |
| <i>PUB51</i>        | U-box domain-containing protein 51                              | -1.80 |
| <i>PV42A</i>        | SNF1-related protein kinase regulatory subunit gamma-like PV42a | -3.56 |
| <i>PXC3</i>         | Leucine-rich repeat receptor-like tyrosine-protein kinase PXC3  | 2.57  |
| <i>RCH2</i>         | Receptor-like protein kinase 2                                  | -1.17 |
| <i>RGI3</i>         | LRR receptor-like serine/threonine-protein kinase               | 1.60  |
| <i>RKL1</i>         | Probable inactive receptor kinase At1g48480                     | 1.61  |
| <i>SMR15</i>        | Cyclin-dependent protein kinase inhibitor SMR15                 | 1.12  |
| <i>THE1</i>         | Receptor-like protein kinase THESEUS 1                          | -1.15 |
| <i>TIO</i>          | Serine/threonine-protein kinase TIO                             | -2.39 |
| <i>TMK1</i>         | Receptor protein kinase TMK1                                    | -1.18 |
| <i>V-FGR</i>        | Tyrosine-protein kinase transforming protein Fgr                | 12.40 |
| <i>WAKL15</i>       | Wall-associated receptor kinase-like 15                         | 3.06  |
| <i>WAKL20</i>       | Wall-associated receptor kinase-like 20                         | -4.77 |
| <i>wif1</i>         | Wnt inhibitory factor 1                                         | 10.11 |
| <i>WNK1</i>         | Serine/threonine-protein kinase WNK1                            | 1.57  |
| <i>WNK11</i>        | Probable serine/threonine-protein kinase WNK11                  | 1.39  |
| <i>XLG3</i>         | Extra-large guanine nucleotide-binding protein 3                | -1.98 |

---

**Table S7.** Stress response genes differentially expressed in CR and CS.

| Gene name                 | Protein name                                            | log <sub>2</sub><br>Ratio<br>(CR/CS) |
|---------------------------|---------------------------------------------------------|--------------------------------------|
| <b>Heat shock protein</b> |                                                         |                                      |
| <i>AHSA1</i>              | Activator of 90 kDa heat shock protein ATPase homolog 1 | 3.29                                 |
| <i>hsc71</i>              | Heat shock cognate 70 kDa protein                       | -8.44                                |
| <i>HSP17.6</i>            | 17.6 kDa class II heat shock protein                    | 6.06                                 |
| <i>HSP17.6B</i>           | 17.6 kDa class I heat shock protein 2                   | 8.02                                 |
| <i>HSP17.6C</i>           | 17.6 kDa class I heat shock protein 3                   | 4.72                                 |
| <i>HSP17.7</i>            | 17.1 kDa class II heat shock protein                    | 1.44                                 |
| <i>HSP18.1</i>            | 18.1 kDa class I heat shock protein                     | 9.64                                 |
| <i>HSP18.2</i>            | 18.2 kDa class I heat shock protein                     | 3.72                                 |
| <i>HSP18.5-C</i>          | 18.5 kDa class I heat shock protein                     | 1.01                                 |
| <i>HSP22.0</i>            | 22.0 kDa class IV heat shock protein                    | 2.51                                 |
| <i>HSP23.6</i>            | 23.6 kDa heat shock protein, mitochondrial              | -4.44                                |
| <i>HSP26.5</i>            | 26.5 kDa heat shock protein, mitochondrial              | 8.75                                 |
| <i>HSP70-14</i>           | Heat shock 70 kDa protein 14                            | 4.41                                 |
| <i>HSP70-5</i>            | Heat shock 70 kDa protein 5                             | 9.70                                 |
| <i>HSP70-9</i>            | Heat shock 70 kDa protein 9, mitochondrial              | 8.64                                 |
| <i>HSP90-2</i>            | Heat shock protein 90-2                                 | 3.13                                 |
| <i>HSP90-4</i>            | Heat shock protein 90-4                                 | 8.55                                 |
| <i>HSP90AA1</i>           | Heat shock protein HSP 90-alpha                         | -9.07                                |
| <i>HSPA8</i>              | Heat shock cognate 71 kDa protein                       | -8.90                                |
| <i>hspa8</i>              | Heat shock cognate 71 kDa protein                       | 8.20                                 |
| <i>HSP70</i>              | Heat shock cognate 70 kDa protein                       | -1.11                                |
| <b>Abiotic stress</b>     |                                                         |                                      |
| <i>N/A</i>                | Desiccation-related protein PCC13-62                    | 1.34                                 |
| <i>ABCG11</i>             | ABC transporter G family member 11                      | 7.35                                 |
| <i>ACR8</i>               | ACT domain-containing protein ACR8                      | 2.54                                 |
| <i>ACT2</i>               | Actin-2                                                 | 1.78                                 |
| <i>ADH1</i>               | Alcohol dehydrogenase class-P                           | 3.79                                 |
| <i>AHK4</i>               | Histidine kinase 4                                      | 1.75                                 |
| <i>ALDH3H1</i>            | Aldehyde dehydrogenase family 3 member H1               | -2.47                                |
| <i>APS2</i>               | ATP sulfurylase 2                                       | -1.60                                |
| <i>ARG7</i>               | Indole-3-acetic acid-induced protein ARG7               | 1.32                                 |
| <i>ARIA</i>               | ARM REPEAT PROTEIN INTERACTING WITH ABF2                | 1.28                                 |
| <i>At1g04770</i>          | Protein SULFUR DEFICIENCY-INDUCED 2                     | 3.32                                 |
| <i>At1g18250</i>          | Osmotin-like protein                                    | 1.55                                 |
| <i>At1g59620</i>          | Probable disease resistance protein At1g59620           | -1.70                                |
| <i>At1g75040</i>          | Pathogenesis-related protein 5                          | -6.12                                |
| <i>At2g14610</i>          | Pathogenesis-related protein 1                          | -8.99                                |
| <i>At3g16530</i>          | Lectin-like protein At3g16530                           | 3.64                                 |
| <i>At3g17800</i>          | UV-B-induced protein At3g17800, chloroplastic           | 8.41                                 |
| <i>At3g26430</i>          | Esterase                                                | -2.62                                |
| <i>At3g28600</i>          | AAA-ATPase At3g28600                                    | -10.18                               |
| <i>At4g32940</i>          | Vacuolar-processing enzyme gamma-isozyme                | 3.22                                 |
| <i>At5g05600</i>          | Probable 2-oxoglutarate-dependent dioxygenase At5g05600 | -4.10                                |
| <i>ATJ8</i>               | Chaperone protein dnaJ 8, chloroplastic                 | 3.29                                 |
| <i>ATL24</i>              | NEP1-interacting protein-like 2                         | 3.73                                 |
| <i>BAP1</i>               | BON1-associated protein 1                               | 3.46                                 |

|                 |                                                                      |        |
|-----------------|----------------------------------------------------------------------|--------|
| <i>BIP4</i>     | Luminal-binding protein 4                                            | -1.68  |
| <i>BSMT1</i>    | Salicylate/benzoate carboxyl methyltransferase                       | -1.13  |
| <i>BZIP9</i>    | Basic leucine zipper 9                                               | 1.97   |
| <i>CAMBP25</i>  | Calmodulin-binding protein 25                                        | 1.57   |
| <i>CAMTA5</i>   | Calmodulin-binding transcription activator 5                         | -2.48  |
| <i>CAT1</i>     | Catalase-1                                                           | 3.95   |
| <i>CAT2</i>     | Catalase-2                                                           | 4.88   |
| <i>CAT3</i>     | Catalase-3                                                           | 2.98   |
| <i>CHY1</i>     | 3-hydroxyisobutyryl-CoA hydrolase 1                                  | 1.24   |
| <i>CIPK21</i>   | CBL-interacting serine/threonine-protein kinase 21                   | -2.57  |
| <i>CML9</i>     | Calmodulin-like protein 9                                            | 2.62   |
| <i>Col3a1</i>   | Collagen alpha-1(III) chain                                          | -10.35 |
| <i>COPT6</i>    | Copper transporter 6                                                 | 3.78   |
| <i>CP12-3</i>   | Calvin cycle protein CP12-3, chloroplastic                           | 4.45   |
| <i>CPC</i>      | Transcription factor CPC                                             | -1.10  |
| <i>CRPK1</i>    | Cold-responsive protein kinase 1                                     | -1.04  |
| <i>CRRSP55</i>  | Cysteine-rich repeat secretory protein 55                            | 3.58   |
| <i>CRT1</i>     | Calreticulin-1                                                       | 2.10   |
| <i>CYCLASE1</i> | Cyclase-like protein 1                                               | 3.76   |
| <i>CYP81F2</i>  | Cytochrome P450 81F2                                                 | 3.43   |
| <i>CYS4</i>     | Cysteine proteinase inhibitor 4                                      | 9.69   |
| <i>CYS6</i>     | Cysteine proteinase inhibitor 6                                      | 4.95   |
| <i>DRM1</i>     | Dormancy-associated protein 1                                        | 4.72   |
| <i>ERD14</i>    | Dehydrin ERD14                                                       | 4.04   |
| <i>ERD15</i>    | Protein EARLY RESPONSIVE TO DEHYDRATION 15                           | 3.80   |
| <i>ERD7</i>     | Protein EARLY-RESPONSIVE TO DEHYDRATION 7, chloroplastic             | 4.27   |
| <i>ERECTA</i>   | LRR receptor-like serine/threonine-protein kinase ERECTA             | 3.69   |
| <i>ERF012</i>   | Ethylene-responsive transcription factor ERF012                      | 4.50   |
| <i>EXL2</i>     | Protein EXORDIUM-like 2                                              | 3.50   |
| <i>FAD-OXR</i>  | Berberine bridge enzyme-like 22                                      | 3.06   |
| <i>FAMT</i>     | Farnesoic acid carboxyl-O-methyltransferase                          | -13.41 |
| <i>FAX5</i>     | Protein FATTY ACID EXPORT 5                                          | 8.38   |
| <i>FQR1</i>     | NAD(P)H dehydrogenase (quinone) FQR1                                 | 1.86   |
| <i>GH3.1</i>    | Probable indole-3-acetic acid-amido synthetase GH3.1                 | 5.84   |
| <i>GH3.6</i>    | Probable indole-3-acetic acid-amido synthetase GH3.6                 | -1.42  |
| <i>HAT22</i>    | Homeobox-leucine zipper protein HAT22                                | 2.07   |
| <i>Hba</i>      | Hemoglobin subunit alpha                                             | -11.54 |
| <i>Hbb-b1</i>   | Hemoglobin subunit beta-1                                            | -11.83 |
| <i>HDT3</i>     | Histone deacetylase HDT3                                             | 2.97   |
| <i>HSPRO2</i>   | Nematode resistance protein-like HSPRO2                              | 9.01   |
| <i>HVA22A</i>   | HVA22-like protein a                                                 | -1.32  |
| <i>krt8</i>     | Intermediate filament protein ON3                                    | 9.66   |
| <i>LA1</i>      | Protein LAZY 1                                                       | 1.64   |
| <i>LECRK2</i>   | G-type lectin S-receptor-like serine/threonine-protein kinase LECRK2 | -4.86  |
| <i>LECRK3</i>   | G-type lectin S-receptor-like serine/threonine-protein kinase LECRK3 | 4.03   |
| <i>LRR1</i>     | Leucine-rich repeat protein 1                                        | 2.30   |
| <i>LTi65</i>    | Low-temperature-induced 65 kDa protein                               | -1.06  |
| <i>MED37D</i>   | Probable mediator of RNA polymerase II transcription subunit 37c     | 2.43   |
| <i>MED37F</i>   | Mediator of RNA polymerase II transcription subunit 37f              | 2.03   |
| <i>MEE14</i>    | CCG-binding protein 1                                                | 3.91   |
| <i>MGL</i>      | Methionine gamma-lyase                                               | 11.82  |

|                       |                                                                          |        |
|-----------------------|--------------------------------------------------------------------------|--------|
| <i>MLP329</i>         | MLP-like protein 329                                                     | -1.22  |
| <i>MLP34</i>          | MLP-like protein 34                                                      | -8.09  |
| <i>Mmp2</i>           | 72 kDa type IV collagenase                                               | 9.70   |
| <i>MPSR1</i>          | E3 ubiquitin-protein ligase MPSR1                                        | 4.48   |
| <i>Mtnd1</i>          | NADH-ubiquinone oxidoreductase chain 1                                   | -10.76 |
| <i>MYB102</i>         | Transcription factor MYB102                                              | -4.17  |
| <i>MYB16</i>          | Transcription factor MYB16                                               | 2.77   |
| <i>MYB2</i>           | Transcription factor MYB2                                                | -5.60  |
| <i>MYB20</i>          | Transcription factor MYB20                                               | 2.02   |
| <i>MYB3</i>           | Transcription factor MYB3                                                | -2.45  |
| <i>MYB5</i>           | Transcription repressor MYB5                                             | -1.42  |
| <i>MYB78</i>          | Transcription factor MYB78                                               | -1.90  |
| <i>NAC002</i>         | NAC domain-containing protein 2                                          | 3.78   |
| <i>NAC102</i>         | NAC domain-containing protein 102                                        | 3.03   |
| <i>NDA1</i>           | Internal alternative NAD(P)H-ubiquinone oxidoreductase A1, mitochondrial | -1.40  |
| <i>NFD4</i>           | NUCLEAR FUSION DEFECTIVE 4                                               | 2.65   |
| <i>NOI4</i>           | Protein NOI4                                                             | 4.02   |
| <i>NPF4.3</i>         | Protein NRT1/ PTR FAMILY 4.3                                             | -3.18  |
| <i>NPR1</i>           | BTB/POZ domain and ankyrin repeat-containing protein NPR1                | -1.23  |
| <i>ORS1</i>           | Protein ORGAN SIZE RELATED 1                                             | 3.08   |
| <i>PBL16</i>          | Probable serine/threonine-protein kinase PBL16                           | 1.15   |
| <i>PBL23</i>          | Probable serine/threonine-protein kinase PBL23                           | 1.28   |
| <i>PBP1</i>           | Calcium-binding protein PBP1                                             | 2.79   |
| <i>PCAP1</i>          | Plasma membrane-associated cation-binding protein 1                      | 3.26   |
| <i>PCO1</i>           | Plant cysteine oxidase 1                                                 | 3.27   |
| <i>PCO2</i>           | Plant cysteine oxidase 2                                                 | 3.42   |
| <i>PCR2</i>           | Protein PLANT CADMIUM RESISTANCE 2                                       | 9.46   |
| <i>PDC2</i>           | Pyruvate decarboxylase 2                                                 | 6.48   |
| <i>PDIL2-3</i>        | disulfide-isomerase 2-3                                                  | 3.59   |
| <i>PER19</i>          | Peroxidase 19                                                            | -1.76  |
| <i>PER26</i>          | Probable peroxidase 26                                                   | 2.47   |
| <i>PER40</i>          | Peroxidase 40                                                            | 6.73   |
| <i>PI4KG5</i>         | Phosphatidylinositol 4-kinase gamma 5                                    | 3.19   |
| <i>PICBP</i>          | Calmodulin binding protein PICBP                                         | -2.36  |
| <i>PLAT1</i>          | PLAT domain-containing protein 1                                         | 3.96   |
| <i>PLDALPHA<br/>4</i> | Phospholipase D alpha 4                                                  | 1.13   |
| <i>PRB1</i>           | Pathogenesis-related protein 1                                           | -3.91  |
| <i>PRUA1</i>          | Major allergen Pru av 1                                                  | -1.22  |
| <i>PS2</i>            | Inorganic pyrophosphatase 1                                              | 4.40   |
| <i>PUB21</i>          | U-box domain-containing protein 21                                       | -3.33  |
| <i>PUB26</i>          | U-box domain-containing protein 26                                       | 2.83   |
| <i>PYM</i>            | POLYHOME                                                                 | 1.35   |
| <i>RACK1</i>          | Receptor of activated protein C kinase 1                                 | -8.43  |
| <i>RBG4</i>           | Glycine-rich RNA-binding protein 4, mitochondrial                        | 1.54   |
| <i>RBOHD</i>          | Respiratory burst oxidase homolog protein D                              | 3.01   |
| <i>RD22</i>           | BURP domain protein RD22                                                 | 9.42   |
| <i>RIPt</i>           | Beta-galactoside-specific lectin 3                                       | -8.20  |
| <i>Rplp2</i>          | 60S acidic ribosomal protein P2                                          | 10.95  |
| <i>RVE6</i>           | Protein REVEILLE 6                                                       | 1.46   |

|                      |                                                                  |        |
|----------------------|------------------------------------------------------------------|--------|
| <i>Saa3</i>          | Serum amyloid A-3 protein                                        | -9.99  |
| <i>SAG21</i>         | Protein SENESENCE-ASSOCIATED GENE 21, mitochondrial              | 3.82   |
| <i>SDIR1</i>         | E3 ubiquitin-protein ligase SDIR1                                | -1.75  |
| <i>SIZ1</i>          | E3 SUMO-protein ligase SIZ1                                      | 4.40   |
| <i>SLE3</i>          | Protein SLE3                                                     | -1.49  |
| <i>SN1</i>           | Snakin-1                                                         | 3.82   |
| <i>SNAP33</i>        | SNAP25 homologous protein SNAP33                                 | 3.18   |
| <i>SOT12</i>         | Cytosolic sulfotransferase 12                                    | -1.28  |
| <i>SPARC</i>         | SPARC                                                            | 10.29  |
| <i>SRC2</i>          | Protein SRC2 homolog                                             | 3.98   |
| <i>SRO5</i>          | Probable inactive poly [ADP-ribose] polymerase SRO5              | 2.87   |
| <i>SUS1</i>          | Sucrose synthase 1                                               | 2.66   |
| <i>TAR2</i>          | Tryptophan aminotransferase-related protein 2                    | 1.50   |
| <i>TRX5</i>          | Thioredoxin H5                                                   | -1.42  |
| <i>TTL4</i>          | TPR repeat-containing thioredoxin TTL4                           | 2.88   |
| <i>UGT85K5</i>       | Linamarin synthase 2                                             | -3.32  |
| <i>ULP1D</i>         | Ubiquitin-like-specific protease 1D                              | 2.71   |
| <i>VQ18</i>          | VQ motif-containing protein 18                                   | 4.85   |
| <i>VQ20</i>          | VQ motif-containing protein 20                                   | 1.24   |
| <i>WRKY23</i>        | WRKY transcription factor 23                                     | -1.55  |
| <i>WRKY33</i>        | Probable WRKY transcription factor 33                            | 3.40   |
| <i>WRKY70</i>        | Probable WRKY transcription factor 70                            | -3.04  |
| <i>WSCP</i>          | Kunitz trypsin inhibitor 2                                       | -9.73  |
| <b>Biotic stress</b> |                                                                  |        |
| <i>N/A</i>           | Non-specific lipid-transfer protein 1                            | 8.82   |
| <i>AAE3</i>          | Oxalate--CoA ligase                                              | -12.13 |
| <i>ADF4</i>          | Actin-depolymerizing factor 4                                    | -1.01  |
| <i>AGO5</i>          | Protein argonaute 5                                              | 1.27   |
| <i>AHL20</i>         | AT-hook motif nuclear-localized protein 20                       | -8.55  |
| <i>AMP2-2</i>        | Vicilin-like antimicrobial peptides 2-2                          | -7.21  |
| <i>At3g59930</i>     | Defensin-like protein 206                                        | -9.44  |
| <i>At4g20830</i>     | Berberine bridge enzyme-like 19                                  | 3.19   |
| <i>ATL6</i>          | E3 ubiquitin-protein ligase ATL6                                 | -1.44  |
| <i>ATTI1</i>         | Defensin-like protein 195                                        | 2.86   |
| <i>B2m</i>           | Beta-2-microglobulin                                             | -10.25 |
| <i>b2m</i>           | Beta-2-microglobulin                                             | 9.22   |
| <i>BAG6</i>          | BAG family molecular chaperone regulator 6                       | 8.64   |
| <i>BAH1</i>          | E3 ubiquitin-protein ligase BAH1                                 | 5.27   |
| <i>BBD1</i>          | Bifunctional nuclease 1                                          | 3.21   |
| <i>BIG5</i>          | Brefeldin A-inhibited guanine nucleotide-exchange protein 5      | 9.13   |
| <i>BIR2</i>          | Inactive LRR receptor-like serine/threonine-protein kinase BIR2  | 8.23   |
| <i>Ca3</i>           | Carbonic anhydrase 3                                             | -10.70 |
| <i>CRK8</i>          | Cysteine-rich receptor-like protein kinase 8                     | -1.27  |
| <i>CRN</i>           | Inactive leucine-rich repeat receptor-like protein kinase CORYNE | 2.89   |
| <i>CYP81D11</i>      | Cytochrome P450 81D11                                            | 3.93   |
| <i>EDR4</i>          | Protein ENHANCED DISEASE RESISTANCE 4                            | -1.08  |
| <i>eef-2</i>         | Elongation factor 2                                              | 8.84   |
| <i>ELF5A-2</i>       | Eukaryotic translation initiation factor 5A-2                    | 2.14   |
| <i>EXO70B1</i>       | Exocyst complex component EXO70B1                                | 9.78   |
| <i>HEL</i>           | Hevein-like preproprotein                                        | 2.51   |
| <i>HIR3</i>          | Hypersensitive-induced response protein 3                        | 2.52   |

|                |                                                                    |        |
|----------------|--------------------------------------------------------------------|--------|
| <i>Hp</i>      | Haptoglobin                                                        | -8.84  |
| <i>KTI1</i>    | Kunitz trypsin inhibitor 4                                         | 2.42   |
| <i>LYK3</i>    | LysM domain receptor-like kinase 3                                 | -1.24  |
| <i>LYK4</i>    | LysM domain receptor-like kinase 4                                 | -3.47  |
| <i>Lyz2</i>    | Lysozyme C-2                                                       | -10.97 |
| <i>MES1</i>    | Methylesterase 1                                                   | 7.05   |
| <i>MLO2</i>    | MLO-like protein 2                                                 | 2.11   |
| <i>NHL10</i>   | NDR1/HIN1-like protein 10                                          | 3.38   |
| <i>NHL13</i>   | NDR1/HIN1-like protein 13                                          | 1.84   |
| <i>NHL3</i>    | NDR1/HIN1-like protein 3                                           | 3.28   |
| <i>OSM34</i>   | Osmotin-like protein OSM34                                         | 2.91   |
| <i>PBL13</i>   | Serine/threonine-protein kinase PBL13                              | 3.21   |
| <i>PCRK1</i>   | Serine/threonine-protein kinase PCRK1                              | -1.58  |
| <i>PDF2.5</i>  | Defensin-like protein                                              | 4.89   |
| <i>PHOS34</i>  | Universal stress protein PHOS34                                    | 2.05   |
| <i>PII-2</i>   | Piriformospora indica-insensitive protein 2                        | 6.84   |
| <i>PR5K</i>    | PR5-like receptor kinase                                           | 4.38   |
| <i>RCA</i>     | Ribulose biphosphate carboxylase/oxygenase activase, chloroplastic | 3.22   |
| <i>RCA</i>     | Ribulose biphosphate carboxylase/oxygenase activase, chloroplastic | 5.41   |
| <i>RLM1A</i>   | Disease resistance protein RML1A                                   | 3.58   |
| <i>RLP51</i>   | Receptor-like protein 51                                           | 1.93   |
| <i>SAG20</i>   | Senescence associated gene 20                                      | 4.23   |
| <i>SDF2</i>    | Stromal cell-derived factor 2-like protein                         | 2.99   |
| <i>TET8</i>    | Tetraspanin-8                                                      | 2.23   |
| <i>TIFY10A</i> | Protein TIFY 10A                                                   | 8.65   |
| <i>TIFY3B</i>  | Protein TIFY 3B                                                    | 2.52   |
| <i>TLP1</i>    | Thaumatococcus-like protein 1                                      | 4.38   |
| <i>WIN1</i>    | Pathogenesis-related protein PR-4B                                 | -6.33  |
| <i>WRKY17</i>  | Probable WRKY transcription factor 17                              | 8.51   |

---

**Table S8.** Translation genes differentially expressed in CR and CS.

| Gene name                | Protein name                               | log <sub>2</sub> Ratio<br>(CR/CS) |
|--------------------------|--------------------------------------------|-----------------------------------|
| <b>Ribosomal protein</b> |                                            |                                   |
| <i>ARP1</i>              | 60S ribosomal protein L3-1                 | -1.77                             |
| <i>CTHT_0041970.2</i>    | 40S ribosomal protein S24                  | 4.27                              |
| <i>Os08g0130500</i>      | 60S acidic ribosomal protein P0            | 2.10                              |
| <i>rpl10</i>             | 60S ribosomal protein L10                  | 10.85                             |
| <i>RPL10A</i>            | 60S ribosomal protein L10a                 | -9.37                             |
| <i>rpl10a</i>            | 60S ribosomal protein L10a                 | 12.25                             |
| <i>RPL10C</i>            | 60S ribosomal protein L10-3                | 2.28                              |
| <i>RPL11</i>             | 60S ribosomal protein L11                  | -9.30                             |
| <i>rpl11</i>             | 60S ribosomal protein L11                  | 12.07                             |
| <i>RPL12</i>             | 60S ribosomal protein L12                  | 12.13                             |
| <i>rpl1202</i>           | 60S ribosomal protein L12-B                | 7.78                              |
| <i>RPL12A</i>            | 50S ribosomal protein L12-1, chloroplastic | 8.87                              |
| <i>RPL13</i>             | 60S ribosomal protein L13                  | 8.23                              |
| <i>Rpl13</i>             | 60S ribosomal protein L13                  | 12.15                             |
| <i>RPL13A</i>            | 60S ribosomal protein L13a                 | 11.82                             |
| <i>RPL14</i>             | 60S ribosomal protein L14                  | 10.88                             |
| <i>RPL15</i>             | 60S ribosomal protein L15                  | -8.47                             |
| <i>rpl15</i>             | 60S ribosomal protein L15                  | 11.74                             |
| <i>rpl16</i>             | 50S ribosomal protein L16, plastid         | -1.03                             |
| <i>RPL17</i>             | 60S ribosomal protein L17                  | -9.43                             |
| <i>Rpl17</i>             | 60S ribosomal protein L17                  | 12.57                             |
| <i>RPL18</i>             | 50S ribosomal protein L18, chloroplastic   | 1.11                              |
| <i>rpl18</i>             | 60S ribosomal protein L18                  | 11.55                             |
| <i>rpl18a</i>            | 60S ribosomal protein L18a                 | 11.83                             |
| <i>RPL19</i>             | 60S ribosomal protein L19                  | -8.57                             |
| <i>rpl19</i>             | 60S ribosomal protein L19                  | 10.89                             |
| <i>RPL21</i>             | 60S ribosomal protein L21                  | 11.06                             |
| <i>Rpl22</i>             | 60S ribosomal protein L22                  | 10.70                             |
| <i>RPL22B</i>            | 60S ribosomal protein L22-2                | 2.14                              |
| <i>RPL23</i>             | 60S ribosomal protein L23                  | 12.86                             |
| <i>RPL23A</i>            | 60S ribosomal protein L23A                 | 2.95                              |
| <i>RPL23A</i>            | 60S ribosomal protein L23a                 | 12.63                             |
| <i>RPL24</i>             | 60S ribosomal protein L24                  | 11.61                             |
| <i>RPL24B</i>            | 60S ribosomal protein L24-2                | 2.08                              |
| <i>RPL26</i>             | 60S ribosomal protein L26                  | 5.02                              |
| <i>RPL26</i>             | 60S ribosomal protein L26                  | 12.27                             |
| <i>rpl27</i>             | 60S ribosomal protein L27                  | 11.08                             |
| <i>RPL27A</i>            | 60S ribosomal protein L27a                 | 4.74                              |
| <i>RPL27A</i>            | 60S ribosomal protein L27a                 | 11.64                             |
| <i>RPL27A</i>            | 60S ribosomal protein L27a                 | -9.23                             |
| <i>RPL28</i>             | 50S ribosomal protein L28, chloroplastic   | 1.60                              |
| <i>Rpl28</i>             | 60S ribosomal protein L28                  | 12.10                             |
| <i>RPL29</i>             | 60S ribosomal protein L29                  | 10.86                             |
| <i>RPL3</i>              | 60S ribosomal protein L3                   | 11.86                             |
| <i>RPL3</i>              | Ribosomal protein L3                       | 1.85                              |
| <i>rpl30</i>             | 60S ribosomal protein L30                  | 11.83                             |

|               |                                          |       |
|---------------|------------------------------------------|-------|
| <i>RPL30</i>  | 60S ribosomal protein L30                | 8.92  |
| <i>RPL31</i>  | 60S ribosomal protein L31                | -9.24 |
| <i>rpl31</i>  | 60S ribosomal protein L31                | 12.10 |
| <i>rpl32</i>  | 60S ribosomal protein L32                | 11.86 |
| <i>rpl34</i>  | 60S ribosomal protein L34                | 11.05 |
| <i>rpl35</i>  | 60S ribosomal protein L35                | 12.35 |
| <i>RPL35</i>  | 60S ribosomal protein L35                | -2.02 |
| <i>rpl35a</i> | 60S ribosomal protein L35a               | 11.09 |
| <i>rpl36</i>  | 60S ribosomal protein L36                | 11.24 |
| <i>rpl36a</i> | 60S ribosomal protein L36a               | 7.12  |
| <i>rpl37</i>  | 60S ribosomal protein L37                | 11.66 |
| <i>Rpl37</i>  | 60S ribosomal protein L37                | -9.00 |
| <i>RPL37A</i> | 60S ribosomal protein L37a               | -8.70 |
| <i>rpl37a</i> | 60S ribosomal protein L37a               | 11.95 |
| <i>RPL38</i>  | 60S ribosomal protein L38                | 2.80  |
| <i>rpl39</i>  | 60S ribosomal protein L39                | 10.92 |
| <i>RPL4</i>   | 60S ribosomal protein L4                 | 2.93  |
| <i>RPL4</i>   | 60S ribosomal protein L4                 | -7.65 |
| <i>rpl4-a</i> | 60S ribosomal protein L4-A               | 11.30 |
| <i>RPL5</i>   | 60S ribosomal protein L5                 | 3.51  |
| <i>RPL5</i>   | 60S ribosomal protein L5                 | 10.98 |
| <i>RPL5</i>   | 60S ribosomal protein L5, mitochondrial  | 2.97  |
| <i>RPL6</i>   | 60S ribosomal protein L6                 | 2.75  |
| <i>RPL6</i>   | 60S ribosomal protein L6                 | 11.93 |
| <i>RPL6C</i>  | 60S ribosomal protein L6-3               | 3.22  |
| <i>RPL7</i>   | 60S ribosomal protein L7                 | 11.53 |
| <i>rpl7a</i>  | 60S ribosomal protein L7a                | 12.32 |
| <i>RPL7A</i>  | 60S ribosomal protein L7a                | -7.77 |
| <i>RPL8</i>   | 60S ribosomal protein L8                 | 3.10  |
| <i>rpl8</i>   | 60S ribosomal protein L8                 | 11.52 |
| <i>RPL8</i>   | 60S ribosomal protein L8                 | -9.31 |
| <i>rpl9</i>   | 60S ribosomal protein L9                 | 11.54 |
| <i>RPLP0</i>  | 60S acidic ribosomal protein P0          | -7.39 |
| <i>rplp0</i>  | 60S acidic ribosomal protein P0          | 11.88 |
| <i>RPLP1</i>  | 60S acidic ribosomal protein P1          | 12.80 |
| <i>RPLP1</i>  | 60S acidic ribosomal protein P1          | 3.12  |
| <i>Rplp1</i>  | 60S acidic ribosomal protein P1          | -9.36 |
| <i>RPLP1</i>  | 60S acidic ribosomal protein P1          | -9.72 |
| <i>RPLP2</i>  | 60S acidic ribosomal protein P2          | 11.30 |
| <i>RPP1A</i>  | 60S acidic ribosomal protein P1          | 2.65  |
| <i>RPP1A</i>  | 60S acidic ribosomal protein P1          | 1.03  |
| <i>Rps10</i>  | 40S ribosomal protein S10                | -8.04 |
| <i>RPS10</i>  | 40S ribosomal protein S10                | -8.88 |
| <i>rps10</i>  | 40S ribosomal protein S10                | 11.47 |
| <i>RPS10A</i> | 40S ribosomal protein S10-1              | 3.46  |
| <i>rps11</i>  | 30S ribosomal protein S11, chloroplastic | -6.25 |
| <i>RPS11</i>  | 40S ribosomal protein S11                | 11.66 |
| <i>RPS12</i>  | 40S ribosomal protein S12                | 11.38 |
| <i>RPS12</i>  | 40S ribosomal protein S12                | 4.54  |
| <i>RPS12</i>  | 40S ribosomal protein S12                | -8.36 |
| <i>rps13</i>  | 40S ribosomal protein S13                | 11.69 |



|               |                                          |        |
|---------------|------------------------------------------|--------|
| <i>RPS14</i>  | 40S ribosomal protein S14                | 7.35   |
| <i>RPS14A</i> | 40S ribosomal protein S14-1              | 3.08   |
| <i>RPS14B</i> | 40S ribosomal protein S14-2              | 2.65   |
| <i>RPS15</i>  | 40S ribosomal protein S15                | 10.89  |
| <i>RPS15A</i> | 40S ribosomal protein S15a               | 11.23  |
| <i>RPS16</i>  | 40S ribosomal protein S16                | -9.00  |
| <i>rps16</i>  | 40S ribosomal protein S16                | 11.48  |
| <i>RPS17</i>  | 40S ribosomal protein S17                | 9.82   |
| <i>rps18</i>  | 40S ribosomal protein S18                | 12.15  |
| <i>RPS18B</i> | 40S ribosomal protein S18-B              | 3.02   |
| <i>rps19</i>  | 40S ribosomal protein S19                | 12.92  |
| <i>RPS2</i>   | 40S ribosomal protein S2                 | -9.07  |
| <i>Rps2</i>   | 40S ribosomal protein S2                 | 2.97   |
| <i>rps2</i>   | 40S ribosomal protein S2                 | 12.46  |
| <i>RPS20</i>  | 40S ribosomal protein S20                | 12.88  |
| <i>rps21</i>  | 40S ribosomal protein S21                | 9.86   |
| <i>RPS21C</i> | 40S ribosomal protein S21-2              | 1.07   |
| <i>RPS23</i>  | 40S ribosomal protein S12                | 10.07  |
| <i>rps23</i>  | 40S ribosomal protein S23                | 11.57  |
| <i>RPS24</i>  | 40S ribosomal protein S24                | -8.69  |
| <i>rps24</i>  | 40S ribosomal protein S24                | 12.12  |
| <i>rps25</i>  | 40S ribosomal protein S25                | 11.03  |
| <i>RPS26</i>  | 40S ribosomal protein S26                | 11.48  |
| <i>rps27</i>  | 40S ribosomal protein S27                | 11.24  |
| <i>Rps27</i>  | 40S ribosomal protein S27                | 10.79  |
| <i>rps27a</i> | Ubiquitin-40S ribosomal protein S27a     | 11.18  |
| <i>RPS27L</i> | 40S ribosomal protein S27-like           | 10.35  |
| <i>rps28</i>  | 40S ribosomal protein S28                | 10.07  |
| <i>rps3</i>   | 40S ribosomal protein S3                 | 11.27  |
| <i>RPS3A</i>  | 40S ribosomal protein S3a                | -9.18  |
| <i>rps3a</i>  | 40S ribosomal protein S3a                | 12.21  |
| <i>RPS4X</i>  | 40S ribosomal protein S4, X isoform      | -7.50  |
| <i>rps4x</i>  | 40S ribosomal protein S4, X isoform      | 9.01   |
| <i>RPS5</i>   | 40S ribosomal protein S5                 | 11.04  |
| <i>RPS6</i>   | 40S ribosomal protein S6                 | -9.33  |
| <i>rps6</i>   | 40S ribosomal protein S6                 | 12.56  |
| <i>RPS6</i>   | 40S ribosomal protein S6                 | -3.48  |
| <i>rps7</i>   | 40S ribosomal protein S7                 | 11.33  |
| <i>RPS7</i>   | 40S ribosomal protein S7                 | -9.51  |
| <i>RPS7</i>   | Ribosomal protein S7, mitochondrial      | 1.04   |
| <i>rps8</i>   | 40S ribosomal protein S8                 | 11.76  |
| <i>RPS8</i>   | 40S ribosomal protein S8                 | -9.35  |
| <i>RPS9</i>   | 40S ribosomal protein S9                 | 11.58  |
| <i>RPSA</i>   | 40S ribosomal protein SA                 | -8.98  |
| <i>RPSA</i>   | 40S ribosomal protein SA                 | -9.22  |
| <i>rpsa</i>   | 40S ribosomal protein SA                 | 11.66  |
| <i>rpsO</i>   | 30S ribosomal protein S15                | -1.48  |
| <i>Tpt1</i>   | Translationally-controlled tumor protein | -10.13 |
| <i>TPT1</i>   | Translationally-controlled tumor protein | -9.91  |
| <i>UBA52</i>  | Ubiquitin-60S ribosomal protein L40      | 7.47   |
| <i>ubi3</i>   | Ubiquitin-40S ribosomal protein S27a     | 2.30   |

|                                      |                                                       |       |
|--------------------------------------|-------------------------------------------------------|-------|
| <i>YRPS3</i>                         | Ribosomal protein S3, mitochondrial                   | -1.67 |
| <b>Translation initiation factor</b> |                                                       |       |
| <i>At1g54290</i>                     | Protein translation factor SUI1 homolog 2             | 3.17  |
| <i>At1g77840</i>                     | Probable eukaryotic translation initiation factor 5-2 | 4.36  |
| <i>At4g27130</i>                     | Protein translation factor SUI1 homolog 1             | 4.62  |
| <i>EIF(ISO)4G1</i>                   | Eukaryotic translation initiation factor isoform 4G-1 | 2.95  |
| <i>Eif1</i>                          | Eukaryotic translation initiation factor 1            | -8.88 |
| <i>EIF4B3</i>                        | Eukaryotic translation initiation factor 4B3          | -1.26 |
| <i>EIF5A</i>                         | Eukaryotic translation initiation factor 5A-1         | 10.64 |
| <i>EIF5A</i>                         | Eukaryotic translation initiation factor 5A-1         | -8.73 |
| <i>EIF-5A1</i>                       | Eukaryotic translation initiation factor 5A           | 3.17  |
| <i>ERF1-1</i>                        | Eukaryotic peptide chain release factor subunit 1-1   | 4.80  |
| <i>TIF</i>                           | Protein translation factor SUI1 homolog               | 4.96  |
| <i>TIF11</i>                         | Eukaryotic translation initiation factor 1A           | 2.38  |
| <i>TIF3C1</i>                        | Eukaryotic translation initiation factor 3 subunit C  | 9.03  |
| <i>TIF4A-1</i>                       | Eukaryotic initiation factor 4A-1                     | 2.35  |
| <b>Elongation factor</b>             |                                                       |       |
| <i>At1g30230</i>                     | Elongation factor 1-delta                             | -1.65 |
| <i>At1g30230</i>                     | Elongation factor 1-delta 1                           | 2.43  |
| <i>eef1a</i>                         | Elongation factor 1-alpha                             | 13.65 |
| <i>EEF1A1</i>                        | Elongation factor 1-alpha 1                           | -8.10 |
| <i>EEF1B</i>                         | Elongation factor 1-beta                              | 11.10 |
| <i>EEF1G</i>                         | Elongation factor 1-gamma                             | -9.16 |
| <i>eef1g</i>                         | Elongation factor 1-gamma                             | 11.42 |
| <i>Eef2</i>                          | Elongation factor 2                                   | -8.97 |
| <i>EEF2</i>                          | Elongation factor 2                                   | 11.72 |
| <i>EEF2</i>                          | Elongation factor 2                                   | 11.65 |
| <i>Ef1alpha100E</i>                  | Elongation factor 1-alpha                             | 5.97  |
| <i>LOS1</i>                          | Elongation factor 2                                   | 1.93  |
| <i>TEF</i>                           | Elongation factor 1-alpha                             | 2.28  |
| <i>tef2</i>                          | Translation elongation factor 2                       | 8.60  |
| <i>others</i>                        |                                                       |       |
| <i>APUM11</i>                        | Pumilio homolog 11                                    | 2.56  |
| <i>APUM12</i>                        | Pumilio homolog 12                                    | 4.96  |
| <i>At3g62120</i>                     | Proline--tRNA ligase, cytoplasmic                     | 2.30  |
| <i>At5g08100</i>                     | Isoaspartyl peptidase/L-asparaginase 1                | 1.02  |
| <i>At5g26710</i>                     | Glutamate--tRNA ligase, cytoplasmic                   | 3.08  |
| <i>CAF1-7</i>                        | Probable CCR4-associated factor 1 homolog 7           | 2.65  |
| <i>CNR7</i>                          | Cell number regulator 7                               | -1.54 |
| <i>FAU</i>                           | Ubiquitin-like protein FUBI                           | 11.42 |
| <i>fes1</i>                          | Hsp70 nucleotide exchange factor fes1                 | 4.63  |
| <i>LSG1-2</i>                        | GTPase LSG1-2                                         | 1.80  |
| <i>N/A</i>                           | Protein phosphatase PP2A regulatory subunit A         | 3.30  |
| <i>NARS</i>                          | Asparagine--tRNA ligase, cytoplasmic                  | 10.33 |
| <i>PAB7</i>                          | Polyadenylate-binding protein 7                       | 2.84  |
| <i>PEL1</i>                          | Protein PELOTA 1                                      | -6.50 |
| <i>ran</i>                           | GTP-binding nuclear protein Ran                       | 9.81  |
| <i>RNP1</i>                          | Heterogeneous nuclear ribonucleoprotein 1             | 1.89  |
| <i>rsl24d1</i>                       | Probable ribosome biogenesis protein RLP24            | 9.09  |
| <i>SYNC1</i>                         | Asparagine--tRNA ligase, cytoplasmic 1                | 3.18  |

**Table S9.** Secondary metabolism genes differentially expressed in CR and CS.

| Gene name                                  | Protein name                                                                        | log <sub>2</sub> Ratio<br>(CR/CS) |
|--------------------------------------------|-------------------------------------------------------------------------------------|-----------------------------------|
| <b>Hormone biosynthesis and metabolism</b> |                                                                                     |                                   |
| <i>N/A</i>                                 | Zeaxanthin epoxidase, chloroplastic                                                 | 1.06                              |
| <i>ABA2</i>                                | Xanthoxin dehydrogenase                                                             | 1.61                              |
| <i>ACO</i>                                 | 1-aminocyclopropane-1-carboxylate oxidase                                           | -1.16                             |
| <i>ACO1</i>                                | 1-aminocyclopropane-1-carboxylate oxidase                                           | -4.59                             |
| <i>ACO3</i>                                | 1-aminocyclopropane-1-carboxylate oxidase 3                                         | -4.01                             |
| <i>ACS1</i>                                | 1-aminocyclopropane-1-carboxylate synthase                                          | -2.52                             |
| <i>ACS-1</i>                               | 1-aminocyclopropane-1-carboxylate synthase                                          | 10.14                             |
| <i>ACS8</i>                                | 1-aminocyclopropane-1-carboxylate synthase 8                                        | 1.70                              |
| <i>CKX1</i>                                | Cytokinin dehydrogenase 1                                                           | 4.03                              |
| <i>CKX5</i>                                | Cytokinin dehydrogenase 5                                                           | 3.19                              |
| <i>CKX6</i>                                | Cytokinin dehydrogenase 6                                                           | 4.83                              |
| <i>CKX7</i>                                | Cytokinin dehydrogenase 7                                                           | -1.46                             |
| <i>CYP707A1</i>                            | Abscisic acid 8'-hydroxylase 1                                                      | -2.24                             |
| <i>CYP707A4</i>                            | Abscisic acid 8'-hydroxylase 4                                                      | 1.16                              |
| <i>CYP707A6</i>                            | Abscisic acid 8'-hydroxylase 2                                                      | -1.04                             |
| <i>CYP735A2</i>                            | Cytokinin hydroxylase                                                               | -3.20                             |
| <i>GA1</i>                                 | Ent-copalyl diphosphate synthase, chloroplastic                                     | 2.08                              |
| <i>GA20OX1</i>                             | Gibberellin 20 oxidase 1                                                            | 6.34                              |
| <i>GA2OX1</i>                              | Gibberellin 2-beta-dioxygenase                                                      | 1.34                              |
| <i>GA2OX2</i>                              | Gibberellin 2-beta-dioxygenase 2                                                    | 5.62                              |
| <i>GA2OX6</i>                              | Gibberellin 2-beta-dioxygenase 6                                                    | 2.72                              |
| <i>GULLO3</i>                              | L-gulonolactone oxidase 3                                                           | 1.04                              |
| <i>GULLO6</i>                              | Probable L-gulonolactone oxidase 6                                                  | 2.38                              |
| <i>HSD3B</i>                               | 3 beta-hydroxysteroid dehydrogenase/Delta 5-->4-isomerase                           | -8.95                             |
| <i>IPT5</i>                                | Adenylate isopentenyltransferase 5, chloroplastic                                   | -11.35                            |
| <i>LE</i>                                  | Gibberellin 3-beta-dioxygenase 1                                                    | -1.36                             |
| <i>LOG3</i>                                | Cytokinin riboside 5'-monophosphate phosphoribohydrolase<br>LOG3                    | 2.44                              |
| <i>LOG7</i>                                | Cytokinin riboside 5'-monophosphate phosphoribohydrolase<br>LOG7                    | 10.47                             |
| <i>LOG8</i>                                | Cytokinin riboside 5'-monophosphate phosphoribohydrolase<br>LOG8                    | -3.45                             |
| <i>NPF3.1</i>                              | Protein NRT1/ PTR FAMILY 3.1                                                        | -4.18                             |
| <i>WAT1</i>                                | Protein WALLS ARE THIN 1                                                            | 1.77                              |
| <i>XERICO</i>                              | Probable E3 ubiquitin-protein ligase XERICO                                         | 1.83                              |
| <i>YUC10</i>                               | Probable indole-3-pyruvate monooxygenase YUCCA10                                    | -5.41                             |
| <i>YUC4</i>                                | Probable indole-3-pyruvate monooxygenase YUCCA4                                     | 9.41                              |
| <i>YUC6</i>                                | Indole-3-pyruvate monooxygenase YUCCA6                                              | 10.20                             |
| <b>Terpene biosynthesis and metabolism</b> |                                                                                     |                                   |
| <i>CYC2</i>                                | Iridoid synthase                                                                    | -2.09                             |
| <i>CYC2</i>                                | Iridoid synthase CYC2                                                               | -1.08                             |
| <i>CYP716A17</i>                           | Beta-amyrin 28-monooxygenase                                                        | 2.04                              |
| <i>GGR</i>                                 | Heterodimeric geranylgeranyl pyrophosphate synthase small<br>subunit, chloroplastic | 2.37                              |
| <i>LUS1</i>                                | Lupeol synthase                                                                     | -4.48                             |
| <i>OSCBPW</i>                              | Lupeol synthase                                                                     | -3.66                             |
| <i>VIT_19s0014g0493</i>                    | (-)-germacrene D synthase                                                           | 3.66                              |

**Flavonoid biosynthesis and metabolism**

|                  |                                                          |       |
|------------------|----------------------------------------------------------|-------|
| <i>ANR</i>       | Anthocyanidin reductase ((2S)-flavan-3-ol-forming)       | -1.76 |
| <i>At3g11180</i> | Probable 2-oxoglutarate-dependent dioxygenase At3g111800 | -4.87 |
| <i>BHLH</i>      | Basic helix-loop-helix protein A                         | -1.32 |
| <i>CHI</i>       | Chalcone--flavonone isomerase                            | -1.35 |
| <i>DTX35</i>     | DETOXIFICATION 35                                        | 1.61  |
| <i>DTX41</i>     | Protein DETOXIFICATION 41                                | -1.97 |
| <i>FHT</i>       | Naringenin,2-oxoglutarate 3-dioxygenase                  | -1.95 |
| <i>HIDM</i>      | 2-hydroxyisoflavanone dehydratase                        | -2.72 |

**Jasmonic acid biosynthesis**

|              |                                        |       |
|--------------|----------------------------------------|-------|
| <i>4CLL5</i> | 4-coumarate--CoA ligase-like 5         | 4.42  |
| <i>AOS1</i>  | Allene oxide synthase 1, chloroplastic | -3.29 |
| <i>GRXC9</i> | Glutaredoxin-C9                        | -2.72 |
| <i>MES17</i> | Methylesterase 17                      | 2.64  |
| <i>OPR3</i>  | 12-oxophytodienoate reductase 3        | -1.41 |

**Alkaloid metabolism**

|             |                              |       |
|-------------|------------------------------|-------|
| <i>AAE</i>  | Acetylajmalan esterase       | -1.59 |
| <i>ACT</i>  | Vinorine synthase            | -2.97 |
| <i>CTS2</i> | Theobromine synthase 2       | 3.47  |
| <i>TCS2</i> | Probable caffeine synthase 2 | -1.78 |

**Hydrogen peroxide catabolism**

|              |                       |       |
|--------------|-----------------------|-------|
| <i>PER10</i> | Peroxidase 10         | 1.34  |
| <i>PER12</i> | Peroxidase 12         | 2.17  |
| <i>PER17</i> | Peroxidase 17         | 1.88  |
| <i>PER43</i> | Peroxidase 43         | -1.74 |
| <i>PER47</i> | Peroxidase 47         | 3.22  |
| <i>PER54</i> | Peroxidase 54         | 4.55  |
| <i>PER64</i> | Peroxidase 64         | 1.07  |
| <i>PER69</i> | Peroxidase 69         | -4.80 |
| <i>PNC1</i>  | Cationic peroxidase 1 | -1.42 |
| <i>PNC2</i>  | Cationic peroxidase 2 | -1.30 |
| <i>PRXC2</i> | Peroxidase C2         | 6.86  |

**Others**

|                  |                                                  |        |
|------------------|--------------------------------------------------|--------|
| <i>10HGO</i>     | 8-hydroxygeraniol dehydrogenase                  | 1.46   |
| <i>4CL1</i>      | 4-coumarate--CoA ligase 1                        | -1.04  |
| <i>4CLL6</i>     | 4-coumarate--CoA ligase-like 6                   | 5.14   |
| <i>ADC2</i>      | Arginine decarboxylase 2                         | 9.02   |
| <i>adhC2</i>     | NADP-dependent alcohol dehydrogenase C 2         | 2.02   |
| <i>AHA10</i>     | ATPase 10, plasma membrane-type                  | -1.83  |
| <i>AKR1C1</i>    | Prostaglandin F synthase 1                       | -10.20 |
| <i>ALDH</i>      | Aldehyde dehydrogenase                           | -3.05  |
| <i>ALDH2C4</i>   | Aldehyde dehydrogenase family 2 member C4        | -5.19  |
| <i>ALN</i>       | Allantoinase                                     | 1.33   |
| <i>ANS</i>       | Leucoanthocyanidin dioxygenase                   | -1.14  |
| <i>AOX4</i>      | Ubiquinol oxidase 4, chloroplastic/chromoplastic | 1.32   |
| <i>At1g10310</i> | NADPH-dependent pterin aldehyde reductase        | 1.50   |
| <i>At1g73050</i> | (R)-mandelonitrile lyase-like                    | 1.11   |
| <i>At2g04865</i> | MAIN-LIKE 2                                      | -9.21  |
| <i>At5g24760</i> | Alcohol dehydrogenase-like 6                     | -1.29  |
| <i>At5g38780</i> | Probable S-adenosylmethionine-dependent          | -4.62  |

|                  |                                                              |        |
|------------------|--------------------------------------------------------------|--------|
|                  | methyltransferase At5g38780                                  |        |
| <i>At5g60760</i> | P-loop NTPase domain-containing protein LPA1 homolog 1       | -3.68  |
| <i>ATR2</i>      | NADPH--cytochrome P450 reductase 2                           | 2.35   |
| <i>BCA1</i>      | Beta carbonic anhydrase 1, chloroplastic                     | 5.05   |
| <i>BCA2</i>      | Beta carbonic anhydrase 2, chloroplastic                     | 9.57   |
| <i>BCA2</i>      | Carbonic anhydrase, chloroplastic                            | -1.27  |
| <i>BEAT</i>      | Acetyl-CoA-benzylalcohol acetyltransferase                   | -10.99 |
| <i>Bp10</i>      | L-ascorbate oxidase homolog                                  | -2.72  |
| <i>CAD9</i>      | Probable cinnamyl alcohol dehydrogenase 9                    | -3.03  |
| <i>CAT1</i>      | Catalase isozyme 1                                           | -3.62  |
| <i>CER3</i>      | Very-long-chain aldehyde decarbonylase CER3                  | 1.72   |
| <i>CRY1</i>      | Cryptochrome-1                                               | 1.95   |
| <i>CSE</i>       | Caffeoylshikimate esterase                                   | -3.56  |
| <i>CXE15</i>     | Probable carboxylesterase 15                                 | 1.80   |
| <i>CYN</i>       | Cyanate hydratase                                            | 1.26   |
| <i>CYN</i>       | Cyanate hydratase                                            | 3.23   |
| <i>CYP716A15</i> | Beta-amyrin 28-monooxygenase                                 | -3.59  |
| <i>CYP71D8</i>   | Germacrene A hydroxylase                                     | -1.31  |
| <i>CYP79A1</i>   | Tyrosine N-monooxygenase                                     | -3.98  |
| <i>CYP79D4</i>   | Isoleucine N-monooxygenase 2                                 | -4.06  |
| <i>CYP96A15</i>  | Alkane hydroxylase MAH1                                      | -3.82  |
| <i>Dctpp1</i>    | dCTP pyrophosphatase 1                                       | -1.63  |
| <i>DFR</i>       | Dihydroflavonol 4-reductase                                  | -1.58  |
| <i>DFRA</i>      | Dihydroflavonol 4-reductase                                  | -2.18  |
| <i>DGAT1</i>     | Diacylglycerol O-acyltransferase 1                           | -1.26  |
| <i>DGAT3</i>     | Diacylglycerol O-acyltransferase 3                           | 3.99   |
| <i>DJ1B</i>      | Protein DJ-1 homolog B                                       | 4.18   |
| <i>DLO2</i>      | Protein DMR6-LIKE OXYGENASE 2                                | -1.43  |
| <i>DSEL</i>      | Phospholipase A1-IIgamma                                     | 2.75   |
| <i>ERF9</i>      | Ethylene-responsive transcription factor 9                   | 2.30   |
| <i>F6'H1</i>     | Feruloyl CoA ortho-hydroxylase 1                             | -4.24  |
| <i>FDH1</i>      | Formate dehydrogenase, chloroplastic/mitochondrial           | 8.86   |
| <i>FHY</i>       | Bifunctional riboflavin kinase/FMN phosphatase               | 1.05   |
| <i>FLS</i>       | Flavonol synthase/flavanone 3-hydroxylase                    | 8.60   |
| <i>FMOGS-OX3</i> | Flavin-containing monooxygenase FMO GS-OX3                   | -3.06  |
| <i>GDPD1</i>     | Glycerophosphodiester phosphodiesterase GDPD1, chloroplastic | -2.84  |
| <i>GGP1</i>      | Gamma-glutamyl peptidase 1                                   | 4.15   |
| <i>GGPS</i>      | Geranylgeranyl pyrophosphate synthase, chloroplastic         | 1.54   |
| <i>GPAT1</i>     | Glycerol-3-phosphate acyltransferase 1                       | 5.99   |
| <i>GPX3</i>      | Glutathione peroxidase 3                                     | -11.36 |
| <i>GRF1</i>      | Growth-regulating factor 1                                   | 3.43   |
| <i>GT5</i>       | Anthocyanidin 3-O-glucosyltransferase 5                      | -6.85  |
| <i>HIPL1</i>     | HIPL1 protein                                                | 1.69   |
| <i>HMG1</i>      | 3-hydroxy-3-methylglutaryl-coenzyme A reductase 1            | 2.99   |
| <i>HMG5</i>      | Hydroxymethylglutaryl-CoA synthase                           | -1.69  |
| <i>HRPN</i>      | Peroxidase N                                                 | -1.73  |
| <i>ICDH-1</i>    | Isocitrate dehydrogenase [NADP]                              | -1.33  |
| <i>IGMT4</i>     | Indole glucosinolate O-methyltransferase 4                   | 2.61   |
| <i>IMPDH</i>     | Inosine-5'-monophosphate dehydrogenase 1                     | 4.07   |
| <i>Inmt</i>      | Indolethylamine N-methyltransferase                          | -8.65  |

|                     |                                                                                     |       |
|---------------------|-------------------------------------------------------------------------------------|-------|
| <i>IP5P4</i>        | Type I inositol polyphosphate 5-phosphatase 4                                       | 1.26  |
| <i>IPCS2</i>        | Phosphatidylinositol:ceramide inositolphosphotransferase 2                          | -1.41 |
| <i>ISPH</i>         | 4-hydroxy-3-methylbut-2-enyl diphosphate reductase, chloroplastic                   | 3.24  |
| <i>KES1</i>         | Protein KES1                                                                        | 3.41  |
| <i>LOX3.1</i>       | Linoleate 13S-lipoxygenase 3-1, chloroplastic                                       | -3.84 |
| <i>malA</i>         | NADP-dependent malic enzyme                                                         | 2.10  |
| <i>MED33A</i>       | Mediator of RNA polymerase II transcription subunit 33A                             | -1.67 |
| <i>MEE23</i>        | Berberine bridge enzyme-like 15                                                     | 2.13  |
| <i>NADK3</i>        | NADH kinase                                                                         | 3.67  |
| <i>NDPK2</i>        | Nucleoside diphosphate kinase 2, chloroplastic                                      | -1.25 |
| <i>NIA1</i>         | Nitrate reductase [NADH], clone PBNBR1405                                           | 3.85  |
| <i>NIR1</i>         | Ferredoxin--nitrite reductase, chloroplastic                                        | 4.42  |
| <i>NIT4</i>         | Bifunctional nitrilase/nitrile hydratase NIT4                                       | 8.31  |
| <i>NLP2</i>         | Deaminated glutathione amidase, chloroplastic/cytosolic                             | -1.13 |
| <i>NME1-2</i>       | Nucleoside diphosphate kinase A2                                                    | 11.55 |
| <i>NMRK2</i>        | Nicotinamide riboside kinase 2                                                      | 11.54 |
| <i>NSP5</i>         | Nitrile-specifier protein 5                                                         | 4.91  |
| <i>NTR2</i>         | Thioredoxin reductase 2                                                             | 2.89  |
| <i>OMT1</i>         | Flavone 3'-O-methyltransferase 1                                                    | -1.73 |
| <i>Os01g0789100</i> | CDP-diacylglycerol--glycerol-3-phosphate 3-phosphatidyltransferase 1, chloroplastic | 1.21  |
| <i>Os04g0670700</i> | Probable phytol kinase, chloroplastic                                               | 1.01  |
| <i>OVA9</i>         | Glutamine--tRNA ligase, cytoplasmic                                                 | 3.90  |
| <i>PAO3</i>         | Polyamine oxidase 3                                                                 | -1.68 |
| <i>PCBER</i>        | Phenylcoumaran benzylic ether reductase POP1                                        | 1.38  |
| <i>PDC4</i>         | Pyruvate decarboxylase 4                                                            | 3.41  |
| <i>PSY</i>          | Phytoene synthase, chloroplastic                                                    | 2.50  |
| <i>ROMT</i>         | Trans-resveratrol di-O-methyltransferase                                            | -4.58 |
| <i>RUB1</i>         | Ubiquitin-NEDD8-like protein RUB1                                                   | 3.87  |
| <i>SCPL18</i>       | Serine carboxypeptidase-like 18                                                     | -1.12 |
| <i>SDC</i>          | Serine decarboxylase                                                                | 1.04  |
| <i>Sftpb</i>        | Pulmonary surfactant-associated protein B                                           | -8.72 |
| <i>SMT2</i>         | 24-methylenesterol C-methyltransferase 2                                            | 1.17  |
| <i>SNL6</i>         | Cinnamoyl-CoA reductase-like SNL6                                                   | -1.96 |
| <i>STPS</i>         | Sesquiterpene synthase                                                              | 9.19  |
| <i>SUD1</i>         | Probable E3 ubiquitin ligase SUD1                                                   | 5.09  |
| <i>TBL2</i>         | Protein trichome birefringence-like 2                                               | 1.61  |
| <i>TBL38</i>        | Protein trichome birefringence-like 38                                              | -2.66 |
| <i>TBL8</i>         | Protein trichome birefringence-like 8                                               | 1.60  |
| <i>THI1</i>         | Thiamine thiazole synthase, chloroplastic                                           | 3.70  |
| <i>THIC</i>         | Phosphomethylpyrimidine synthase, chloroplastic                                     | 4.25  |
| <i>TP53I3</i>       | Quinone oxidoreductase PIG3                                                         | 2.69  |
| <i>TPI1</i>         | Triosephosphate isomerase                                                           | -6.83 |
| <i>TSPO</i>         | Translocator protein homolog                                                        | -1.18 |

---

**Table S10.** Photosynthesis and energy genes differentially expressed in CR and CS.

| Gene name                        | Protein name                                                                    | log <sub>2</sub> Ratio (CR/CS) |
|----------------------------------|---------------------------------------------------------------------------------|--------------------------------|
| <b>Photosynthesis and energy</b> |                                                                                 |                                |
| <i>AOX1A</i>                     | Ubiquinol oxidase 1a, mitochondrial                                             | 3.00                           |
| <i>BCA4</i>                      | Beta carbonic anhydrase 4                                                       | 3.31                           |
| <i>CHLH</i>                      | Magnesium-chelatase subunit ChlH, chloroplastic                                 | 2.16                           |
| <i>CHLI</i>                      | Magnesium-chelatase subunit ChlI, chloroplastic                                 | 1.33                           |
| <i>CHLM</i>                      | Magnesium protoporphyrin IX methyltransferase, chloroplastic                    | 2.00                           |
| <i>CHLP</i>                      | Geranylgeranyl diphosphate reductase, chloroplastic                             | 4.38                           |
| <i>CHLP</i>                      | Geranylgeranyl diphosphate reductase, chloroplastic                             | 2.14                           |
| <i>CPX1</i>                      | Coproporphyrinogen-III oxidase 1, chloroplastic                                 | 4.09                           |
| <i>CRD1</i>                      | Magnesium-protoporphyrin IX monomethyl ester [oxidative] cyclase, chloroplastic | 1.34                           |
| <i>CRD1</i>                      | Magnesium-protoporphyrin IX monomethyl ester [oxidative] cyclase, chloroplastic | 4.38                           |
| <i>DCUP</i>                      | Uroporphyrinogen decarboxylase, chloroplastic                                   | -1.86                          |
| <i>DHNAT1</i>                    | 1,4-dihydroxy-2-naphthoyl-CoA thioesterase 1                                    | -1.12                          |
| <i>DVR</i>                       | Divinyl chlorophyllide a 8-vinyl-reductase, chloroplastic                       | 2.64                           |
| <i>EFL4</i>                      | Protein ELF4-LIKE 4                                                             | 1.88                           |
| <i>FAR1</i>                      | Protein FAR-RED IMPAIRED RESPONSE 1                                             | -2.31                          |
| <i>FD2</i>                       | Ferredoxin-2, chloroplastic                                                     | 3.33                           |
| <i>FTSH1</i>                     | ATP-dependent zinc metalloprotease FTSH 1, chloroplastic                        | 1.29                           |
| <i>FTSH1</i>                     | ATP-dependent zinc metalloprotease FTSH 1, chloroplastic                        | 1.22                           |
| <i>GLO1</i>                      | (S)-2-hydroxy-acid oxidase GLO1                                                 | 4.94                           |
| <i>GLYK</i>                      | D-glycerate 3-kinase, chloroplastic                                             | 3.13                           |
| <i>HY5</i>                       | Transcription factor HY5                                                        | -1.67                          |
| <i>KAI2</i>                      | Probable esterase KAI2                                                          | 3.39                           |
| <i>MTACP2</i>                    | Acyl carrier protein 3, mitochondrial                                           | -1.85                          |
| <i>mt-atp6</i>                   | ATP synthase subunit a                                                          | 12.81                          |
| <i>MT-ND1</i>                    | NADH-ubiquinone oxidoreductase chain 1                                          | -5.02                          |
| <i>MT-ND1</i>                    | NADH-ubiquinone oxidoreductase chain 1                                          | 12.05                          |
| <i>MT-ND2</i>                    | NADH-ubiquinone oxidoreductase chain 2                                          | -8.73                          |
| <i>MT-ND3</i>                    | NADH-ubiquinone oxidoreductase chain 3                                          | 10.74                          |
| <i>MT-ND4</i>                    | NADH-ubiquinone oxidoreductase chain 4                                          | 11.14                          |
| <i>MT-ND4</i>                    | NADH-ubiquinone oxidoreductase chain 4                                          | -10.16                         |
| <i>MT-ND5</i>                    | NADH-ubiquinone oxidoreductase chain 5                                          | 10.28                          |
| <i>MT-ND6</i>                    | NADH-ubiquinone oxidoreductase chain 6                                          | -9.67                          |
| <i>ND2</i>                       | NADH-ubiquinone oxidoreductase chain 2                                          | -1.62                          |
| <i>PAT1</i>                      | Scarecrow-like transcription factor PAT1                                        | 1.12                           |
| <i>PDR2</i>                      | Pleiotropic drug resistance protein 2                                           | -1.35                          |
| <i>PFP-ALPHA2</i>                | Pyrophosphate--fructose 6-phosphate 1-phosphotransferase subunit alpha 2        | 2.40                           |
| <i>PORA</i>                      | Protochlorophyllide reductase, chloroplastic                                    | 1.58                           |
| <i>PSBO1</i>                     | Oxygen-evolving enhancer protein 1-1, chloroplastic                             | 8.39                           |
| <i>PSBP1</i>                     | Oxygen-evolving enhancer protein 2-1, chloroplastic                             | 4.92                           |
| <i>RBCS-1A</i>                   | Ribulose biphosphate carboxylase small chain 1A, chloroplastic                  | 5.37                           |
| <i>RBCS-2</i>                    | Ribulose biphosphate carboxylase small chain 2, chloroplastic                   | 10.30                          |
| <i>RBCS-3B</i>                   | Ribulose biphosphate carboxylase small chain 3B, chloroplastic                  | 9.90                           |
| <i>SPA3</i>                      | Protein SPA1-RELATED 3                                                          | 1.04                           |
| <i>UVR8</i>                      | Ultraviolet-B receptor UVR8                                                     | 1.17                           |

|                                    |                                                                    |       |
|------------------------------------|--------------------------------------------------------------------|-------|
| <i>yhcF</i>                        | Ribosome-binding ATPase YchF                                       | 1.00  |
| <b>Photosystem I and II</b>        |                                                                    |       |
| <i>LHCA2</i>                       | Photosystem I chlorophyll a/b-binding protein 2, chloroplastic     | 9.33  |
| <i>LHCA3</i>                       | Photosystem I chlorophyll a/b-binding protein 3-1, chloroplastic   | 10.01 |
| <i>psaD1</i>                       | Photosystem I reaction center subunit II-1, chloroplastic          | 9.74  |
| <i>PSAE1</i>                       | Photosystem I reaction center subunit IV A, chloroplastic          | 5.56  |
| <i>PSAF</i>                        | Photosystem I reaction center subunit III, chloroplastic           | 4.88  |
| <i>PSAG</i>                        | Photosystem I reaction center subunit V, chloroplastic             | 10.16 |
| <i>PSAK</i>                        | Photosystem I reaction center subunit psaK, chloroplastic          | 5.53  |
| <i>PSAL</i>                        | Photosystem I reaction center subunit XI, chloroplastic            | 4.73  |
| <i>PSAN</i>                        | Photosystem I reaction center subunit N, chloroplastic             | 4.46  |
| <i>PSAO</i>                        | Photosystem I subunit O                                            | 9.62  |
| <i>PSBR</i>                        | Photosystem II 10 kDa polypeptide, chloroplastic                   | 4.13  |
| <i>PSBS</i>                        | Photosystem II 22 kDa protein, chloroplastic                       | 10.22 |
| <i>PSBT</i>                        | Photosystem II 5 kDa protein, chloroplastic                        | 10.21 |
| <i>PSBW</i>                        | Photosystem II reaction center W protein, chloroplastic            | 4.21  |
| <i>PSBY</i>                        | Photosystem II core complex proteins psbY, chloroplastic           | 10.20 |
| <b>Chlorophyll binding protein</b> |                                                                    |       |
| <i>CAB1</i>                        | Chlorophyll a-b binding protein 1, chloroplastic                   | 5.69  |
| <i>cabII-1</i>                     | Chlorophyll a-b binding protein of LHCII type I, chloroplastic     | 11.49 |
| <i>CAP10B</i>                      | Chlorophyll a-b binding protein CP24 10B, chloroplastic            | 9.41  |
| <i>LHCA1</i>                       | Chlorophyll a-b binding protein 6, chloroplastic                   | 5.32  |
| <i>LHCA4</i>                       | Chlorophyll a-b binding protein 4, chloroplastic                   | 5.48  |
| <i>LHCB1.3</i>                     | Chlorophyll a-b binding protein 1, chloroplastic                   | 6.60  |
| <i>LHCB2.1</i>                     | Chlorophyll a-b binding protein 2.1, chloroplastic                 | 11.23 |
| <i>LHCB2.1</i>                     | Chlorophyll a-b binding protein, chloroplastic                     | 8.56  |
| <i>LHCB2.4</i>                     | Chlorophyll a-b binding protein 2.4, chloroplastic                 | 7.55  |
| <i>LHCB3</i>                       | Chlorophyll a-b binding protein 3, chloroplastic                   | 10.09 |
| <i>LHCB4.2</i>                     | Chlorophyll a-b binding protein CP29.2, chloroplastic              | 9.76  |
| <i>LHCB5</i>                       | Chlorophyll a-b binding protein CP26, chloroplastic                | 5.21  |
| <i>OsI_012078</i>                  | Chlorophyll a-b binding protein, chloroplastic                     | 7.03  |
| <b>Cytochrome</b>                  |                                                                    |       |
| <i>CB5-A</i>                       | Cytochrome b5 isoform A                                            | 1.25  |
| <i>CCMFC</i>                       | Cytochrome c biogenesis CcmF C-terminal-like mitochondrial protein | -1.75 |
| <i>CCMH</i>                        | Cytochrome c-type biogenesis CcmH-like mitochondrial protein       | -1.08 |
| <i>COX1</i>                        | Cytochrome c oxidase subunit 1                                     | -2.47 |
| <i>COX15</i>                       | Cytochrome c oxidase assembly protein COX15                        | 1.12  |
| <i>CYB5</i>                        | Cytochrome b5                                                      | 3.42  |
| <i>Cyp2f2</i>                      | Cytochrome P450 2F2                                                | -7.82 |
| <i>CYP704C1</i>                    | Cytochrome P450 704C1                                              | -1.05 |
| <i>CYP705A12</i>                   | Cytochrome P450 705A12                                             | 1.14  |
| <i>CYP714C2</i>                    | Cytochrome P450 714C2                                              | 5.94  |
| <i>CYP71A9</i>                     | Cytochrome P450 71A9                                               | -3.44 |
| <i>CYP71D10</i>                    | Cytochrome P450 71D10                                              | -2.75 |
| <i>CYP71D9</i>                     | Cytochrome P450 71D9                                               | -3.70 |
| <i>CYP734A1</i>                    | Cytochrome P450 734A1                                              | 2.61  |
| <i>CYP750A1</i>                    | Cytochrome P450 CYP736A12                                          | -3.06 |
| <i>CYP77A2</i>                     | Cytochrome P450 77A2                                               | 1.90  |
| <i>CYP77A3</i>                     | Cytochrome P450 77A3                                               | 11.26 |
| <i>CYP78A7</i>                     | Cytochrome P450 78A7                                               | 4.71  |



|                |                                                            |        |
|----------------|------------------------------------------------------------|--------|
| <i>CYP78A9</i> | Cytochrome P450 78A9                                       | -4.81  |
| <i>CYP90A1</i> | Cytochrome P450 90A1                                       | 1.20   |
| <i>CYP90B1</i> | Cytochrome P450 90B1                                       | 3.64   |
| <i>CYP93A3</i> | Cytochrome P450 93A3                                       | 2.77   |
| <i>CYP94B1</i> | Cytochrome P450 94B1                                       | -6.81  |
| <i>CYP98A2</i> | Cytochrome P450 98A2                                       | -1.71  |
| <i>Mtco1</i>   | Cytochrome c oxidase subunit 1                             | -12.59 |
| <i>mt-co1</i>  | Cytochrome c oxidase subunit 1                             | 13.37  |
| <i>MT-CO1</i>  | Cytochrome c oxidase subunit 1                             | -13.24 |
| <i>mt-co2</i>  | Cytochrome c oxidase subunit 2                             | 13.36  |
| <i>MT-CO2</i>  | Cytochrome c oxidase subunit 2                             | -7.01  |
| <i>MT-CO2</i>  | Cytochrome c oxidase subunit 2                             | -11.88 |
| <i>mt-co3</i>  | Cytochrome c oxidase subunit 3                             | 13.44  |
| <i>mt-Co3</i>  | Cytochrome c oxidase subunit 3                             | -12.45 |
| <i>MT-CO3</i>  | Cytochrome c oxidase subunit 3                             | -11.80 |
| <i>mt-cyb</i>  | Cytochrome b                                               | 12.48  |
| <i>Mt-Cyb</i>  | Cytochrome b                                               | -11.28 |
| <i>petC</i>    | Cytochrome b6-f complex iron-sulfur subunit, chloroplastic | 9.01   |

---
